# Supplementary material
Source: MDPI journal article supplement (https://www.mdpi.com/2073-4441/14/2/258)
Supplement: s1 [file s1]

# Flow Intermittency Affects Leaf Decomposition and Benthic Consumer Communities of Alpine Streams: A Case Study along the Po River

Laura Gruppuso <sup>1,\*</sup>, Alberto Doretto <sup>2</sup>, Elisa Falasco <sup>3</sup>, Stefano Fenoglio <sup>4</sup>, Michele Freppaz <sup>5</sup>, Mark Eric Benbow <sup>6</sup> and Francesca Bona <sup>7</sup>

## Supplementary Materials

**Table S1.** Sampling dates in the three selected sampling reaches along the Po River, indicating instream conditions. T0 = leaf bags deployment; T1-T6 sampling campaigns.

| Sampling Site | Date        | Sampling Time | Instream Conditions |
|---------------|-------------|---------------|---------------------|
| Crissolo      | 13 Dec 2018 | T0            | Flow                |
|               | 03 Jan 2019 | T1            | Flow                |
|               | 24 Jan 2019 | T2            | Flow                |
|               | 14 Feb 2019 | T3            | Flow                |
|               | 07 Mar 2019 | T4            | Flow                |
|               | 29 Mar 2019 | T5            | Flow                |
|               | 19 Apr 2019 | T6            | Flow                |
| Sanfront      | 13 Dec 2018 | T0            | Flow                |
|               | 03 Jan 2019 | T1            | Flow                |
|               | 24 Jan 2019 | T2            | Flow                |
|               | 14 Feb 2019 | T3            | Flow                |
|               | 07 Mar 2019 | T4            | Flow                |
|               | 29 Mar 2019 | T5            | Flow                |
|               | 19 Apr 2019 | T6            | Flow                |
| Revello       | 13 Dec 2018 | T0            | Flow                |
|               | 03 Jan 2019 | T1            | Flow                |
|               | 24 Jan 2019 | T2            | Low Flow            |
|               | 14 Feb 2019 | T3            | Dry                 |
|               | 07 Mar 2019 | T4            | Dry                 |
|               | 29 Mar 2019 | T5            | Dry                 |
|               | 19 Apr 2019 | T6            | Low Flow            |

**Figure S1.** Water temperatures recorded at 6 h intervals and occurrence of dry events in the intermittent reach, based on in-field surveys and water temperatures data.

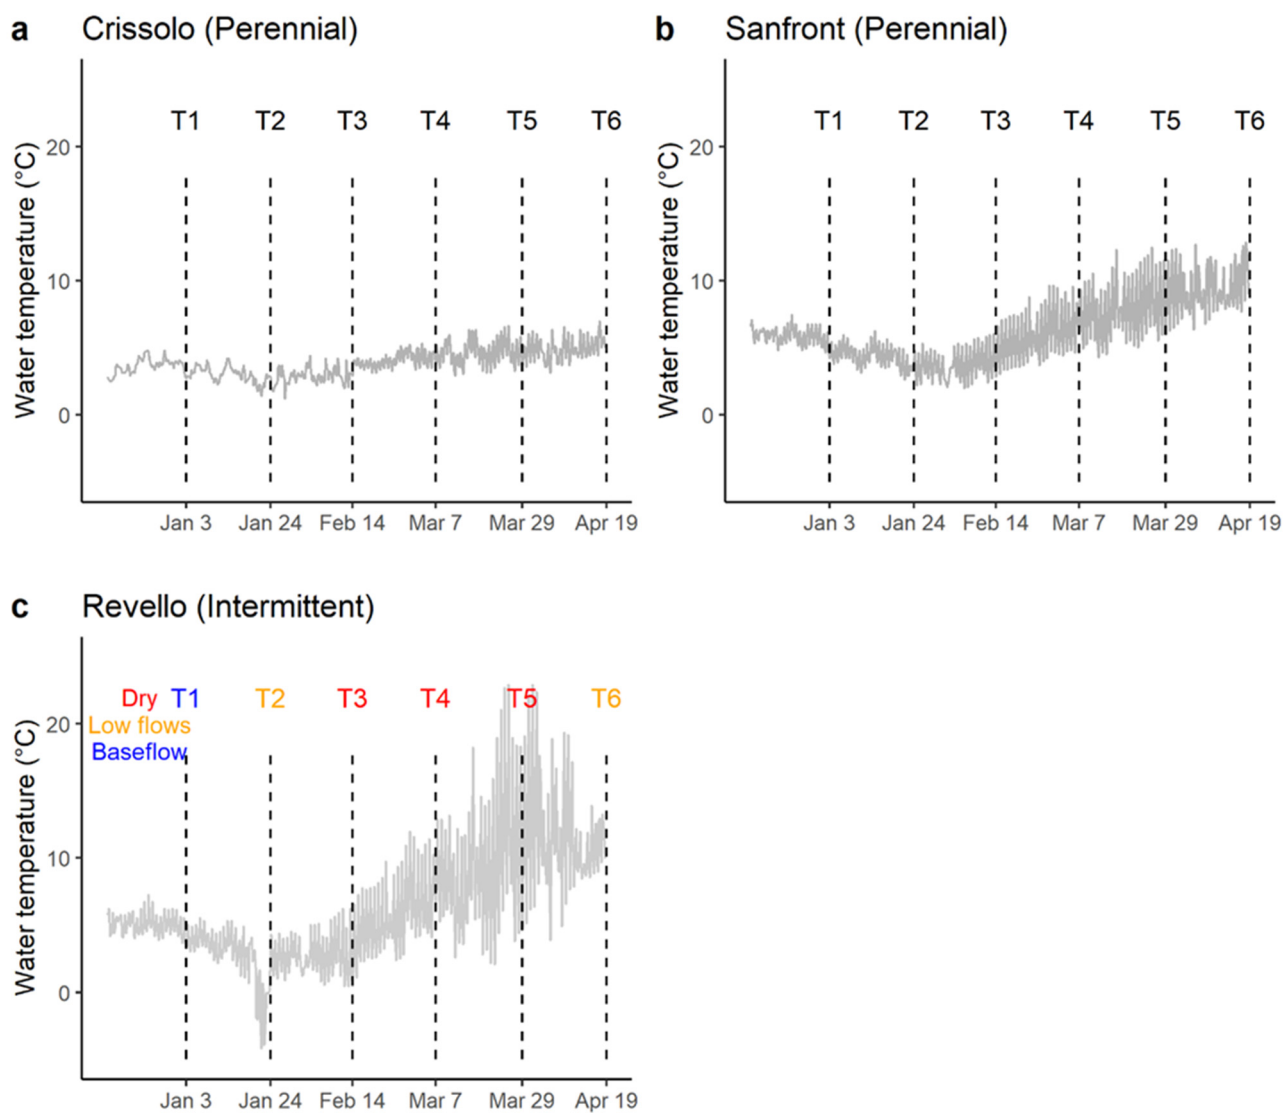

**Table S2.** Physical and chemical parameters recorded on each sampling date in the three selected sites.

| Sampling Reach  | Parameter                               | T1   | T2   | T3   | T4   | T5   | T6   |
|-----------------|-----------------------------------------|------|------|------|------|------|------|
| <b>Crissolo</b> | Water temperature (°C)                  | 3.5  | 1.3  | 3.2  | 4.18 | 3.9  | 4.6  |
|                 | Conductivity ( $\mu\text{S cm}^{-1}$ )  | 193  | 180  | 191  | 185  | 179  | 193  |
|                 | Dissolved oxygen ( $\text{mg L}^{-1}$ ) | 11.7 | 10.9 | 11.5 | 9.9  | 10.2 | 9.5  |
|                 | pH                                      | 7.9  | 7.9  | 8.3  | 8.3  | 8.5  | 8.3  |
| <b>Sanfront</b> | Water temperature (°C)                  | 5.9  | 4.9  | 6.9  | 8.6  | 11.1 | 13.9 |
|                 | Conductivity ( $\mu\text{S cm}^{-1}$ )  | 170  | 158  | 165  | 172  | 175  | 166  |
|                 | Dissolved oxygen ( $\text{mg L}^{-1}$ ) | 10.9 | 11.3 | 9.9  | 9.8  | 10.8 | 9.6  |
|                 | pH                                      | 8.2  | 7.9  | 8.8  | 8.3  | 8.4  | 8.6  |
| <b>Revello</b>  | Water temperature (°C)                  | 4.4  | 2.9  | dry  | dry  | dry  | 13.6 |
|                 | Conductivity ( $\mu\text{S cm}^{-1}$ )  | 140  | 155  | dry  | dry  | dry  | 152  |
|                 | Dissolved oxygen ( $\text{mg L}^{-1}$ ) | 8.4  | 12.4 | dry  | dry  | dry  | 9.2  |
|                 | pH                                      | 8.0  | 7.6  | dry  | dry  | dry  | 7.7  |

**Table S3.** Tukey test comparisons for oak leaves taxa richness (S). Significance codes: \*\*\*  $\leq 0.001$ ; \*\*  $\leq 0.01$ ; \*  $\leq 0.05$ .

| Comparison      | Estimate  | Std. Error | Z Value | p-Value              |
|-----------------|-----------|------------|---------|----------------------|
| 1CriT2 - 1CriT1 | -0.242313 | 0.169668   | -1.428  | 0.9940               |
| 1CriT3 - 1CriT1 | -0.051960 | 0.161219   | -0.322  | 1.0000               |
| 1CriT4 - 1CriT1 | -0.164755 | 0.166083   | -0.992  | 0.9999               |
| 1CriT5 - 1CriT1 | -0.226313 | 0.176569   | -1.282  | 0.9983               |
| 1CriT6 - 1CriT1 | -0.477628 | 0.181842   | -2.627  | 0.4182               |
| 2SanT1 - 1CriT1 | -0.038715 | 0.160674   | -0.241  | 1.0000               |
| 2SanT2 - 1CriT1 | -0.195061 | 0.167460   | -1.165  | 0.9995               |
| 2SanT3 - 1CriT1 | -0.551736 | 0.195702   | -2.819  | 0.2865               |
| 2SanT4 - 1CriT1 | -0.012739 | 0.159621   | -0.080  | 1.0000               |
| 2SanT5 - 1CriT1 | -0.179793 | 0.166763   | -1.078  | 0.9998               |
| 2SanT6 - 1CriT1 | -0.459928 | 0.173787   | -2.646  | 0.4021               |
| 3RevT1 - 1CriT1 | -0.696317 | 0.186763   | -3.728  | <b>0.0218 *</b>      |
| 3RevT2 - 1CriT1 | -0.608248 | 0.189510   | -3.210  | 0.1088               |
| 3RevT3 - 1CriT1 | -0.457425 | 0.180716   | -2.531  | 0.4902               |
| 3RevT4 - 1CriT1 | -0.362115 | 0.175613   | -2.062  | 0.8284               |
| 3RevT5 - 1CriT1 | -1.191394 | 0.233077   | -5.112  | <b>&lt;0.001 ***</b> |
| 3RevT6 - 1CriT1 | -1.912712 | 0.335646   | -5.699  | <b>&lt;0.001 ***</b> |
| 1CriT3 - 1CriT2 | 0.190354  | 0.171646   | 1.109   | 0.9997               |
| 1CriT4 - 1CriT2 | 0.077558  | 0.176223   | 0.440   | 1.0000               |
| 1CriT5 - 1CriT2 | 0.016000  | 0.186139   | 0.086   | 1.0000               |
| 1CriT6 - 1CriT2 | -0.235314 | 0.191147   | -1.231  | 0.9990               |
| 2SanT1 - 1CriT2 | 0.203599  | 0.171134   | 1.190   | 0.9994               |
| 2SanT2 - 1CriT2 | 0.047253  | 0.177521   | 0.266   | 1.0000               |
| 2SanT3 - 1CriT2 | -0.309422 | 0.204377   | -1.514  | 0.9888               |
| 2SanT4 - 1CriT2 | 0.229574  | 0.170146   | 1.349   | 0.9970               |
| 2SanT5 - 1CriT2 | 0.062520  | 0.176863   | 0.353   | 1.0000               |
| 2SanT6 - 1CriT2 | -0.217615 | 0.183502   | -1.186  | 0.9994               |
| 3RevT1 - 1CriT2 | -0.454003 | 0.195835   | -2.318  | 0.6552               |
| 3RevT2 - 1CriT2 | -0.365934 | 0.198456   | -1.844  | 0.9263               |
| 3RevT3 - 1CriT2 | -0.215111 | 0.190076   | -1.132  | 0.9997               |
| 3RevT4 - 1CriT2 | -0.119801 | 0.185232   | -0.647  | 1.0000               |
| 3RevT5 - 1CriT2 | -0.949081 | 0.240407   | -3.948  | <b>&lt;0.01 **</b>   |
| 3RevT6 - 1CriT2 | -1.670399 | 0.340777   | -4.902  | <b>&lt;0.001 ***</b> |
| 1CriT4 - 1CriT3 | -0.112795 | 0.168103   | -0.671  | 1.0000               |
| 1CriT5 - 1CriT3 | -0.174353 | 0.178471   | -0.977  | 1.0000               |
| 1CriT6 - 1CriT3 | -0.425668 | 0.183689   | -2.317  | 0.6559               |
| 2SanT1 - 1CriT3 | 0.013245  | 0.162761   | 0.081   | 1.0000               |
| 2SanT2 - 1CriT3 | -0.143101 | 0.169464   | -0.844  | 1.0000               |
| 2SanT3 - 1CriT3 | -0.499776 | 0.197419   | -2.532  | 0.4909               |
| 2SanT4 - 1CriT3 | 0.039221  | 0.161722   | 0.243   | 1.0000               |
| 2SanT5 - 1CriT3 | -0.127833 | 0.168775   | -0.757  | 1.0000               |
| 2SanT6 - 1CriT3 | -0.407968 | 0.175719   | -2.322  | 0.6534               |
| 3RevT1 - 1CriT3 | -0.644357 | 0.188562   | -3.417  | 0.0577               |
| 3RevT2 - 1CriT3 | -0.556288 | 0.191283   | -2.908  | 0.2345               |
| 3RevT3 - 1CriT3 | -0.405465 | 0.182574   | -2.221  | 0.7274               |
| 3RevT4 - 1CriT3 | -0.310155 | 0.177525   | -1.747  | 0.9535               |
| 3RevT5 - 1CriT3 | -1.139434 | 0.234521   | -4.859  | <b>&lt;0.001 ***</b> |
| 3RevT6 - 1CriT3 | -1.860752 | 0.336650   | -5.527  | <b>&lt;0.001 ***</b> |
| 1CriT5 - 1CriT4 | -0.061558 | 0.182877   | -0.337  | 1.0000               |
| 1CriT6 - 1CriT4 | -0.312872 | 0.187972   | -1.664  | 0.9704               |
| 2SanT1 - 1CriT4 | 0.126041  | 0.167581   | 0.752   | 1.0000               |
| 2SanT2 - 1CriT4 | -0.030305 | 0.174098   | -0.174  | 1.0000               |

|                 |           |          |        |                      |
|-----------------|-----------|----------|--------|----------------------|
| 2SanT3 - 1CriT4 | -0.386980 | 0.201411 | -1.921 | 0.8979               |
| 2SanT4 - 1CriT4 | 0.152016  | 0.166571 | 0.913  | 1.0000               |
| 2SanT5 - 1CriT4 | -0.015038 | 0.173427 | -0.087 | 1.0000               |
| 2SanT6 - 1CriT4 | -0.295173 | 0.180192 | -1.638 | 0.9750               |
| 3RevT1 - 1CriT4 | -0.531562 | 0.192737 | -2.758 | 0.3286               |
| 3RevT2 - 1CriT4 | -0.443493 | 0.195400 | -2.270 | 0.6907               |
| 3RevT3 - 1CriT4 | -0.292670 | 0.186883 | -1.566 | 0.9840               |
| 3RevT4 - 1CriT4 | -0.197359 | 0.181954 | -1.085 | 0.9998               |
| 3RevT5 - 1CriT4 | -1.026639 | 0.237891 | -4.316 | <b>&lt;0.01 **</b>   |
| 3RevT6 - 1CriT4 | -1.747957 | 0.339006 | -5.156 | <b>&lt;0.001 ***</b> |
| 1CriT6 - 1CriT5 | -0.251314 | 0.197298 | -1.274 | 0.9985               |
| 2SanT1 - 1CriT5 | 0.187599  | 0.177979 | 1.054  | 0.9999               |
| 2SanT2 - 1CriT5 | 0.031253  | 0.184128 | 0.170  | 1.0000               |
| 2SanT3 - 1CriT5 | -0.325422 | 0.210142 | -1.549 | 0.9858               |
| 2SanT4 - 1CriT5 | 0.213574  | 0.177028 | 1.206  | 0.9992               |
| 2SanT5 - 1CriT5 | 0.046520  | 0.183494 | 0.254  | 1.0000               |
| 2SanT6 - 1CriT5 | -0.233615 | 0.189901 | -1.230 | 0.9990               |
| 3RevT1 - 1CriT5 | -0.470004 | 0.201843 | -2.329 | 0.6486               |
| 3RevT2 - 1CriT5 | -0.381935 | 0.204388 | -1.869 | 0.9181               |
| 3RevT3 - 1CriT5 | -0.231112 | 0.196261 | -1.178 | 0.9994               |
| 3RevT4 - 1CriT5 | -0.135802 | 0.191573 | -0.709 | 1.0000               |
| 3RevT5 - 1CriT5 | -0.965081 | 0.245327 | -3.934 | <b>&lt;0.01 **</b>   |
| 3RevT6 - 1CriT5 | -1.686399 | 0.344265 | -4.899 | <b>&lt;0.001 ***</b> |
| 2SanT1 - 1CriT6 | 0.438913  | 0.183210 | 2.396  | 0.5967               |
| 2SanT2 - 1CriT6 | 0.282567  | 0.189190 | 1.494  | 0.9904               |
| 2SanT3 - 1CriT6 | -0.074108 | 0.214591 | -0.345 | 1.0000               |
| 2SanT4 - 1CriT6 | 0.464889  | 0.182287 | 2.550  | 0.4752               |
| 2SanT5 - 1CriT6 | 0.297834  | 0.188573 | 1.579  | 0.9825               |
| 2SanT6 - 1CriT6 | 0.017700  | 0.194813 | 0.091  | 1.0000               |
| 3RevT1 - 1CriT6 | -0.218689 | 0.206471 | -1.059 | 0.9999               |
| 3RevT2 - 1CriT6 | -0.130620 | 0.208959 | -0.625 | 1.0000               |
| 3RevT3 - 1CriT6 | 0.020203  | 0.201018 | 0.101  | 1.0000               |
| 3RevT4 - 1CriT6 | 0.115513  | 0.196443 | 0.588  | 1.0000               |
| 3RevT5 - 1CriT6 | -0.713766 | 0.249148 | -2.865 | 0.2626               |
| 3RevT6 - 1CriT6 | -1.435085 | 0.346999 | -4.136 | <b>&lt;0.01 **</b>   |
| 2SanT2 - 2SanT1 | -0.156346 | 0.168945 | -0.925 | 1.0000               |
| 2SanT3 - 2SanT1 | -0.513021 | 0.196974 | -2.605 | 0.4336               |
| 2SanT4 - 2SanT1 | 0.025975  | 0.161178 | 0.161  | 1.0000               |
| 2SanT5 - 2SanT1 | -0.141079 | 0.168254 | -0.838 | 1.0000               |
| 2SanT6 - 2SanT1 | -0.421213 | 0.175219 | -2.404 | 0.5898               |
| 3RevT1 - 2SanT1 | -0.657602 | 0.188096 | -3.496 | <b>0.0454 *</b>      |
| 3RevT2 - 2SanT1 | -0.569533 | 0.190824 | -2.985 | 0.1961               |
| 3RevT3 - 2SanT1 | -0.418710 | 0.182093 | -2.299 | 0.6697               |
| 3RevT4 - 2SanT1 | -0.323400 | 0.177030 | -1.827 | 0.9321               |
| 3RevT5 - 2SanT1 | -1.152680 | 0.234146 | -4.923 | <b>&lt;0.001 ***</b> |
| 3RevT6 - 2SanT1 | -1.873998 | 0.336389 | -5.571 | <b>&lt;0.001 ***</b> |
| 2SanT3 - 2SanT2 | -0.356675 | 0.202548 | -1.761 | 0.9503               |
| 2SanT4 - 2SanT2 | 0.182322  | 0.167944 | 1.086  | 0.9998               |
| 2SanT5 - 2SanT2 | 0.015267  | 0.174746 | 0.087  | 1.0000               |
| 2SanT6 - 2SanT2 | -0.264867 | 0.181462 | -1.460 | 0.9925               |
| 3RevT1 - 2SanT2 | -0.501256 | 0.193925 | -2.585 | 0.4500               |
| 3RevT2 - 2SanT2 | -0.413187 | 0.196572 | -2.102 | 0.8051               |
| 3RevT3 - 2SanT2 | -0.262364 | 0.188108 | -1.395 | 0.9955               |
| 3RevT4 - 2SanT2 | -0.167054 | 0.183211 | -0.912 | 1.0000               |
| 3RevT5 - 2SanT2 | -0.996333 | 0.238854 | -4.171 | <b>&lt;0.01 **</b>   |
| 3RevT6 - 2SanT2 | -1.717651 | 0.339683 | -5.057 | <b>&lt;0.001 ***</b> |

|                 |           |          |        |                      |
|-----------------|-----------|----------|--------|----------------------|
| 2SanT4 - 2SanT3 | 0.538997  | 0.196116 | 2.748  | 0.3341               |
| 2SanT5 - 2SanT3 | 0.371942  | 0.201972 | 1.842  | 0.9268               |
| 2SanT6 - 2SanT3 | 0.091808  | 0.207810 | 0.442  | 1.0000               |
| 3RevT1 - 2SanT3 | -0.144581 | 0.218777 | -0.661 | 1.0000               |
| 3RevT2 - 2SanT3 | -0.056512 | 0.221126 | -0.256 | 1.0000               |
| 3RevT3 - 2SanT3 | 0.094311  | 0.213638 | 0.441  | 1.0000               |
| 3RevT4 - 2SanT3 | 0.189621  | 0.209339 | 0.906  | 1.0000               |
| 3RevT5 - 2SanT3 | -0.639658 | 0.259437 | -2.466 | 0.5409               |
| 3RevT6 - 2SanT3 | -1.360977 | 0.354459 | -3.840 | <b>0.0140 *</b>      |
| 2SanT5 - 2SanT4 | -0.167054 | 0.167248 | -0.999 | 0.9999               |
| 2SanT6 - 2SanT4 | -0.447189 | 0.174254 | -2.566 | 0.4640               |
| 3RevT1 - 2SanT4 | -0.683578 | 0.187197 | -3.652 | <b>0.0273 *</b>      |
| 3RevT2 - 2SanT4 | -0.595509 | 0.189938 | -3.135 | 0.1332               |
| 3RevT3 - 2SanT4 | -0.444686 | 0.181164 | -2.455 | 0.5500               |
| 3RevT4 - 2SanT4 | -0.349376 | 0.176075 | -1.984 | 0.8695               |
| 3RevT5 - 2SanT4 | -1.178655 | 0.233425 | -5.049 | <b>&lt;0.001 ***</b> |
| 3RevT6 - 2SanT4 | -1.899973 | 0.335888 | -5.657 | <b>&lt;0.001 ***</b> |
| 3RevT1 - 2SanT5 | -0.516524 | 0.193323 | -2.672 | 0.3859               |
| 3RevT2 - 2SanT5 | -0.428455 | 0.195978 | -2.186 | 0.7511               |
| 3RevT3 - 2SanT5 | -0.277632 | 0.187487 | -1.481 | 0.9911               |
| 3RevT4 - 2SanT5 | -0.182322 | 0.182574 | -0.999 | 0.9999               |
| 3RevT5 - 2SanT5 | -1.011601 | 0.238366 | -4.244 | <b>&lt;0.01 **</b>   |
| 3RevT6 - 2SanT5 | -1.732919 | 0.339340 | -5.107 | <b>&lt;0.001 ***</b> |
| 3RevT1 - 2SanT6 | -0.236389 | 0.199414 | -1.185 | 0.9994               |
| 3RevT2 - 2SanT6 | -0.148320 | 0.201989 | -0.734 | 1.0000               |
| 3RevT3 - 2SanT6 | 0.002503  | 0.193762 | 0.013  | 1.0000               |
| 3RevT4 - 2SanT6 | 0.097813  | 0.189012 | 0.517  | 1.0000               |
| 3RevT5 - 2SanT6 | -0.731466 | 0.243332 | -3.006 | 0.1868               |
| 3RevT6 - 2SanT6 | -1.452784 | 0.342847 | -4.237 | <b>&lt;0.01 **</b>   |
| 3RevT2 - 3RevT1 | 0.088069  | 0.213256 | 0.413  | 1.0000               |
| 3RevT3 - 3RevT1 | 0.238892  | 0.205480 | 1.163  | 0.9995               |
| 3RevT4 - 3RevT1 | 0.334202  | 0.201008 | 1.663  | 0.9707               |
| 3RevT5 - 3RevT1 | -0.495077 | 0.252763 | -1.959 | 0.8818               |
| 3RevT6 - 3RevT1 | -1.216395 | 0.349603 | -3.479 | <b>0.0486 *</b>      |
| 3RevT3 - 3RevT2 | 0.150823  | 0.207980 | 0.725  | 1.0000               |
| 3RevT4 - 3RevT2 | 0.246133  | 0.203562 | 1.209  | 0.9992               |
| 3RevT5 - 3RevT2 | -0.583146 | 0.254799 | -2.289 | 0.6770               |
| 3RevT6 - 3RevT2 | -1.304464 | 0.351078 | -3.716 | <b>0.0215 *</b>      |
| 3RevT4 - 3RevT3 | 0.095310  | 0.195402 | 0.488  | 1.0000               |
| 3RevT5 - 3RevT3 | -0.733969 | 0.248328 | -2.956 | 0.2120               |
| 3RevT6 - 3RevT3 | -1.455287 | 0.346410 | -4.201 | <b>&lt;0.01 **</b>   |
| 3RevT5 - 3RevT4 | -0.829279 | 0.244639 | -3.390 | 0.0642               |
| 3RevT6 - 3RevT4 | -1.550597 | 0.343776 | -4.510 | <b>&lt;0.001 ***</b> |
| 3RevT6 - 3RevT5 | -0.721318 | 0.376386 | -1.916 | 0.9005               |

**Table S4.** Tukey test comparisons for oak leaves total abundance (N). Significance codes: \*\*\*  $\leq 0.001$ ; \*\*  $\leq 0.01$ ; \*  $\leq 0.05$ .

| Comparison      | Estimate  | Std. Error | Z Value | p-Value    |
|-----------------|-----------|------------|---------|------------|
| 1CriT2 - 1CriT1 | -0.429107 | 0.308835   | -1.389  | 0.9960     |
| 1CriT3 - 1CriT1 | 0.598460  | 0.303820   | 1.970   | 0.8825     |
| 1CriT4 - 1CriT1 | -0.018868 | 0.306217   | -0.062  | 1.0000     |
| 1CriT5 - 1CriT1 | 0.439494  | 0.316585   | 1.388   | 0.9961     |
| 1CriT6 - 1CriT1 | 0.840600  | 0.303214   | 2.772   | 0.3286     |
| 2SanT1 - 1CriT1 | 0.009302  | 0.306073   | 0.030   | 1.0000     |
| 2SanT2 - 1CriT1 | -0.282503 | 0.307777   | -0.918  | 1.0000     |
| 2SanT3 - 1CriT1 | 0.166535  | 0.317744   | 0.524   | 1.0000     |
| 2SanT4 - 1CriT1 | 0.811968  | 0.303278   | 2.677   | 0.3916     |
| 2SanT5 - 1CriT1 | 0.275931  | 0.304891   | 0.905   | 1.0000     |
| 2SanT6 - 1CriT1 | 0.529574  | 0.294503   | 1.798   | 0.9442     |
| 3RevT1 - 1CriT1 | -0.441141 | 0.298939   | -1.476  | 0.9921     |
| 3RevT2 - 1CriT1 | -0.524417 | 0.309609   | -1.694  | 0.9676     |
| 3RevT3 - 1CriT1 | -0.760806 | 0.311867   | -2.440  | 0.5747     |
| 3RevT4 - 1CriT1 | 0.501436  | 0.304107   | 1.649   | 0.9750     |
| 3RevT5 - 1CriT1 | -2.370244 | 0.352034   | -6.733  | <0.001 *** |
| 3RevT6 - 1CriT1 | -2.359194 | 0.369250   | -6.389  | <0.001 *** |
| 1CriT3 - 1CriT2 | 1.027567  | 0.306555   | 3.352   | 0.0754     |
| 1CriT4 - 1CriT2 | 0.410238  | 0.308931   | 1.328   | 0.9977     |
| 1CriT5 - 1CriT2 | 0.868600  | 0.319211   | 2.721   | 0.3623     |
| 1CriT6 - 1CriT2 | 1.269707  | 0.305954   | 4.150   | <0.01 **   |
| 2SanT1 - 1CriT2 | 0.438409  | 0.308788   | 1.420   | 0.9949     |
| 2SanT2 - 1CriT2 | 0.146603  | 0.310477   | 0.472   | 1.0000     |
| 2SanT3 - 1CriT2 | 0.595642  | 0.320360   | 1.859   | 0.9260     |
| 2SanT4 - 1CriT2 | 1.241075  | 0.306018   | 4.056   | <0.01 **   |
| 2SanT5 - 1CriT2 | 0.705038  | 0.307616   | 2.292   | 0.6857     |
| 2SanT6 - 1CriT2 | 0.958681  | 0.297324   | 3.224   | 0.1096     |
| 3RevT1 - 1CriT2 | -0.012034 | 0.301718   | -0.040  | 1.0000     |
| 3RevT2 - 1CriT2 | -0.095310 | 0.312293   | -0.305  | 1.0000     |
| 3RevT3 - 1CriT2 | -0.331699 | 0.314532   | -1.055  | 0.9999     |
| 3RevT4 - 1CriT2 | 0.930543  | 0.306840   | 3.033   | 0.1844     |
| 3RevT5 - 1CriT2 | -1.941137 | 0.354397   | -5.477  | <0.001 *** |
| 3RevT6 - 1CriT2 | -1.930087 | 0.371504   | -5.195  | <0.001 *** |
| 1CriT4 - 1CriT3 | -0.617328 | 0.303918   | -2.031  | 0.8527     |
| 1CriT5 - 1CriT3 | -0.158966 | 0.314362   | -0.506  | 1.0000     |
| 1CriT6 - 1CriT3 | 0.242140  | 0.300891   | 0.805   | 1.0000     |
| 2SanT1 - 1CriT3 | -0.589157 | 0.303773   | -1.939  | 0.8952     |
| 2SanT2 - 1CriT3 | -0.880963 | 0.305489   | -2.884  | 0.2590     |
| 2SanT3 - 1CriT3 | -0.431925 | 0.315529   | -1.369  | 0.9967     |
| 2SanT4 - 1CriT3 | 0.213508  | 0.300956   | 0.709   | 1.0000     |
| 2SanT5 - 1CriT3 | -0.322529 | 0.302581   | -1.066  | 0.9999     |
| 2SanT6 - 1CriT3 | -0.068886 | 0.292112   | -0.236  | 1.0000     |
| 3RevT1 - 1CriT3 | -1.039601 | 0.296583   | -3.505  | 0.0467 *   |
| 3RevT2 - 1CriT3 | -1.122877 | 0.307335   | -3.654  | 0.0286 *   |
| 3RevT3 - 1CriT3 | -1.359266 | 0.309610   | -4.390  | <0.01 **   |
| 3RevT4 - 1CriT3 | -0.097024 | 0.301792   | -0.321  | 1.0000     |
| 3RevT5 - 1CriT3 | -2.968704 | 0.350035   | -8.481  | <0.001 *** |
| 3RevT6 - 1CriT3 | -2.957654 | 0.367346   | -8.051  | <0.001 *** |
| 1CriT5 - 1CriT4 | 0.458362  | 0.316679   | 1.447   | 0.9936     |
| 1CriT6 - 1CriT4 | 0.859468  | 0.303311   | 2.834   | 0.2890     |
| 2SanT1 - 1CriT4 | 0.028171  | 0.306170   | 0.092   | 1.0000     |
| 2SanT2 - 1CriT4 | -0.263635 | 0.307873   | -0.856  | 1.0000     |

|                 |           |          |        |                      |
|-----------------|-----------|----------|--------|----------------------|
| 2SanT3 - 1CriT4 | 0.185403  | 0.317837 | 0.583  | 1.0000               |
| 2SanT4 - 1CriT4 | 0.830837  | 0.303376 | 2.739  | 0.3511               |
| 2SanT5 - 1CriT4 | 0.294800  | 0.304988 | 0.967  | 1.0000               |
| 2SanT6 - 1CriT4 | 0.548442  | 0.294604 | 1.862  | 0.9245               |
| 3RevT1 - 1CriT4 | -0.422272 | 0.299038 | -1.412 | 0.9952               |
| 3RevT2 - 1CriT4 | -0.505549 | 0.309705 | -1.632 | 0.9774               |
| 3RevT3 - 1CriT4 | -0.741937 | 0.311962 | -2.378 | 0.6228               |
| 3RevT4 - 1CriT4 | 0.520304  | 0.304205 | 1.710  | 0.9643               |
| 3RevT5 - 1CriT4 | -2.351375 | 0.352118 | -6.678 | <b>&lt;0.001 ***</b> |
| 3RevT6 - 1CriT4 | -2.340325 | 0.369331 | -6.337 | <b>&lt;0.001 ***</b> |
| 1CriT6 - 1CriT5 | 0.401106  | 0.313776 | 1.278  | 0.9985               |
| 2SanT1 - 1CriT5 | -0.430191 | 0.316540 | -1.359 | 0.9969               |
| 2SanT2 - 1CriT5 | -0.721997 | 0.318187 | -2.269 | 0.7046               |
| 2SanT3 - 1CriT5 | -0.272959 | 0.327838 | -0.833 | 1.0000               |
| 2SanT4 - 1CriT5 | 0.372475  | 0.313838 | 1.187  | 0.9994               |
| 2SanT5 - 1CriT5 | -0.163563 | 0.315397 | -0.519 | 1.0000               |
| 2SanT6 - 1CriT5 | 0.090080  | 0.305366 | 0.295  | 1.0000               |
| 3RevT1 - 1CriT5 | -0.880634 | 0.309646 | -2.844 | 0.2818               |
| 3RevT2 - 1CriT5 | -0.963911 | 0.319960 | -3.013 | 0.1907               |
| 3RevT3 - 1CriT5 | -1.200299 | 0.322145 | -3.726 | <b>0.0222 *</b>      |
| 3RevT4 - 1CriT5 | 0.061942  | 0.314639 | 0.197  | 1.0000               |
| 3RevT5 - 1CriT5 | -2.809737 | 0.361171 | -7.780 | <b>&lt;0.001 ***</b> |
| 3RevT6 - 1CriT5 | -2.798687 | 0.377972 | -7.404 | <b>&lt;0.001 ***</b> |
| 2SanT1 - 1CriT6 | -0.831298 | 0.303166 | -2.742 | 0.3491               |
| 2SanT2 - 1CriT6 | -1.123103 | 0.304886 | -3.684 | <b>0.0252 *</b>      |
| 2SanT3 - 1CriT6 | -0.674065 | 0.314945 | -2.140 | 0.7905               |
| 2SanT4 - 1CriT6 | -0.028632 | 0.300344 | -0.095 | 1.0000               |
| 2SanT5 - 1CriT6 | -0.564669 | 0.301972 | -1.870 | 0.9224               |
| 2SanT6 - 1CriT6 | -0.311026 | 0.291481 | -1.067 | 0.9999               |
| 3RevT1 - 1CriT6 | -1.281741 | 0.295961 | -4.331 | <b>&lt;0.01 **</b>   |
| 3RevT2 - 1CriT6 | -1.365017 | 0.306735 | -4.450 | <b>&lt;0.01 **</b>   |
| 3RevT3 - 1CriT6 | -1.601406 | 0.309014 | -5.182 | <b>&lt;0.001 ***</b> |
| 3RevT4 - 1CriT6 | -0.339164 | 0.301181 | -1.126 | 0.9997               |
| 3RevT5 - 1CriT6 | -3.210844 | 0.349509 | -9.187 | <b>&lt;0.001 ***</b> |
| 3RevT6 - 1CriT6 | -3.199794 | 0.366844 | -8.722 | <b>&lt;0.001 ***</b> |
| 2SanT2 - 2SanT1 | -0.291806 | 0.307730 | -0.948 | 1.0000               |
| 2SanT3 - 2SanT1 | 0.157232  | 0.317699 | 0.495  | 1.0000               |
| 2SanT4 - 2SanT1 | 0.802666  | 0.303230 | 2.647  | 0.4164               |
| 2SanT5 - 2SanT1 | 0.266629  | 0.304844 | 0.875  | 1.0000               |
| 2SanT6 - 2SanT1 | 0.520272  | 0.294454 | 1.767  | 0.9519               |
| 3RevT1 - 2SanT1 | -0.450443 | 0.298890 | -1.507 | 0.9902               |
| 3RevT2 - 2SanT1 | -0.533719 | 0.309562 | -1.724 | 0.9615               |
| 3RevT3 - 2SanT1 | -0.770108 | 0.311821 | -2.470 | 0.5509               |
| 3RevT4 - 2SanT1 | 0.492133  | 0.304060 | 1.619  | 0.9792               |
| 3RevT5 - 2SanT1 | -2.379546 | 0.351993 | -6.760 | <b>&lt;0.001 ***</b> |
| 3RevT6 - 2SanT1 | -2.368496 | 0.369211 | -6.415 | <b>&lt;0.001 ***</b> |
| 2SanT3 - 2SanT2 | 0.449038  | 0.319340 | 1.406  | 0.9954               |
| 2SanT4 - 2SanT2 | 1.094471  | 0.304950 | 3.589  | <b>0.0348 *</b>      |
| 2SanT5 - 2SanT2 | 0.558434  | 0.306554 | 1.822  | 0.9373               |
| 2SanT6 - 2SanT2 | 0.812077  | 0.296225 | 2.741  | 0.3480               |
| 3RevT1 - 2SanT2 | -0.158637 | 0.300635 | -0.528 | 1.0000               |
| 3RevT2 - 2SanT2 | -0.241914 | 0.311247 | -0.777 | 1.0000               |
| 3RevT3 - 2SanT2 | -0.478302 | 0.313493 | -1.526 | 0.9888               |
| 3RevT4 - 2SanT2 | 0.783939  | 0.305775 | 2.564  | 0.4791               |
| 3RevT5 - 2SanT2 | -2.087740 | 0.353475 | -5.906 | <b>&lt;0.001 ***</b> |
| 3RevT6 - 2SanT2 | -2.076691 | 0.370625 | -5.603 | <b>&lt;0.001 ***</b> |



|                 |           |          |        |                      |
|-----------------|-----------|----------|--------|----------------------|
| 2SanT4 - 2SanT3 | 0.645433  | 0.315007 | 2.049  | 0.8429               |
| 2SanT5 - 2SanT3 | 0.109396  | 0.316560 | 0.346  | 1.0000               |
| 2SanT6 - 2SanT3 | 0.363039  | 0.306568 | 1.184  | 0.9994               |
| 3RevT1 - 2SanT3 | -0.607675 | 0.310831 | -1.955 | 0.8889               |
| 3RevT2 - 2SanT3 | -0.690952 | 0.321106 | -2.152 | 0.7828               |
| 3RevT3 - 2SanT3 | -0.927341 | 0.323284 | -2.868 | 0.2682               |
| 3RevT4 - 2SanT3 | 0.334901  | 0.315805 | 1.060  | 0.9999               |
| 3RevT5 - 2SanT3 | -2.536778 | 0.362187 | -7.004 | <b>&lt;0.001 ***</b> |
| 3RevT6 - 2SanT3 | -2.525729 | 0.378943 | -6.665 | <b>&lt;0.001 ***</b> |
| 2SanT5 - 2SanT4 | -0.536037 | 0.302037 | -1.775 | 0.9502               |
| 2SanT6 - 2SanT4 | -0.282394 | 0.291548 | -0.969 | 1.0000               |
| 3RevT1 - 2SanT4 | -1.253109 | 0.296027 | -4.233 | <b>&lt;0.01 **</b>   |
| 3RevT2 - 2SanT4 | -1.336385 | 0.306799 | -4.356 | <b>&lt;0.01 **</b>   |
| 3RevT3 - 2SanT4 | -1.572774 | 0.309078 | -5.089 | <b>&lt;0.001 ***</b> |
| 3RevT4 - 2SanT4 | -0.310532 | 0.301246 | -1.031 | 0.9999               |
| 3RevT5 - 2SanT4 | -3.182212 | 0.349565 | -9.103 | <b>&lt;0.001 ***</b> |
| 3RevT6 - 2SanT4 | -3.171162 | 0.366897 | -8.643 | <b>&lt;0.001 ***</b> |
| 2SanT6 - 2SanT5 | 0.253643  | 0.293225 | 0.865  | 1.0000               |
| 3RevT1 - 2SanT5 | -0.717072 | 0.297679 | -2.409 | 0.5974               |
| 3RevT2 - 2SanT5 | -0.800348 | 0.308393 | -2.595 | 0.4548               |
| 3RevT3 - 2SanT5 | -1.036737 | 0.310660 | -3.337 | 0.0798               |
| 3RevT4 - 2SanT5 | 0.225505  | 0.302870 | 0.745  | 1.0000               |
| 3RevT5 - 2SanT5 | -2.646175 | 0.350965 | -7.540 | <b>&lt;0.001 ***</b> |
| 3RevT6 - 2SanT5 | -2.635125 | 0.368232 | -7.156 | <b>&lt;0.001 ***</b> |
| 3RevT1 - 2SanT6 | -0.970715 | 0.287031 | -3.382 | 0.0690               |
| 3RevT2 - 2SanT6 | -1.053991 | 0.298127 | -3.535 | <b>0.0430 *</b>      |
| 3RevT3 - 2SanT6 | -1.290380 | 0.300472 | -4.295 | <b>&lt;0.01 **</b>   |
| 3RevT4 - 2SanT6 | -0.028138 | 0.292410 | -0.096 | 1.0000               |
| 3RevT5 - 2SanT6 | -2.899818 | 0.341980 | -8.480 | <b>&lt;0.001 ***</b> |
| 3RevT6 - 2SanT6 | -2.888768 | 0.359678 | -8.032 | <b>&lt;0.001 ***</b> |
| 3RevT2 - 3RevT1 | -0.083276 | 0.302510 | -0.275 | 1.0000               |
| 3RevT3 - 3RevT1 | -0.319665 | 0.304821 | -1.049 | 0.9999               |
| 3RevT4 - 3RevT1 | 0.942577  | 0.296877 | 3.175  | 0.1262               |
| 3RevT5 - 3RevT1 | -1.929103 | 0.345807 | -5.579 | <b>&lt;0.001 ***</b> |
| 3RevT6 - 3RevT1 | -1.918053 | 0.363319 | -5.279 | <b>&lt;0.001 ***</b> |
| 3RevT3 - 3RevT2 | -0.236389 | 0.315292 | -0.750 | 1.0000               |
| 3RevT4 - 3RevT2 | 1.025853  | 0.307618 | 3.335  | 0.0806               |
| 3RevT5 - 3RevT2 | -1.845827 | 0.355071 | -5.198 | <b>&lt;0.001 ***</b> |
| 3RevT6 - 3RevT2 | -1.834777 | 0.372148 | -4.930 | <b>&lt;0.001 ***</b> |
| 3RevT4 - 3RevT3 | 1.262242  | 0.309891 | 4.073  | <b>&lt;0.01 **</b>   |
| 3RevT5 - 3RevT3 | -1.609438 | 0.357042 | -4.508 | <b>&lt;0.001 ***</b> |
| 3RevT6 - 3RevT3 | -1.598388 | 0.374028 | -4.273 | <b>&lt;0.01 **</b>   |
| 3RevT5 - 3RevT4 | -2.871680 | 0.350285 | -8.198 | <b>&lt;0.001 ***</b> |
| 3RevT6 - 3RevT4 | -2.860630 | 0.367583 | -7.782 | <b>&lt;0.001 ***</b> |
| 3RevT6 - 3RevT5 | 0.011050  | 0.408122 | 0.027  | 1.0000               |

**Table S5.** Tukey test comparisons for oak leaves EPT richness (EPTS). Significance codes: \*\*\*  $\leq 0.001$ ; \*\*  $\leq 0.01$ ; \*  $\leq 0.05$ .

| Comparison      | Estimate | Std. Error | Z Value | p-Value            |
|-----------------|----------|------------|---------|--------------------|
| 1CriT2 - 1CriT1 | -0.19845 | 0.21069    | -0.942  | 1.0000             |
| 1CriT3 - 1CriT1 | -0.10536 | 0.20548    | -0.513  | 1.0000             |
| 1CriT4 - 1CriT1 | -0.12783 | 0.20671    | -0.618  | 1.0000             |
| 1CriT5 - 1CriT1 | -0.29214 | 0.22638    | -1.290  | 0.9981             |
| 1CriT6 - 1CriT1 | -0.54473 | 0.23342    | -2.334  | 0.6366             |
| 2SanT1 - 1CriT1 | 0.11333  | 0.19457    | 0.582   | 1.0000             |
| 2SanT2 - 1CriT1 | 0.07696  | 0.19626    | 0.392   | 1.0000             |
| 2SanT3 - 1CriT1 | -0.35667 | 0.23094    | -1.544  | 0.9852             |
| 2SanT4 - 1CriT1 | 0.13103  | 0.19376    | 0.676   | 1.0000             |
| 2SanT5 - 1CriT1 | -0.04082 | 0.20207    | -0.202  | 1.0000             |
| 2SanT6 - 1CriT1 | -0.21691 | 0.20430    | -1.062  | 0.9998             |
| 3RevT1 - 1CriT1 | -0.71335 | 0.23604    | -3.022  | 0.1728             |
| 3RevT2 - 1CriT1 | -0.57982 | 0.23604    | -2.456  | 0.5393             |
| 3RevT3 - 1CriT1 | -0.27444 | 0.21521    | -1.275  | 0.9983             |
| 3RevT4 - 1CriT1 | -0.15082 | 0.20798    | -0.725  | 1.0000             |
| 3RevT5 - 1CriT1 | -1.13943 | 0.28723    | -3.967  | <b>&lt;0.01 **</b> |
| 3RevT6 - 1CriT1 | -3.75787 | 1.00980    | -3.721  | <b>0.0194 *</b>    |
| 1CriT3 - 1CriT2 | 0.09309  | 0.21590    | 0.431   | 1.0000             |
| 1CriT4 - 1CriT2 | 0.07062  | 0.21707    | 0.325   | 1.0000             |
| 1CriT5 - 1CriT2 | -0.09369 | 0.23588    | -0.397  | 1.0000             |
| 1CriT6 - 1CriT2 | -0.34628 | 0.24264    | -1.427  | 0.9936             |
| 2SanT1 - 1CriT2 | 0.31178  | 0.20554    | 1.517   | 0.9876             |
| 2SanT2 - 1CriT2 | 0.27541  | 0.20714    | 1.330   | 0.9972             |
| 2SanT3 - 1CriT2 | -0.15822 | 0.24026    | -0.659  | 1.0000             |
| 2SanT4 - 1CriT2 | 0.32948  | 0.20478    | 1.609   | 0.9772             |
| 2SanT5 - 1CriT2 | 0.15763  | 0.21266    | 0.741   | 1.0000             |
| 2SanT6 - 1CriT2 | -0.01846 | 0.21478    | -0.086  | 1.0000             |
| 3RevT1 - 1CriT2 | -0.51490 | 0.24516    | -2.100  | 0.7985             |
| 3RevT2 - 1CriT2 | -0.38137 | 0.24516    | -1.556  | 0.9837             |
| 3RevT3 - 1CriT2 | -0.07599 | 0.22518    | -0.337  | 1.0000             |
| 3RevT4 - 1CriT2 | 0.04763  | 0.21828    | 0.218   | 1.0000             |
| 3RevT5 - 1CriT2 | -0.94098 | 0.29477    | -3.192  | 0.1115             |
| 3RevT6 - 1CriT2 | -3.55942 | 1.01198    | -3.517  | <b>0.0407 *</b>    |
| 1CriT4 - 1CriT3 | -0.02247 | 0.21201    | -0.106  | 1.0000             |
| 1CriT5 - 1CriT3 | -0.18678 | 0.23124    | -0.808  | 1.0000             |
| 1CriT6 - 1CriT3 | -0.43937 | 0.23813    | -1.845  | 0.9228             |
| 2SanT1 - 1CriT3 | 0.21869  | 0.20020    | 1.092   | 0.9998             |
| 2SanT2 - 1CriT3 | 0.18232  | 0.20184    | 0.903   | 1.0000             |
| 2SanT3 - 1CriT3 | -0.25131 | 0.23570    | -1.066  | 0.9998             |
| 2SanT4 - 1CriT3 | 0.23639  | 0.19941    | 1.185   | 0.9993             |
| 2SanT5 - 1CriT3 | 0.06454  | 0.20750    | 0.311   | 1.0000             |
| 2SanT6 - 1CriT3 | -0.11155 | 0.20967    | -0.532  | 1.0000             |
| 3RevT1 - 1CriT3 | -0.60799 | 0.24070    | -2.526  | 0.4840             |
| 3RevT2 - 1CriT3 | -0.47446 | 0.24070    | -1.971  | 0.8696             |
| 3RevT3 - 1CriT3 | -0.16908 | 0.22031    | -0.767  | 1.0000             |
| 3RevT4 - 1CriT3 | -0.04546 | 0.21326    | -0.213  | 1.0000             |
| 3RevT5 - 1CriT3 | -1.03407 | 0.29107    | -3.553  | <b>0.0363 *</b>    |
| 3RevT6 - 1CriT3 | -3.65251 | 1.01090    | -3.613  | <b>0.0293 *</b>    |
| 1CriT5 - 1CriT4 | -0.16430 | 0.23233    | -0.707  | 1.0000             |
| 1CriT6 - 1CriT4 | -0.41689 | 0.23919    | -1.743  | 0.9524             |
| 2SanT1 - 1CriT4 | 0.24116  | 0.20146    | 1.197   | 0.9992             |
| 2SanT2 - 1CriT4 | 0.20479  | 0.20309    | 1.008   | 0.9999             |

|                 |          |         |        |                    |
|-----------------|----------|---------|--------|--------------------|
| 2SanT3 - 1CriT4 | -0.22884 | 0.23677 | -0.967 | 1.0000             |
| 2SanT4 - 1CriT4 | 0.25886  | 0.20068 | 1.290  | 0.9981             |
| 2SanT5 - 1CriT4 | 0.08701  | 0.20871 | 0.417  | 1.0000             |
| 2SanT6 - 1CriT4 | -0.08908 | 0.21087 | -0.422 | 1.0000             |
| 3RevT1 - 1CriT4 | -0.58552 | 0.24175 | -2.422 | 0.5657             |
| 3RevT2 - 1CriT4 | -0.45199 | 0.24175 | -1.870 | 0.9126             |
| 3RevT3 - 1CriT4 | -0.14660 | 0.22146 | -0.662 | 1.0000             |
| 3RevT4 - 1CriT4 | -0.02299 | 0.21444 | -0.107 | 1.0000             |
| 3RevT5 - 1CriT4 | -1.01160 | 0.29194 | -3.465 | <b>0.0482 *</b>    |
| 3RevT6 - 1CriT4 | -3.63004 | 1.01115 | -3.590 | <b>0.0330 *</b>    |
| 1CriT6 - 1CriT5 | -0.25259 | 0.25638 | -0.985 | 0.9999             |
| 2SanT1 - 1CriT5 | 0.40547  | 0.22160 | 1.830  | 0.9272             |
| 2SanT2 - 1CriT5 | 0.36910  | 0.22309 | 1.654  | 0.9705             |
| 2SanT3 - 1CriT5 | -0.06454 | 0.25413 | -0.254 | 1.0000             |
| 2SanT4 - 1CriT5 | 0.42316  | 0.22089 | 1.916  | 0.8953             |
| 2SanT5 - 1CriT5 | 0.25131  | 0.22822 | 1.101  | 0.9997             |
| 2SanT6 - 1CriT5 | 0.07522  | 0.23019 | 0.327  | 1.0000             |
| 3RevT1 - 1CriT5 | -0.42121 | 0.25877 | -1.628 | 0.9747             |
| 3RevT2 - 1CriT5 | -0.28768 | 0.25877 | -1.112 | 0.9997             |
| 3RevT3 - 1CriT5 | 0.01770  | 0.23993 | 0.074  | 1.0000             |
| 3RevT4 - 1CriT5 | 0.14131  | 0.23346 | 0.605  | 1.0000             |
| 3RevT5 - 1CriT5 | -0.84730 | 0.30619 | -2.767 | 0.3128             |
| 3RevT6 - 1CriT5 | -3.46574 | 1.01536 | -3.413 | 0.0557             |
| 2SanT1 - 1CriT6 | 0.65806  | 0.22878 | 2.876  | 0.2467             |
| 2SanT2 - 1CriT6 | 0.62169  | 0.23022 | 2.700  | 0.3560             |
| 2SanT3 - 1CriT6 | 0.18805  | 0.26042 | 0.722  | 1.0000             |
| 2SanT4 - 1CriT6 | 0.67576  | 0.22809 | 2.963  | 0.2015             |
| 2SanT5 - 1CriT6 | 0.50391  | 0.23519 | 2.143  | 0.7717             |
| 2SanT6 - 1CriT6 | 0.32781  | 0.23711 | 1.383  | 0.9956             |
| 3RevT1 - 1CriT6 | -0.16862 | 0.26495 | -0.636 | 1.0000             |
| 3RevT2 - 1CriT6 | -0.03509 | 0.26495 | -0.132 | 1.0000             |
| 3RevT3 - 1CriT6 | 0.27029  | 0.24657 | 1.096  | 0.9998             |
| 3RevT4 - 1CriT6 | 0.39390  | 0.24029 | 1.639  | 0.9728             |
| 3RevT5 - 1CriT6 | -0.59471 | 0.31142 | -1.910 | 0.8972             |
| 3RevT6 - 1CriT6 | -3.21315 | 1.01695 | -3.160 | 0.1206             |
| 2SanT2 - 2SanT1 | -0.03637 | 0.19072 | -0.191 | 1.0000             |
| 2SanT3 - 2SanT1 | -0.47000 | 0.22625 | -2.077 | 0.8132             |
| 2SanT4 - 2SanT1 | 0.01770  | 0.18815 | 0.094  | 1.0000             |
| 2SanT5 - 2SanT1 | -0.15415 | 0.19670 | -0.784 | 1.0000             |
| 2SanT6 - 2SanT1 | -0.33024 | 0.19899 | -1.660 | 0.9695             |
| 3RevT1 - 2SanT1 | -0.82668 | 0.23145 | -3.572 | <b>0.0339 *</b>    |
| 3RevT2 - 2SanT1 | -0.69315 | 0.23146 | -2.995 | 0.1865             |
| 3RevT3 - 2SanT1 | -0.38777 | 0.21017 | -1.845 | 0.9216             |
| 3RevT4 - 2SanT1 | -0.26415 | 0.20276 | -1.303 | 0.9978             |
| 3RevT5 - 2SanT1 | -1.25276 | 0.28347 | -4.419 | <b>&lt;0.01 **</b> |
| 3RevT6 - 2SanT1 | -3.87120 | 1.00874 | -3.838 | <b>0.0131 *</b>    |
| 2SanT3 - 2SanT2 | -0.43364 | 0.22771 | -1.904 | 0.8996             |
| 2SanT4 - 2SanT2 | 0.05407  | 0.18990 | 0.285  | 1.0000             |
| 2SanT5 - 2SanT2 | -0.11778 | 0.19837 | -0.594 | 1.0000             |
| 2SanT6 - 2SanT2 | -0.29387 | 0.20064 | -1.465 | 0.9916             |
| 3RevT1 - 2SanT2 | -0.79031 | 0.23288 | -3.394 | 0.0610             |
| 3RevT2 - 2SanT2 | -0.65678 | 0.23288 | -2.820 | 0.2796             |
| 3RevT3 - 2SanT2 | -0.35140 | 0.21174 | -1.660 | 0.9695             |
| 3RevT4 - 2SanT2 | -0.22778 | 0.20439 | -1.114 | 0.9997             |
| 3RevT5 - 2SanT2 | -1.21640 | 0.28464 | -4.273 | <b>&lt;0.01 **</b> |
| 3RevT6 - 2SanT2 | -3.83483 | 1.00907 | -3.800 | <b>0.0149 *</b>    |

|                 |          |         |        |                      |
|-----------------|----------|---------|--------|----------------------|
| 2SanT4 - 2SanT3 | 0.48770  | 0.22556 | 2.162  | 0.7583               |
| 2SanT5 - 2SanT3 | 0.31585  | 0.23274 | 1.357  | 0.9965               |
| 2SanT6 - 2SanT3 | 0.13976  | 0.23468 | 0.596  | 1.0000               |
| 3RevT1 - 2SanT3 | -0.35667 | 0.26277 | -1.357 | 0.9965               |
| 3RevT2 - 2SanT3 | -0.22314 | 0.26277 | -0.849 | 1.0000               |
| 3RevT3 - 2SanT3 | 0.08224  | 0.24423 | 0.337  | 1.0000               |
| 3RevT4 - 2SanT3 | 0.20585  | 0.23788 | 0.865  | 1.0000               |
| 3RevT5 - 2SanT3 | -0.78276 | 0.30957 | -2.529 | 0.4836               |
| 3RevT6 - 2SanT3 | -3.40120 | 1.01639 | -3.346 | 0.0699               |
| 2SanT5 - 2SanT4 | -0.17185 | 0.19590 | -0.877 | 1.0000               |
| 2SanT6 - 2SanT4 | -0.34794 | 0.19820 | -1.756 | 0.9492               |
| 3RevT1 - 2SanT4 | -0.84438 | 0.23078 | -3.659 | <b>0.0245 *</b>      |
| 3RevT2 - 2SanT4 | -0.71085 | 0.23078 | -3.080 | 0.1497               |
| 3RevT3 - 2SanT4 | -0.40547 | 0.20943 | -1.936 | 0.8860               |
| 3RevT4 - 2SanT4 | -0.28185 | 0.20199 | -1.395 | 0.9951               |
| 3RevT5 - 2SanT4 | -1.27046 | 0.28292 | -4.491 | <b>&lt;0.001 ***</b> |
| 3RevT6 - 2SanT4 | -3.88890 | 1.00859 | -3.856 | <b>0.0119 *</b>      |
| 2SanT6 - 2SanT5 | -0.17609 | 0.20633 | -0.853 | 1.0000               |
| 3RevT1 - 2SanT5 | -0.67253 | 0.23780 | -2.828 | 0.2742               |
| 3RevT2 - 2SanT5 | -0.53900 | 0.23780 | -2.267 | 0.6845               |
| 3RevT3 - 2SanT5 | -0.23361 | 0.21714 | -1.076 | 0.9998               |
| 3RevT4 - 2SanT5 | -0.11000 | 0.20997 | -0.524 | 1.0000               |
| 3RevT5 - 2SanT5 | -1.09861 | 0.28868 | -3.806 | <b>0.0157 *</b>      |
| 3RevT6 - 2SanT5 | -3.71705 | 1.01022 | -3.679 | <b>0.0239 *</b>      |
| 3RevT1 - 2SanT6 | -0.49644 | 0.23969 | -2.071 | 0.8159               |
| 3RevT2 - 2SanT6 | -0.36291 | 0.23969 | -1.514 | 0.9879               |
| 3RevT3 - 2SanT6 | -0.05752 | 0.21921 | -0.262 | 1.0000               |
| 3RevT4 - 2SanT6 | 0.06609  | 0.21212 | 0.312  | 1.0000               |
| 3RevT5 - 2SanT6 | -0.92252 | 0.29024 | -3.178 | 0.1149               |
| 3RevT6 - 2SanT6 | -3.54096 | 1.01067 | -3.504 | <b>0.0430 *</b>      |
| 3RevT2 - 3RevT1 | 0.13353  | 0.26726 | 0.500  | 1.0000               |
| 3RevT3 - 3RevT1 | 0.43891  | 0.24906 | 1.762  | 0.9474               |
| 3RevT4 - 3RevT1 | 0.56253  | 0.24284 | 2.316  | 0.6479               |
| 3RevT5 - 3RevT1 | -0.42608 | 0.31339 | -1.360 | 0.9963               |
| 3RevT6 - 3RevT1 | -3.04452 | 1.01756 | -2.992 | 0.1858               |
| 3RevT3 - 3RevT2 | 0.30538  | 0.24906 | 1.226  | 0.9990               |
| 3RevT4 - 3RevT2 | 0.42900  | 0.24284 | 1.767  | 0.9459               |
| 3RevT5 - 3RevT2 | -0.55962 | 0.31339 | -1.786 | 0.9407               |
| 3RevT6 - 3RevT2 | -3.17805 | 1.01756 | -3.123 | 0.1339               |
| 3RevT4 - 3RevT3 | 0.12361  | 0.22265 | 0.555  | 1.0000               |
| 3RevT5 - 3RevT3 | -0.86500 | 0.29802 | -2.902 | 0.2331               |
| 3RevT6 - 3RevT3 | -3.48344 | 1.01293 | -3.439 | 0.0517               |
| 3RevT5 - 3RevT4 | -0.98861 | 0.29284 | -3.376 | 0.0659               |
| 3RevT6 - 3RevT4 | -3.60705 | 1.01142 | -3.566 | <b>0.0345 *</b>      |
| 3RevT6 - 3RevT5 | -2.61844 | 1.03063 | -2.541 | 0.4716               |

**Table S6.** Tukey test comparisons for oak leaves EPT abundance (EPTN). Significance codes: \*\*\*  $\leq 0.001$ ; \*\*  $\leq 0.01$ ; \*  $\leq 0.05$ .

| Comparison      | Estimate  | Std. Error | Z Value | p-Value              |
|-----------------|-----------|------------|---------|----------------------|
| 1CriT2 - 1CriT1 | -0.417441 | 0.269899   | -1.547  | 0.9854               |
| 1CriT3 - 1CriT1 | 0.302453  | 0.264110   | 1.145   | 0.9996               |
| 1CriT4 - 1CriT1 | 0.046520  | 0.265724   | 0.175   | 1.0000               |
| 1CriT5 - 1CriT1 | 0.062801  | 0.276418   | 0.227   | 1.0000               |
| 1CriT6 - 1CriT1 | 0.143894  | 0.265062   | 0.543   | 1.0000               |
| 2SanT1 - 1CriT1 | -1.134980 | 0.281367   | -4.034  | <b>&lt;0.01</b> **   |
| 2SanT2 - 1CriT1 | -1.324736 | 0.285914   | -4.633  | <b>&lt;0.001</b> *** |
| 2SanT3 - 1CriT1 | -1.504077 | 0.304783   | -4.935  | <b>&lt;0.001</b> *** |
| 2SanT4 - 1CriT1 | -0.216223 | 0.267857   | -0.807  | 1.0000               |
| 2SanT5 - 1CriT1 | -0.559616 | 0.271599   | -2.060  | 0.8244               |
| 2SanT6 - 1CriT1 | -0.410687 | 0.261015   | -1.573  | 0.9821               |
| 3RevT1 - 1CriT1 | -2.261763 | 0.310204   | -7.291  | <b>&lt;0.001</b> *** |
| 3RevT2 - 1CriT1 | -2.351375 | 0.329375   | -7.139  | <b>&lt;0.001</b> *** |
| 3RevT3 - 1CriT1 | -1.597603 | 0.293989   | -5.434  | <b>&lt;0.001</b> *** |
| 3RevT4 - 1CriT1 | -1.225364 | 0.283434   | -4.323  | <b>&lt;0.01</b> **   |
| 3RevT5 - 1CriT1 | -2.756840 | 0.359613   | -7.666  | <b>&lt;0.001</b> *** |
| 3RevT6 - 1CriT1 | -5.375278 | 1.035403   | -5.191  | <b>&lt;0.001</b> *** |
| 1CriT3 - 1CriT2 | 0.719895  | 0.267974   | 2.686   | 0.3695               |
| 1CriT4 - 1CriT2 | 0.463961  | 0.269565   | 1.721   | 0.9579               |
| 1CriT5 - 1CriT2 | 0.480242  | 0.280112   | 1.714   | 0.9593               |
| 1CriT6 - 1CriT2 | 0.561335  | 0.268912   | 2.087   | 0.8091               |
| 2SanT1 - 1CriT2 | -0.717539 | 0.284996   | -2.518  | 0.4937               |
| 2SanT2 - 1CriT2 | -0.907295 | 0.289487   | -3.134  | 0.1302               |
| 2SanT3 - 1CriT2 | -1.086636 | 0.308137   | -3.526  | <b>0.0396</b> *      |
| 2SanT4 - 1CriT2 | 0.201218  | 0.271668   | 0.741   | 1.0000               |
| 2SanT5 - 1CriT2 | -0.142174 | 0.275357   | -0.516  | 1.0000               |
| 2SanT6 - 1CriT2 | 0.006754  | 0.264924   | 0.025   | 1.0000               |
| 3RevT1 - 1CriT2 | -1.844322 | 0.313500   | -5.883  | <b>&lt;0.001</b> *** |
| 3RevT2 - 1CriT2 | -1.933934 | 0.332481   | -5.817  | <b>&lt;0.001</b> *** |
| 3RevT3 - 1CriT2 | -1.180162 | 0.297464   | -3.967  | <b>&lt;0.01</b> **   |
| 3RevT4 - 1CriT2 | -0.807923 | 0.287038   | -2.815  | 0.2846               |
| 3RevT5 - 1CriT2 | -2.339399 | 0.362460   | -6.454  | <b>&lt;0.001</b> *** |
| 3RevT6 - 1CriT2 | -4.957837 | 1.036395   | -4.784  | <b>&lt;0.001</b> *** |
| 1CriT4 - 1CriT3 | -0.255933 | 0.263768   | -0.970  | 1.0000               |
| 1CriT5 - 1CriT3 | -0.239652 | 0.274538   | -0.873  | 1.0000               |
| 1CriT6 - 1CriT3 | -0.158559 | 0.263101   | -0.603  | 1.0000               |
| 2SanT1 - 1CriT3 | -1.437433 | 0.279520   | -5.143  | <b>&lt;0.001</b> *** |
| 2SanT2 - 1CriT3 | -1.627190 | 0.284097   | -5.728  | <b>&lt;0.001</b> *** |
| 2SanT3 - 1CriT3 | -1.806531 | 0.303079   | -5.961  | <b>&lt;0.001</b> *** |
| 2SanT4 - 1CriT3 | -0.518676 | 0.265917   | -1.951  | 0.8816               |
| 2SanT5 - 1CriT3 | -0.862069 | 0.269685   | -3.197  | 0.1118               |
| 2SanT6 - 1CriT3 | -0.713140 | 0.259023   | -2.753  | 0.3235               |
| 3RevT1 - 1CriT3 | -2.564216 | 0.308530   | -8.311  | <b>&lt;0.001</b> *** |
| 3RevT2 - 1CriT3 | -2.653829 | 0.327799   | -8.096  | <b>&lt;0.001</b> *** |
| 3RevT3 - 1CriT3 | -1.900057 | 0.292222   | -6.502  | <b>&lt;0.001</b> *** |
| 3RevT4 - 1CriT3 | -1.527817 | 0.281601   | -5.425  | <b>&lt;0.001</b> *** |
| 3RevT5 - 1CriT3 | -3.059294 | 0.358170   | -8.541  | <b>&lt;0.001</b> *** |
| 3RevT6 - 1CriT3 | -5.677732 | 1.034903   | -5.486  | <b>&lt;0.001</b> *** |
| 1CriT5 - 1CriT4 | 0.016281  | 0.276092   | 0.059   | 1.0000               |
| 1CriT6 - 1CriT4 | 0.097374  | 0.264722   | 0.368   | 1.0000               |
| 2SanT1 - 1CriT4 | -1.181500 | 0.281046   | -4.204  | <b>&lt;0.01</b> **   |
| 2SanT2 - 1CriT4 | -1.371256 | 0.285598   | -4.801  | <b>&lt;0.001</b> *** |

|                 |           |          |        |                      |
|-----------------|-----------|----------|--------|----------------------|
| 2SanT3 - 1CriT4 | -1.550597 | 0.304487 | -5.092 | <b>&lt;0.001 ***</b> |
| 2SanT4 - 1CriT4 | -0.262743 | 0.267520 | -0.982 | 0.9999               |
| 2SanT5 - 1CriT4 | -0.606136 | 0.271266 | -2.234 | 0.7108               |
| 2SanT6 - 1CriT4 | -0.457207 | 0.260669 | -1.754 | 0.9498               |
| 3RevT1 - 1CriT4 | -2.308283 | 0.309913 | -7.448 | <b>&lt;0.001 ***</b> |
| 3RevT2 - 1CriT4 | -2.397895 | 0.329101 | -7.286 | <b>&lt;0.001 ***</b> |
| 3RevT3 - 1CriT4 | -1.644123 | 0.293682 | -5.598 | <b>&lt;0.001 ***</b> |
| 3RevT4 - 1CriT4 | -1.271884 | 0.283116 | -4.492 | <b>&lt;0.01 **</b>   |
| 3RevT5 - 1CriT4 | -2.803360 | 0.359362 | -7.801 | <b>&lt;0.001 ***</b> |
| 3RevT6 - 1CriT4 | -5.421798 | 1.035316 | -5.237 | <b>&lt;0.001 ***</b> |
| 1CriT6 - 1CriT5 | 0.081093  | 0.275455 | 0.294  | 1.0000               |
| 2SanT1 - 1CriT5 | -1.197781 | 0.291178 | -4.114 | <b>&lt;0.01 **</b>   |
| 2SanT2 - 1CriT5 | -1.387537 | 0.295574 | -4.694 | <b>&lt;0.001 ***</b> |
| 2SanT3 - 1CriT5 | -1.566878 | 0.313863 | -4.992 | <b>&lt;0.001 ***</b> |
| 2SanT4 - 1CriT5 | -0.279024 | 0.278145 | -1.003 | 0.9999               |
| 2SanT5 - 1CriT5 | -0.622417 | 0.281750 | -2.209 | 0.7302               |
| 2SanT6 - 1CriT5 | -0.473488 | 0.271562 | -1.744 | 0.9530               |
| 3RevT1 - 1CriT5 | -2.324564 | 0.319130 | -7.284 | <b>&lt;0.001 ***</b> |
| 3RevT2 - 1CriT5 | -2.414176 | 0.337795 | -7.147 | <b>&lt;0.001 ***</b> |
| 3RevT3 - 1CriT5 | -1.660404 | 0.303392 | -5.473 | <b>&lt;0.001 ***</b> |
| 3RevT4 - 1CriT5 | -1.288165 | 0.293176 | -4.394 | <b>&lt;0.01 **</b>   |
| 3RevT5 - 1CriT5 | -2.819641 | 0.367340 | -7.676 | <b>&lt;0.001 ***</b> |
| 3RevT6 - 1CriT5 | -5.438079 | 1.038112 | -5.238 | <b>&lt;0.001 ***</b> |
| 2SanT1 - 1CriT6 | -1.278874 | 0.280420 | -4.561 | <b>&lt;0.001 ***</b> |
| 2SanT2 - 1CriT6 | -1.468631 | 0.284982 | -5.153 | <b>&lt;0.001 ***</b> |
| 2SanT3 - 1CriT6 | -1.647972 | 0.303909 | -5.423 | <b>&lt;0.01 ***</b>  |
| 2SanT4 - 1CriT6 | -0.360117 | 0.266863 | -1.349 | 0.9967               |
| 2SanT5 - 1CriT6 | -0.703510 | 0.270618 | -2.600 | 0.4322               |
| 2SanT6 - 1CriT6 | -0.554581 | 0.259994 | -2.133 | 0.7802               |
| 3RevT1 - 1CriT6 | -2.405657 | 0.309345 | -7.777 | <b>&lt;0.001 ***</b> |
| 3RevT2 - 1CriT6 | -2.495269 | 0.328567 | -7.594 | <b>&lt;0.001 ***</b> |
| 3RevT3 - 1CriT6 | -1.741498 | 0.293083 | -5.942 | <b>&lt;0.001 ***</b> |
| 3RevT4 - 1CriT6 | -1.369258 | 0.282494 | -4.847 | <b>&lt;0.001 ***</b> |
| 3RevT5 - 1CriT6 | -2.900735 | 0.358873 | -8.083 | <b>&lt;0.001 ***</b> |
| 3RevT6 - 1CriT6 | -5.519173 | 1.035146 | -5.332 | <b>&lt;0.001 ***</b> |
| 2SanT2 - 2SanT1 | -0.189757 | 0.300207 | -0.632 | 1.0000               |
| 2SanT3 - 2SanT1 | -0.369097 | 0.318229 | -1.160 | 0.9995               |
| 2SanT4 - 2SanT1 | 0.918757  | 0.283064 | 3.246  | 0.0954               |
| 2SanT5 - 2SanT1 | 0.575364  | 0.286607 | 2.008  | 0.8533               |
| 2SanT6 - 2SanT1 | 0.724293  | 0.276597 | 2.619  | 0.4189               |
| 3RevT1 - 2SanT1 | -1.126783 | 0.323425 | -3.484 | <b>0.0475 *</b>      |
| 3RevT2 - 2SanT1 | -1.216395 | 0.341856 | -3.558 | <b>0.0362 *</b>      |
| 3RevT3 - 2SanT1 | -0.462624 | 0.307907 | -1.502 | 0.9891               |
| 3RevT4 - 2SanT1 | -0.090384 | 0.297846 | -0.303 | 1.0000               |
| 3RevT5 - 2SanT1 | -1.621860 | 0.371078 | -4.371 | <b>&lt;0.01 **</b>   |
| 3RevT6 - 2SanT1 | -4.240298 | 1.039441 | -4.079 | <b>&lt;0.01 **</b>   |
| 2SanT3 - 2SanT2 | -0.179341 | 0.322257 | -0.557 | 1.0000               |
| 2SanT4 - 2SanT2 | 1.108513  | 0.287584 | 3.855  | <b>0.0126 *</b>      |
| 2SanT5 - 2SanT2 | 0.765121  | 0.291072 | 2.629  | 0.4097               |
| 2SanT6 - 2SanT2 | 0.914049  | 0.281222 | 3.250  | 0.0944               |
| 3RevT1 - 2SanT2 | -0.937027 | 0.327389 | -2.862 | 0.2569               |
| 3RevT2 - 2SanT2 | -1.026639 | 0.345608 | -2.971 | 0.1984               |
| 3RevT3 - 2SanT2 | -0.272867 | 0.312068 | -0.874 | 1.0000               |
| 3RevT4 - 2SanT2 | 0.099372  | 0.302146 | 0.329  | 1.0000               |
| 3RevT5 - 2SanT2 | -1.432104 | 0.374538 | -3.824 | <b>0.0141 *</b>      |
| 3RevT6 - 2SanT2 | -4.050542 | 1.040681 | -3.892 | <b>0.0107 *</b>      |

|                 |           |          |        |                      |
|-----------------|-----------|----------|--------|----------------------|
| 2SanT4 - 2SanT3 | 1.287854  | 0.306350 | 4.204  | <b>&lt;0.01 **</b>   |
| 2SanT5 - 2SanT3 | 0.944462  | 0.309627 | 3.050  | 0.1629               |
| 2SanT6 - 2SanT3 | 1.093390  | 0.300386 | 3.640  | <b>0.0275 *</b>      |
| 3RevT1 - 2SanT3 | -0.757686 | 0.343990 | -2.203 | 0.7317               |
| 3RevT2 - 2SanT3 | -0.847298 | 0.361374 | -2.345 | 0.6276               |
| 3RevT3 - 2SanT3 | -0.093526 | 0.329442 | -0.284 | 1.0000               |
| 3RevT4 - 2SanT3 | 0.278713  | 0.320059 | 0.871  | 1.0000               |
| 3RevT5 - 2SanT3 | -1.252763 | 0.389133 | -3.219 | 0.1044               |
| 3RevT6 - 2SanT3 | -3.871201 | 1.046022 | -3.701 | <b>0.0214 *</b>      |
| 2SanT5 - 2SanT4 | -0.343393 | 0.273356 | -1.256 | 0.9986               |
| 2SanT6 - 2SanT4 | -0.194464 | 0.262843 | -0.740 | 1.0000               |
| 3RevT1 - 2SanT4 | -2.045540 | 0.311744 | -6.562 | <b>&lt;0.001 ***</b> |
| 3RevT2 - 2SanT4 | -2.135152 | 0.330826 | -6.454 | <b>&lt;0.001 ***</b> |
| 3RevT3 - 2SanT4 | -1.381380 | 0.295613 | -4.673 | <b>&lt;0.001 ***</b> |
| 3RevT4 - 2SanT4 | -1.009141 | 0.285119 | -3.539 | <b>0.0390 *</b>      |
| 3RevT5 - 2SanT4 | -2.540617 | 0.360942 | -7.039 | <b>&lt;0.001 ***</b> |
| 3RevT6 - 2SanT4 | -5.159055 | 1.035865 | -4.980 | <b>&lt;0.001 ***</b> |
| 2SanT6 - 2SanT5 | 0.148929  | 0.266655 | 0.559  | 1.0000               |
| 3RevT1 - 2SanT5 | -1.702147 | 0.314964 | -5.404 | <b>&lt;0.001 ***</b> |
| 3RevT2 - 2SanT5 | -1.791759 | 0.333863 | -5.367 | <b>&lt;0.001 ***</b> |
| 3RevT3 - 2SanT5 | -1.037988 | 0.299007 | -3.471 | <b>0.0479 *</b>      |
| 3RevT4 - 2SanT5 | -0.665748 | 0.288637 | -2.307 | 0.6582               |
| 3RevT5 - 2SanT5 | -2.197225 | 0.363727 | -6.041 | <b>&lt;0.001 ***</b> |
| 3RevT6 - 2SanT5 | -4.815663 | 1.036839 | -4.645 | <b>&lt;0.001 ***</b> |
| 3RevT1 - 2SanT6 | -1.851076 | 0.305885 | -6.052 | <b>&lt;0.001 ***</b> |
| 3RevT2 - 2SanT6 | -1.940688 | 0.325311 | -5.966 | <b>&lt;0.001 ***</b> |
| 3RevT3 - 2SanT6 | -1.186916 | 0.289428 | -4.101 | <b>&lt;0.01 **</b>   |
| 3RevT4 - 2SanT6 | -0.814677 | 0.278701 | -2.923 | 0.2233               |
| 3RevT5 - 2SanT6 | -2.346153 | 0.355894 | -6.592 | <b>&lt;0.001 ***</b> |
| 3RevT6 - 2SanT6 | -4.964591 | 1.034117 | -4.801 | <b>&lt;0.001 ***</b> |
| 3RevT2 - 3RevT1 | -0.089612 | 0.365957 | -0.245 | 1.0000               |
| 3RevT3 - 3RevT1 | 0.664160  | 0.334464 | 1.986  | 0.8647               |
| 3RevT4 - 3RevT1 | 1.036399  | 0.325226 | 3.187  | 0.1136               |
| 3RevT5 - 3RevT1 | -0.495077 | 0.393393 | -1.258 | 0.9986               |
| 3RevT6 - 3RevT1 | -3.113515 | 1.047614 | -2.972 | 0.1993               |
| 3RevT3 - 3RevT2 | 0.753772  | 0.352318 | 2.139  | 0.7770               |
| 3RevT4 - 3RevT2 | 1.126011  | 0.343560 | 3.277  | 0.0867               |
| 3RevT5 - 3RevT2 | -0.405465 | 0.408681 | -0.992 | 0.9999               |
| 3RevT6 - 3RevT2 | -3.023903 | 1.053450 | -2.870 | 0.2529               |
| 3RevT4 - 3RevT3 | 0.372239  | 0.309798 | 1.202  | 0.9992               |
| 3RevT5 - 3RevT3 | -1.159237 | 0.380737 | -3.045 | 0.1662               |
| 3RevT6 - 3RevT3 | -3.777675 | 1.042928 | -3.622 | <b>0.0290 *</b>      |
| 3RevT5 - 3RevT4 | -1.531476 | 0.372648 | -4.110 | <b>&lt;0.01 **</b>   |
| 3RevT6 - 3RevT4 | -4.149914 | 1.040002 | -3.990 | <b>&lt;0.01 **</b>   |
| 3RevT6 - 3RevT5 | -2.618438 | 1.063292 | -2.463 | 0.5374               |

**Table S7.** Tukey test comparisons for oak leaves shredder abundance (ShN). Significance codes:  
\*\*\*  $\leq 0.001$ ; \*\*  $\leq 0.01$ ; \*  $\leq 0.05$ .

| Comparison      | Estimate  | Std. Error | Z Value | p-Value              |
|-----------------|-----------|------------|---------|----------------------|
| 1CriT2 - 1CriT1 | -0.417441 | 0.269899   | -1.547  | 0.9852               |
| 1CriT3 - 1CriT1 | 0.302453  | 0.264110   | 1.145   | 0.9996               |
| 1CriT4 - 1CriT1 | 0.046520  | 0.265724   | 0.175   | 1.0000               |
| 1CriT5 - 1CriT1 | 0.062801  | 0.276418   | 0.227   | 1.0000               |
| 1CriT6 - 1CriT1 | 0.143894  | 0.265062   | 0.543   | 1.0000               |
| 2SanT1 - 1CriT1 | -1.134980 | 0.281367   | -4.034  | <b>&lt;0.01</b> **   |
| 2SanT2 - 1CriT1 | -1.324736 | 0.285914   | -4.633  | <b>&lt;0.001</b> *** |
| 2SanT3 - 1CriT1 | -1.504077 | 0.304783   | -4.935  | <b>&lt;0.001</b> *** |
| 2SanT4 - 1CriT1 | -0.216223 | 0.267857   | -0.807  | 1.0000               |
| 2SanT5 - 1CriT1 | -0.559616 | 0.271599   | -2.060  | 0.8239               |
| 2SanT6 - 1CriT1 | -0.410687 | 0.261015   | -1.573  | 0.9823               |
| 3RevT1 - 1CriT1 | -2.261763 | 0.310204   | -7.291  | <b>&lt;0.001</b> *** |
| 3RevT2 - 1CriT1 | -2.351375 | 0.329375   | -7.139  | <b>&lt;0.001</b> *** |
| 3RevT3 - 1CriT1 | -1.597603 | 0.293989   | -5.434  | <b>&lt;0.001</b> *** |
| 3RevT4 - 1CriT1 | -1.225364 | 0.283434   | -4.323  | <b>&lt;0.01</b> **   |
| 3RevT5 - 1CriT1 | -2.756840 | 0.359613   | -7.666  | <b>&lt;0.001</b> *** |
| 3RevT6 - 1CriT1 | -5.375278 | 1.035403   | -5.191  | <b>&lt;0.001</b> *** |
| 1CriT3 - 1CriT2 | 0.719895  | 0.267974   | 2.686   | 0.3685               |
| 1CriT4 - 1CriT2 | 0.463961  | 0.269565   | 1.721   | 0.9577               |
| 1CriT5 - 1CriT2 | 0.480242  | 0.280112   | 1.714   | 0.9594               |
| 1CriT6 - 1CriT2 | 0.561335  | 0.268912   | 2.087   | 0.8090               |
| 2SanT1 - 1CriT2 | -0.717539 | 0.284996   | -2.518  | 0.4924               |
| 2SanT2 - 1CriT2 | -0.907295 | 0.289487   | -3.134  | 0.1310               |
| 2SanT3 - 1CriT2 | -1.086636 | 0.308137   | -3.526  | <b>0.0399</b> *      |
| 2SanT4 - 1CriT2 | 0.201218  | 0.271668   | 0.741   | 1.0000               |
| 2SanT5 - 1CriT2 | -0.142174 | 0.275357   | -0.516  | 1.0000               |
| 2SanT6 - 1CriT2 | 0.006754  | 0.264924   | 0.025   | 1.0000               |
| 3RevT1 - 1CriT2 | -1.844322 | 0.313500   | -5.883  | <b>&lt;0.001</b> *** |
| 3RevT2 - 1CriT2 | -1.933934 | 0.332481   | -5.817  | <b>&lt;0.001</b> *** |
| 3RevT3 - 1CriT2 | -1.180162 | 0.297464   | -3.967  | <b>&lt;0.01</b> **   |
| 3RevT4 - 1CriT2 | -0.807923 | 0.287038   | -2.815  | 0.2837               |
| 3RevT5 - 1CriT2 | -2.339399 | 0.362460   | -6.454  | <b>&lt;0.001</b> *** |
| 3RevT6 - 1CriT2 | -4.957837 | 1.036395   | -4.784  | <b>&lt;0.001</b> *** |
| 1CriT4 - 1CriT3 | -0.255933 | 0.263768   | -0.970  | 1.0000               |
| 1CriT5 - 1CriT3 | -0.239652 | 0.274538   | -0.873  | 1.0000               |
| 1CriT6 - 1CriT3 | -0.158559 | 0.263101   | -0.603  | 1.0000               |
| 2SanT1 - 1CriT3 | -1.437433 | 0.279520   | -5.143  | <b>&lt;0.001</b> *** |
| 2SanT2 - 1CriT3 | -1.627190 | 0.284097   | -5.728  | <b>&lt;0.001</b> *** |
| 2SanT3 - 1CriT3 | -1.806531 | 0.303079   | -5.961  | <b>&lt;0.001</b> *** |
| 2SanT4 - 1CriT3 | -0.518676 | 0.265917   | -1.951  | 0.8812               |
| 2SanT5 - 1CriT3 | -0.862069 | 0.269685   | -3.197  | 0.1110               |
| 2SanT6 - 1CriT3 | -0.713140 | 0.259023   | -2.753  | 0.3244               |
| 3RevT1 - 1CriT3 | -2.564216 | 0.308530   | -8.311  | <b>&lt;0.001</b> *** |
| 3RevT2 - 1CriT3 | -2.653829 | 0.327799   | -8.096  | <b>&lt;0.001</b> *** |
| 3RevT3 - 1CriT3 | -1.900057 | 0.292222   | -6.502  | <b>&lt;0.001</b> *** |
| 3RevT4 - 1CriT3 | -1.527817 | 0.281601   | -5.425  | <b>&lt;0.001</b> *** |
| 3RevT5 - 1CriT3 | -3.059294 | 0.358170   | -8.541  | <b>&lt;0.001</b> *** |
| 3RevT6 - 1CriT3 | -5.677732 | 1.034903   | -5.486  | <b>&lt;0.001</b> *** |
| 1CriT5 - 1CriT4 | 0.016281  | 0.276092   | 0.059   | 1.0000               |
| 1CriT6 - 1CriT4 | 0.097374  | 0.264722   | 0.368   | 1.0000               |
| 2SanT1 - 1CriT4 | -1.181500 | 0.281046   | -4.204  | <b>&lt;0.01</b> **   |
| 2SanT2 - 1CriT4 | -1.371256 | 0.285598   | -4.801  | <b>&lt;0.001</b> *** |



|                 |           |          |        |                      |
|-----------------|-----------|----------|--------|----------------------|
| 2SanT3 - 1CriT4 | -1.550597 | 0.304487 | -5.092 | <b>&lt;0.001 ***</b> |
| 2SanT4 - 1CriT4 | -0.262743 | 0.267520 | -0.982 | 0.9999               |
| 2SanT5 - 1CriT4 | -0.606136 | 0.271266 | -2.234 | 0.7115               |
| 2SanT6 - 1CriT4 | -0.457207 | 0.260669 | -1.754 | 0.9504               |
| 3RevT1 - 1CriT4 | -2.308283 | 0.309913 | -7.448 | <b>&lt;0.001 ***</b> |
| 3RevT2 - 1CriT4 | -2.397895 | 0.329101 | -7.286 | <b>&lt;0.001 ***</b> |
| 3RevT3 - 1CriT4 | -1.644123 | 0.293682 | -5.598 | <b>&lt;0.001 ***</b> |
| 3RevT4 - 1CriT4 | -1.271884 | 0.283116 | -4.492 | <b>&lt;0.001 ***</b> |
| 3RevT5 - 1CriT4 | -2.803360 | 0.359362 | -7.801 | <b>&lt;0.001 ***</b> |
| 3RevT6 - 1CriT4 | -5.421798 | 1.035316 | -5.237 | <b>&lt;0.001 ***</b> |
| 1CriT6 - 1CriT5 | 0.081093  | 0.275455 | 0.294  | 1.0000               |
| 2SanT1 - 1CriT5 | -1.197781 | 0.291178 | -4.114 | <b>&lt;0.01 **</b>   |
| 2SanT2 - 1CriT5 | -1.387537 | 0.295574 | -4.694 | <b>&lt;0.001 ***</b> |
| 2SanT3 - 1CriT5 | -1.566878 | 0.313863 | -4.992 | <b>&lt;0.001 ***</b> |
| 2SanT4 - 1CriT5 | -0.279024 | 0.278145 | -1.003 | 0.9999               |
| 2SanT5 - 1CriT5 | -0.622417 | 0.281750 | -2.209 | 0.7300               |
| 2SanT6 - 1CriT5 | -0.473488 | 0.271562 | -1.744 | 0.9530               |
| 3RevT1 - 1CriT5 | -2.324564 | 0.319130 | -7.284 | <b>&lt;0.001 ***</b> |
| 3RevT2 - 1CriT5 | -2.414176 | 0.337795 | -7.147 | <b>&lt;0.001 ***</b> |
| 3RevT3 - 1CriT5 | -1.660404 | 0.303392 | -5.473 | <b>&lt;0.001 ***</b> |
| 3RevT4 - 1CriT5 | -1.288165 | 0.293176 | -4.394 | <b>&lt;0.01 **</b>   |
| 3RevT5 - 1CriT5 | -2.819641 | 0.367340 | -7.676 | <b>&lt;0.001 ***</b> |
| 3RevT6 - 1CriT5 | -5.438079 | 1.038112 | -5.238 | <b>&lt;0.001 ***</b> |
| 2SanT1 - 1CriT6 | -1.278874 | 0.280420 | -4.561 | <b>&lt;0.001 ***</b> |
| 2SanT2 - 1CriT6 | -1.468631 | 0.284982 | -5.153 | <b>&lt;0.001 ***</b> |
| 2SanT3 - 1CriT6 | -1.647972 | 0.303909 | -5.423 | <b>&lt;0.001 ***</b> |
| 2SanT4 - 1CriT6 | -0.360117 | 0.266863 | -1.349 | 0.9967               |
| 2SanT5 - 1CriT6 | -0.703510 | 0.270618 | -2.600 | 0.4317               |
| 2SanT6 - 1CriT6 | -0.554581 | 0.259994 | -2.133 | 0.7797               |
| 3RevT1 - 1CriT6 | -2.405657 | 0.309345 | -7.777 | <b>&lt;0.001 ***</b> |
| 3RevT2 - 1CriT6 | -2.495269 | 0.328567 | -7.594 | <b>&lt;0.001 ***</b> |
| 3RevT3 - 1CriT6 | -1.741498 | 0.293083 | -5.942 | <b>&lt;0.001 ***</b> |
| 3RevT4 - 1CriT6 | -1.369258 | 0.282494 | -4.847 | <b>&lt;0.001 ***</b> |
| 3RevT5 - 1CriT6 | -2.900735 | 0.358873 | -8.083 | <b>&lt;0.001 ***</b> |
| 3RevT6 - 1CriT6 | -5.519173 | 1.035146 | -5.332 | <b>&lt;0.001 ***</b> |
| 2SanT2 - 2SanT1 | -0.189757 | 0.300207 | -0.632 | 1.0000               |
| 2SanT3 - 2SanT1 | -0.369097 | 0.318229 | -1.160 | 0.9995               |
| 2SanT4 - 2SanT1 | 0.918757  | 0.283064 | 3.246  | 0.0981               |
| 2SanT5 - 2SanT1 | 0.575364  | 0.286607 | 2.008  | 0.8534               |
| 2SanT6 - 2SanT1 | 0.724293  | 0.276597 | 2.619  | 0.4182               |
| 3RevT1 - 2SanT1 | -1.126783 | 0.323425 | -3.484 | <b>0.0467 *</b>      |
| 3RevT2 - 2SanT1 | -1.216395 | 0.341856 | -3.558 | <b>0.0366 *</b>      |
| 3RevT3 - 2SanT1 | -0.462624 | 0.307907 | -1.502 | 0.9892               |
| 3RevT4 - 2SanT1 | -0.090384 | 0.297846 | -0.303 | 1.0000               |
| 3RevT5 - 2SanT1 | -1.621860 | 0.371078 | -4.371 | <b>&lt;0.01 **</b>   |
| 3RevT6 - 2SanT1 | -4.240298 | 1.039441 | -4.079 | <b>&lt;0.01 **</b>   |
| 2SanT3 - 2SanT2 | -0.179341 | 0.322257 | -0.557 | 1.0000               |
| 2SanT4 - 2SanT2 | 1.108513  | 0.287584 | 3.855  | <b>0.0131 *</b>      |
| 2SanT5 - 2SanT2 | 0.765121  | 0.291072 | 2.629  | 0.4110               |
| 2SanT6 - 2SanT2 | 0.914049  | 0.281222 | 3.250  | 0.0963               |
| 3RevT1 - 2SanT2 | -0.937027 | 0.327389 | -2.862 | 0.2558               |
| 3RevT2 - 2SanT2 | -1.026639 | 0.345608 | -2.971 | 0.1977               |
| 3RevT3 - 2SanT2 | -0.272867 | 0.312068 | -0.874 | 1.0000               |
| 3RevT4 - 2SanT2 | 0.099372  | 0.302146 | 0.329  | 1.0000               |
| 3RevT5 - 2SanT2 | -1.432104 | 0.374538 | -3.824 | <b>0.0136 *</b>      |
| 3RevT6 - 2SanT2 | -4.050542 | 1.040681 | -3.892 | <b>0.0111 *</b>      |

|                 |           |          |        |                      |
|-----------------|-----------|----------|--------|----------------------|
| 2SanT4 - 2SanT3 | 1.287854  | 0.306350 | 4.204  | <b>&lt;0.01 **</b>   |
| 2SanT5 - 2SanT3 | 0.944462  | 0.309627 | 3.050  | 0.1640               |
| 2SanT6 - 2SanT3 | 1.093390  | 0.300386 | 3.640  | <b>0.0274 *</b>      |
| 3RevT1 - 2SanT3 | -0.757686 | 0.343990 | -2.203 | 0.7343               |
| 3RevT2 - 2SanT3 | -0.847298 | 0.361374 | -2.345 | 0.6290               |
| 3RevT3 - 2SanT3 | -0.093526 | 0.329442 | -0.284 | 1.0000               |
| 3RevT4 - 2SanT3 | 0.278713  | 0.320059 | 0.871  | 1.0000               |
| 3RevT5 - 2SanT3 | -1.252763 | 0.389133 | -3.219 | 0.1035               |
| 3RevT6 - 2SanT3 | -3.871201 | 1.046022 | -3.701 | <b>0.0224 *</b>      |
| 2SanT5 - 2SanT4 | -0.343393 | 0.273356 | -1.256 | 0.9986               |
| 2SanT6 - 2SanT4 | -0.194464 | 0.262843 | -0.740 | 1.0000               |
| 3RevT1 - 2SanT4 | -2.045540 | 0.311744 | -6.562 | <b>&lt;0.001 ***</b> |
| 3RevT2 - 2SanT4 | -2.135152 | 0.330826 | -6.454 | <b>&lt;0.001 ***</b> |
| 3RevT3 - 2SanT4 | -1.381380 | 0.295613 | -4.673 | <b>&lt;0.001 ***</b> |
| 3RevT4 - 2SanT4 | -1.009141 | 0.285119 | -3.539 | <b>0.0380 *</b>      |
| 3RevT5 - 2SanT4 | -2.540617 | 0.360942 | -7.039 | <b>&lt;0.001 ***</b> |
| 3RevT6 - 2SanT4 | -5.159055 | 1.035865 | -4.980 | <b>&lt;0.001 ***</b> |
| 2SanT6 - 2SanT5 | 0.148929  | 0.266655 | 0.559  | 1.0000               |
| 3RevT1 - 2SanT5 | -1.702147 | 0.314964 | -5.404 | <b>&lt;0.001 ***</b> |
| 3RevT2 - 2SanT5 | -1.791759 | 0.333863 | -5.367 | <b>&lt;0.001 ***</b> |
| 3RevT3 - 2SanT5 | -1.037988 | 0.299007 | -3.471 | <b>0.0490 *</b>      |
| 3RevT4 - 2SanT5 | -0.665748 | 0.288637 | -2.307 | 0.6575               |
| 3RevT5 - 2SanT5 | -2.197225 | 0.363727 | -6.041 | <b>&lt;0.001 ***</b> |
| 3RevT6 - 2SanT5 | -4.815663 | 1.036839 | -4.645 | <b>&lt;0.001 ***</b> |
| 3RevT1 - 2SanT6 | -1.851076 | 0.305885 | -6.052 | <b>&lt;0.001 ***</b> |
| 3RevT2 - 2SanT6 | -1.940688 | 0.325311 | -5.966 | <b>&lt;0.001 ***</b> |
| 3RevT3 - 2SanT6 | -1.186916 | 0.289428 | -4.101 | <b>&lt;0.01 **</b>   |
| 3RevT4 - 2SanT6 | -0.814677 | 0.278701 | -2.923 | 0.2234               |
| 3RevT5 - 2SanT6 | -2.346153 | 0.355894 | -6.592 | <b>&lt;0.001 ***</b> |
| 3RevT6 - 2SanT6 | -4.964591 | 1.034117 | -4.801 | <b>&lt;0.001 ***</b> |
| 3RevT2 - 3RevT1 | -0.089612 | 0.365957 | -0.245 | 1.0000               |
| 3RevT3 - 3RevT1 | 0.664160  | 0.334464 | 1.986  | 0.8646               |
| 3RevT4 - 3RevT1 | 1.036399  | 0.325226 | 3.187  | 0.1137               |
| 3RevT5 - 3RevT1 | -0.495077 | 0.393393 | -1.258 | 0.9986               |
| 3RevT6 - 3RevT1 | -3.113515 | 1.047614 | -2.972 | 0.1998               |
| 3RevT3 - 3RevT2 | 0.753772  | 0.352318 | 2.139  | 0.7764               |
| 3RevT4 - 3RevT2 | 1.126011  | 0.343560 | 3.277  | 0.0867               |
| 3RevT5 - 3RevT2 | -0.405465 | 0.408681 | -0.992 | 0.9999               |
| 3RevT6 - 3RevT2 | -3.023903 | 1.053450 | -2.870 | 0.2506               |
| 3RevT4 - 3RevT3 | 0.372239  | 0.309798 | 1.202  | 0.9992               |
| 3RevT5 - 3RevT3 | -1.159237 | 0.380737 | -3.045 | 0.1659               |
| 3RevT6 - 3RevT3 | -3.777675 | 1.042928 | -3.622 | <b>0.0302 *</b>      |
| 3RevT5 - 3RevT4 | -1.531476 | 0.372648 | -4.110 | <b>&lt;0.01 **</b>   |
| 3RevT6 - 3RevT4 | -4.149914 | 1.040002 | -3.990 | <b>&lt;0.01 **</b>   |
| 3RevT6 - 3RevT5 | -2.618438 | 1.063292 | -2.463 | 0.5373               |

**Table S8.** Tukey test comparisons for chestnut leaves taxa richness (S). Significance codes: \*\*\*  $\leq 0.001$ ; \*\*  $\leq 0.01$ ; \*  $\leq 0.05$ .

| Comparison      | Estimate   | Std. Error | Z Value | p-Value              |
|-----------------|------------|------------|---------|----------------------|
| 1CriT2 - 1CriT1 | 1.917e-01  | 1.604e-01  | 1.195   | 0.9993               |
| 1CriT3 - 1CriT1 | -1.195e-01 | 1.806e-01  | -0.662  | 1.0000               |
| 1CriT4 - 1CriT1 | -5.461e-01 | 1.880e-01  | -2.904  | 0.2373               |
| 1CriT5 - 1CriT1 | -7.412e-01 | 2.204e-01  | -3.364  | 0.0701               |
| 1CriT6 - 1CriT1 | -9.305e-01 | 2.531e-01  | -3.676  | <b>0.0246 *</b>      |
| 2SanT1 - 1CriT1 | -1.355e-01 | 1.738e-01  | -0.780  | 1.0000               |
| 2SanT2 - 1CriT1 | 2.673e-13  | 1.678e-01  | 0.000   | 1.0000               |
| 2SanT3 - 1CriT1 | -2.553e-01 | 1.796e-01  | -1.422  | 0.9943               |
| 2SanT4 - 1CriT1 | -1.355e-01 | 1.738e-01  | -0.780  | 1.0000               |
| 2SanT5 - 1CriT1 | -2.857e-02 | 1.690e-01  | -0.169  | 1.0000               |
| 2SanT6 - 1CriT1 | -1.012e-01 | 1.796e-01  | -0.563  | 1.0000               |
| 3RevT1 - 1CriT1 | -2.584e-01 | 1.880e-01  | -1.374  | 0.9962               |
| 3RevT2 - 1CriT1 | 1.681e-01  | 1.612e-01  | 1.043   | 0.9999               |
| 3RevT3 - 1CriT1 | -1.621e-01 | 1.690e-01  | -0.959  | 1.0000               |
| 3RevT4 - 1CriT1 | -5.015e-01 | 1.932e-01  | -2.595  | 0.4431               |
| 3RevT5 - 1CriT1 | -1.172e+00 | 2.440e-01  | -4.802  | <b>&lt;0.001 ***</b> |
| 3RevT6 - 1CriT1 | -1.085e+00 | 2.361e-01  | -4.594  | <b>&lt;0.001 ***</b> |
| 1CriT3 - 1CriT2 | -3.112e-01 | 1.736e-01  | -1.792  | 0.9418               |
| 1CriT4 - 1CriT2 | -7.377e-01 | 1.814e-01  | -4.067  | <b>&lt;0.01 **</b>   |
| 1CriT5 - 1CriT2 | -9.329e-01 | 2.147e-01  | -4.345  | <b>&lt;0.01 **</b>   |
| 1CriT6 - 1CriT2 | -1.122e+00 | 2.482e-01  | -4.520  | <b>&lt;0.001 ***</b> |
| 2SanT1 - 1CriT2 | -3.272e-01 | 1.666e-01  | -1.964  | 0.8792               |
| 2SanT2 - 1CriT2 | -1.917e-01 | 1.604e-01  | -1.195  | 0.9993               |
| 2SanT3 - 1CriT2 | -4.470e-01 | 1.727e-01  | -2.589  | 0.4474               |
| 2SanT4 - 1CriT2 | -3.272e-01 | 1.666e-01  | -1.964  | 0.8788               |
| 2SanT5 - 1CriT2 | -2.202e-01 | 1.616e-01  | -1.363  | 0.9965               |
| 2SanT6 - 1CriT2 | -2.929e-01 | 1.727e-01  | -1.696  | 0.9648               |
| 3RevT1 - 1CriT2 | -4.500e-01 | 1.814e-01  | -2.481  | 0.5290               |
| 3RevT2 - 1CriT2 | -2.353e-02 | 1.534e-01  | -0.153  | 1.0000               |
| 3RevT3 - 1CriT2 | -3.538e-01 | 1.616e-01  | -2.189  | 0.7489               |
| 3RevT4 - 1CriT2 | -6.931e-01 | 1.868e-01  | -3.711  | <b>0.0221 *</b>      |
| 3RevT5 - 1CriT2 | -1.363e+00 | 2.389e-01  | -5.706  | <b>&lt;0.001 ***</b> |
| 3RevT6 - 1CriT2 | -1.276e+00 | 2.309e-01  | -5.529  | <b>&lt;0.001 ***</b> |
| 1CriT4 - 1CriT3 | -4.265e-01 | 1.995e-01  | -2.138  | 0.7830               |
| 1CriT5 - 1CriT3 | -6.217e-01 | 2.302e-01  | -2.700  | 0.3654               |
| 1CriT6 - 1CriT3 | -8.109e-01 | 2.618e-01  | -3.098  | 0.1465               |
| 2SanT1 - 1CriT3 | -1.600e-02 | 1.861e-01  | -0.086  | 1.0000               |
| 2SanT2 - 1CriT3 | 1.195e-01  | 1.806e-01  | 0.662   | 1.0000               |
| 2SanT3 - 1CriT3 | -1.358e-01 | 1.916e-01  | -0.709  | 1.0000               |
| 2SanT4 - 1CriT3 | -1.600e-02 | 1.861e-01  | -0.086  | 1.0000               |
| 2SanT5 - 1CriT3 | 9.097e-02  | 1.817e-01  | 0.501   | 1.0000               |
| 2SanT6 - 1CriT3 | 1.835e-02  | 1.916e-01  | 0.096   | 1.0000               |
| 3RevT1 - 1CriT3 | -1.388e-01 | 1.995e-01  | -0.696  | 1.0000               |
| 3RevT2 - 1CriT3 | 2.877e-01  | 1.744e-01  | 1.649   | 0.9729               |
| 3RevT3 - 1CriT3 | -4.256e-02 | 1.817e-01  | -0.234  | 1.0000               |
| 3RevT4 - 1CriT3 | -3.819e-01 | 2.044e-01  | -1.869  | 0.9181               |
| 3RevT5 - 1CriT3 | -1.052e+00 | 2.529e-01  | -4.160  | <b>&lt;0.01 **</b>   |
| 3RevT6 - 1CriT3 | -9.651e-01 | 2.453e-01  | -3.934  | <b>0.0102 *</b>      |
| 1CriT5 - 1CriT4 | -1.952e-01 | 2.361e-01  | -0.827  | 1.0000               |
| 1CriT6 - 1CriT4 | -3.844e-01 | 2.670e-01  | -1.440  | 0.9936               |
| 2SanT1 - 1CriT4 | 4.105e-01  | 1.934e-01  | 2.123   | 0.7931               |
| 2SanT2 - 1CriT4 | 5.461e-01  | 1.880e-01  | 2.904   | 0.2408               |

|                 |            |           |        |                      |
|-----------------|------------|-----------|--------|----------------------|
| 2SanT3 - 1CriT4 | 2.907e-01  | 1.986e-01 | 1.464  | 0.9922               |
| 2SanT4 - 1CriT4 | 4.105e-01  | 1.934e-01 | 2.123  | 0.7926               |
| 2SanT5 - 1CriT4 | 5.175e-01  | 1.891e-01 | 2.736  | 0.3409               |
| 2SanT6 - 1CriT4 | 4.449e-01  | 1.986e-01 | 2.240  | 0.7141               |
| 3RevT1 - 1CriT4 | 2.877e-01  | 2.063e-01 | 1.395  | 0.9954               |
| 3RevT2 - 1CriT4 | 7.142e-01  | 1.822e-01 | 3.921  | <b>0.0108 *</b>      |
| 3RevT3 - 1CriT4 | 3.840e-01  | 1.891e-01 | 2.030  | 0.8455               |
| 3RevT4 - 1CriT4 | 4.458e-02  | 2.110e-01 | 0.211  | 1.0000               |
| 3RevT5 - 1CriT4 | -6.256e-01 | 2.583e-01 | -2.422 | 0.5764               |
| 3RevT6 - 1CriT4 | -5.386e-01 | 2.509e-01 | -2.147 | 0.7784               |
| 1CriT6 - 1CriT5 | -1.892e-01 | 2.907e-01 | -0.651 | 1.0000               |
| 2SanT1 - 1CriT5 | 6.057e-01  | 2.250e-01 | 2.692  | 0.3705               |
| 2SanT2 - 1CriT5 | 7.412e-01  | 2.204e-01 | 3.364  | 0.0691               |
| 2SanT3 - 1CriT5 | 4.859e-01  | 2.295e-01 | 2.117  | 0.7963               |
| 2SanT4 - 1CriT5 | 6.057e-01  | 2.250e-01 | 2.692  | 0.3713               |
| 2SanT5 - 1CriT5 | 7.127e-01  | 2.213e-01 | 3.220  | 0.1058               |
| 2SanT6 - 1CriT5 | 6.400e-01  | 2.295e-01 | 2.789  | 0.3075               |
| 3RevT1 - 1CriT5 | 4.829e-01  | 2.361e-01 | 2.045  | 0.8384               |
| 3RevT2 - 1CriT5 | 9.094e-01  | 2.154e-01 | 4.222  | <b>&lt;0.01 **</b>   |
| 3RevT3 - 1CriT5 | 5.791e-01  | 2.213e-01 | 2.617  | 0.4257               |
| 3RevT4 - 1CriT5 | 2.398e-01  | 2.403e-01 | 0.998  | 0.9999               |
| 3RevT5 - 1CriT5 | -4.304e-01 | 2.827e-01 | -1.522 | 0.9881               |
| 3RevT6 - 1CriT5 | -3.434e-01 | 2.759e-01 | -1.244 | 0.9989               |
| 2SanT1 - 1CriT6 | 7.949e-01  | 2.572e-01 | 3.091  | 0.1506               |
| 2SanT2 - 1CriT6 | 9.305e-01  | 2.531e-01 | 3.676  | <b>0.0250 *</b>      |
| 2SanT3 - 1CriT6 | 6.751e-01  | 2.611e-01 | 2.586  | 0.4480               |
| 2SanT4 - 1CriT6 | 7.949e-01  | 2.572e-01 | 3.091  | 0.1507               |
| 2SanT5 - 1CriT6 | 9.019e-01  | 2.540e-01 | 3.551  | <b>0.0374 *</b>      |
| 2SanT6 - 1CriT6 | 8.293e-01  | 2.611e-01 | 3.176  | 0.1209               |
| 3RevT1 - 1CriT6 | 6.721e-01  | 2.670e-01 | 2.517  | 0.5019               |
| 3RevT2 - 1CriT6 | 1.099e+00  | 2.488e-01 | 4.416  | <b>&lt;0.01 **</b>   |
| 3RevT3 - 1CriT6 | 7.684e-01  | 2.540e-01 | 3.026  | 0.1787               |
| 3RevT4 - 1CriT6 | 4.290e-01  | 2.707e-01 | 1.585  | 0.9819               |
| 3RevT5 - 1CriT6 | -2.412e-01 | 3.090e-01 | -0.781 | 1.0000               |
| 3RevT6 - 1CriT6 | -1.542e-01 | 3.028e-01 | -0.509 | 1.0000               |
| 2SanT2 - 2SanT1 | 1.355e-01  | 1.738e-01 | 0.780  | 1.0000               |
| 2SanT3 - 2SanT1 | -1.198e-01 | 1.852e-01 | -0.647 | 1.0000               |
| 2SanT4 - 2SanT1 | 9.948e-14  | 1.796e-01 | 0.000  | 1.0000               |
| 2SanT5 - 2SanT1 | 1.070e-01  | 1.750e-01 | 0.611  | 1.0000               |
| 2SanT6 - 2SanT1 | 3.435e-02  | 1.852e-01 | 0.185  | 1.0000               |
| 3RevT1 - 2SanT1 | -1.228e-01 | 1.934e-01 | -0.635 | 1.0000               |
| 3RevT2 - 2SanT1 | 3.037e-01  | 1.674e-01 | 1.814  | 0.9354               |
| 3RevT3 - 2SanT1 | -2.656e-02 | 1.750e-01 | -0.152 | 1.0000               |
| 3RevT4 - 2SanT1 | -3.659e-01 | 1.985e-01 | -1.844 | 0.9271               |
| 3RevT5 - 2SanT1 | -1.036e+00 | 2.482e-01 | -4.175 | <b>&lt;0.01 **</b>   |
| 3RevT6 - 2SanT1 | -9.491e-01 | 2.404e-01 | -3.948 | <b>&lt;0.01 **</b>   |
| 2SanT3 - 2SanT2 | -2.553e-01 | 1.796e-01 | -1.422 | 0.9944               |
| 2SanT4 - 2SanT2 | -1.355e-01 | 1.738e-01 | -0.780 | 1.0000               |
| 2SanT5 - 2SanT2 | -2.857e-02 | 1.690e-01 | -0.169 | 1.0000               |
| 2SanT6 - 2SanT2 | -1.012e-01 | 1.796e-01 | -0.563 | 1.0000               |
| 3RevT1 - 2SanT2 | -2.584e-01 | 1.880e-01 | -1.374 | 0.9963               |
| 3RevT2 - 2SanT2 | 1.681e-01  | 1.612e-01 | 1.043  | 0.9999               |
| 3RevT3 - 2SanT2 | -1.621e-01 | 1.690e-01 | -0.959 | 1.0000               |
| 3RevT4 - 2SanT2 | -5.015e-01 | 1.932e-01 | -2.595 | 0.4426               |
| 3RevT5 - 2SanT2 | -1.172e+00 | 2.440e-01 | -4.802 | <b>&lt;0.001 ***</b> |
| 3RevT6 - 2SanT2 | -1.085e+00 | 2.361e-01 | -4.594 | <b>&lt;0.001 ***</b> |

|                 |            |           |        |                      |
|-----------------|------------|-----------|--------|----------------------|
| 2SanT4 - 2SanT3 | 1.198e-01  | 1.852e-01 | 0.647  | 1.0000               |
| 2SanT5 - 2SanT3 | 2.268e-01  | 1.808e-01 | 1.255  | 0.9987               |
| 2SanT6 - 2SanT3 | 1.542e-01  | 1.907e-01 | 0.808  | 1.0000               |
| 3RevT1 - 2SanT3 | -3.035e-03 | 1.986e-01 | -0.015 | 1.0000               |
| 3RevT2 - 2SanT3 | 4.235e-01  | 1.735e-01 | 2.441  | 0.5610               |
| 3RevT3 - 2SanT3 | 9.324e-02  | 1.808e-01 | 0.516  | 1.0000               |
| 3RevT4 - 2SanT3 | -2.461e-01 | 2.036e-01 | -1.209 | 0.9992               |
| 3RevT5 - 2SanT3 | -9.163e-01 | 2.523e-01 | -3.632 | <b>0.0293 *</b>      |
| 3RevT6 - 2SanT3 | -8.293e-01 | 2.446e-01 | -3.390 | 0.0648               |
| 2SanT5 - 2SanT4 | 1.070e-01  | 1.750e-01 | 0.611  | 1.0000               |
| 2SanT6 - 2SanT4 | 3.435e-02  | 1.852e-01 | 0.185  | 1.0000               |
| 3RevT1 - 2SanT4 | -1.228e-01 | 1.934e-01 | -0.635 | 1.0000               |
| 3RevT2 - 2SanT4 | 3.037e-01  | 1.674e-01 | 1.814  | 0.9361               |
| 3RevT3 - 2SanT4 | -2.656e-02 | 1.750e-01 | -0.152 | 1.0000               |
| 3RevT4 - 2SanT4 | -3.659e-01 | 1.985e-01 | -1.844 | 0.9271               |
| 3RevT5 - 2SanT4 | -1.036e+00 | 2.482e-01 | -4.175 | <b>&lt;0.01 **</b>   |
| 3RevT6 - 2SanT4 | -9.491e-01 | 2.404e-01 | -3.948 | <b>&lt;0.01 **</b>   |
| 2SanT6 - 2SanT5 | -7.262e-02 | 1.808e-01 | -0.402 | 1.0000               |
| 3RevT1 - 2SanT5 | -2.298e-01 | 1.891e-01 | -1.215 | 0.9992               |
| 3RevT2 - 2SanT5 | 1.967e-01  | 1.625e-01 | 1.211  | 0.9992               |
| 3RevT3 - 2SanT5 | -1.335e-01 | 1.703e-01 | -0.784 | 1.0000               |
| 3RevT4 - 2SanT5 | -4.729e-01 | 1.943e-01 | -2.434 | 0.5662               |
| 3RevT5 - 2SanT5 | -1.143e+00 | 2.448e-01 | -4.669 | <b>&lt;0.001 ***</b> |
| 3RevT6 - 2SanT5 | -1.056e+00 | 2.370e-01 | -4.456 | <b>&lt;0.01 **</b>   |
| 3RevT1 - 2SanT6 | -1.572e-01 | 1.986e-01 | -0.791 | 1.0000               |
| 3RevT2 - 2SanT6 | 2.693e-01  | 1.735e-01 | 1.553  | 0.9853               |
| 3RevT3 - 2SanT6 | -6.091e-02 | 1.808e-01 | -0.337 | 1.0000               |
| 3RevT4 - 2SanT6 | -4.003e-01 | 2.036e-01 | -1.966 | 0.8776               |
| 3RevT5 - 2SanT6 | -1.070e+00 | 2.523e-01 | -4.243 | <b>&lt;0.01 **</b>   |
| 3RevT6 - 2SanT6 | -9.834e-01 | 2.446e-01 | -4.020 | <b>&lt;0.01 **</b>   |
| 3RevT2 - 3RevT1 | 4.265e-01  | 1.822e-01 | 2.341  | 0.6388               |
| 3RevT3 - 3RevT1 | 9.628e-02  | 1.891e-01 | 0.509  | 1.0000               |
| 3RevT4 - 3RevT1 | -2.431e-01 | 2.110e-01 | -1.152 | 0.9996               |
| 3RevT5 - 3RevT1 | -9.133e-01 | 2.583e-01 | -3.535 | <b>0.0398 *</b>      |
| 3RevT6 - 3RevT1 | -8.262e-01 | 2.509e-01 | 3.293  | 0.0837               |
| 3RevT3 - 3RevT2 | -3.302e-01 | 1.625e-01 | -2.033 | 0.8441               |
| 3RevT4 - 3RevT2 | -6.696e-01 | 1.875e-01 | -3.571 | <b>0.0357 *</b>      |
| 3RevT5 - 3RevT2 | -1.340e+00 | 2.395e-01 | -5.594 | <b>&lt;0.001 ***</b> |
| 3RevT6 - 3RevT2 | -1.253e+00 | 2.315e-01 | -5.413 | <b>&lt;0.001 ***</b> |
| 3RevT4 - 3RevT3 | -3.394e-01 | 1.943e-01 | -1.747 | 0.9539               |
| 3RevT5 - 3RevT3 | -1.010e+00 | 2.448e-01 | -4.123 | <b>&lt;0.01 **</b>   |
| 3RevT6 - 3RevT3 | -9.225e-01 | 2.370e-01 | -3.893 | <b>0.0109 *</b>      |
| 3RevT5 - 3RevT4 | -6.702e-01 | 2.621e-01 | -2.557 | 0.4727               |
| 3RevT6 - 3RevT4 | -5.831e-01 | 2.548e-01 | -2.289 | 0.6780               |
| 3RevT6 - 3RevT5 | 8.701e-02  | 2.952e-01 | 0.295  | 1.0000               |

**Table S9.** Tukey test comparisons for chestnut leaves total abundance (N). Significance codes: \*\*\*  $\leq 0.001$ ; \*\*  $\leq 0.01$ ; \*  $\leq 0.05$ .

| Comparison      | Estimate | Std. Error | Z Value | p-Value    |
|-----------------|----------|------------|---------|------------|
| 1CriT2 - 1CriT1 | 0.98131  | 0.38042    | 2.580   | 0.4680     |
| 1CriT3 - 1CriT1 | 1.17100  | 0.39533    | 2.962   | 0.2160     |
| 1CriT4 - 1CriT1 | 1.01283  | 0.36849    | 2.749   | 0.3434     |
| 1CriT5 - 1CriT1 | 1.27441  | 0.39516    | 3.225   | 0.1087     |
| 1CriT6 - 1CriT1 | 1.22536  | 0.41562    | 2.948   | 0.2250     |
| 2SanT1 - 1CriT1 | -0.76104 | 0.38928    | -1.955  | 0.8887     |
| 2SanT2 - 1CriT1 | 0.84177  | 0.38071    | 2.211   | 0.7459     |
| 2SanT3 - 1CriT1 | 0.72544  | 0.38098    | 1.904   | 0.9098     |
| 2SanT4 - 1CriT1 | 0.85499  | 0.38068    | 2.246   | 0.7208     |
| 2SanT5 - 1CriT1 | 0.58521  | 0.38134    | 1.535   | 0.9880     |
| 2SanT6 - 1CriT1 | 1.19991  | 0.39528    | 3.036   | 0.1823     |
| 3RevT1 - 1CriT1 | -0.31508 | 0.40133    | -0.785  | 1.0000     |
| 3RevT2 - 1CriT1 | 0.36743  | 0.38203    | 0.962   | 1.0000     |
| 3RevT3 - 1CriT1 | -0.79252 | 0.37686    | -2.103  | 0.8139     |
| 3RevT4 - 1CriT1 | 0.44459  | 0.38177    | 1.165   | 0.9996     |
| 3RevT5 - 1CriT1 | -2.46579 | 0.43443    | -5.676  | <0.001 *** |
| 3RevT6 - 1CriT1 | -2.33795 | 0.42810    | -5.461  | <0.001 *** |
| 1CriT3 - 1CriT2 | 0.18969  | 0.39227    | 0.484   | 1.0000     |
| 1CriT4 - 1CriT2 | 0.03152  | 0.36520    | 0.086   | 1.0000     |
| 1CriT5 - 1CriT2 | 0.29309  | 0.39209    | 0.748   | 1.0000     |
| 1CriT6 - 1CriT2 | 0.24405  | 0.41271    | 0.591   | 1.0000     |
| 2SanT1 - 1CriT2 | -1.74235 | 0.38617    | -4.512  | <0.001 *** |
| 2SanT2 - 1CriT2 | -0.13954 | 0.37752    | -0.370  | 1.0000     |
| 2SanT3 - 1CriT2 | -0.25587 | 0.37779    | -0.677  | 1.0000     |
| 2SanT4 - 1CriT2 | -0.12632 | 0.37749    | -0.335  | 1.0000     |
| 2SanT5 - 1CriT2 | -0.39610 | 0.37817    | -1.047  | 0.9999     |
| 2SanT6 - 1CriT2 | 0.21860  | 0.39222    | 0.557   | 1.0000     |
| 3RevT1 - 1CriT2 | -1.29639 | 0.39831    | -3.255  | 0.0999     |
| 3RevT2 - 1CriT2 | -0.61388 | 0.37886    | -1.620  | 0.9789     |
| 3RevT3 - 1CriT2 | -1.77383 | 0.37364    | -4.747  | <0.001 *** |
| 3RevT4 - 1CriT2 | -0.53672 | 0.37860    | -1.418  | 0.9950     |
| 3RevT5 - 1CriT2 | -3.44710 | 0.43164    | -7.986  | <0.001 *** |
| 3RevT6 - 1CriT2 | -3.31926 | 0.42528    | -7.805  | <0.001 *** |
| 1CriT4 - 1CriT3 | -0.15817 | 0.38071    | -0.415  | 1.0000     |
| 1CriT5 - 1CriT3 | 0.10340  | 0.40658    | 0.254   | 1.0000     |
| 1CriT6 - 1CriT3 | 0.05436  | 0.42649    | 0.127   | 1.0000     |
| 2SanT1 - 1CriT3 | -1.93204 | 0.40086    | -4.820  | <0.001 *** |
| 2SanT2 - 1CriT3 | -0.32924 | 0.39254    | -0.839  | 1.0000     |
| 2SanT3 - 1CriT3 | -0.44556 | 0.39280    | -1.134  | 0.9997     |
| 2SanT4 - 1CriT3 | -0.31601 | 0.39252    | -0.805  | 1.0000     |
| 2SanT5 - 1CriT3 | -0.58579 | 0.39316    | -1.490  | 0.9913     |
| 2SanT6 - 1CriT3 | 0.02891  | 0.40670    | 0.071   | 1.0000     |
| 3RevT1 - 1CriT3 | -1.48608 | 0.41257    | -3.602  | 0.0334 *   |
| 3RevT2 - 1CriT3 | -0.80358 | 0.39383    | -2.040  | 0.8482     |
| 3RevT3 - 1CriT3 | -1.96352 | 0.38881    | -5.050  | <0.001 *** |
| 3RevT4 - 1CriT3 | -0.72642 | 0.39358    | -1.846  | 0.9303     |
| 3RevT5 - 1CriT3 | -3.63679 | 0.44484    | -8.176  | <0.001 *** |
| 3RevT6 - 1CriT3 | -3.50896 | 0.43866    | -7.999  | <0.001 *** |
| 1CriT5 - 1CriT4 | 0.26158  | 0.38053    | 0.687   | 1.0000     |
| 1CriT6 - 1CriT4 | 0.21254  | 0.40174    | 0.529   | 1.0000     |
| 2SanT1 - 1CriT4 | -1.77387 | 0.37442    | -4.738  | <0.001 *** |
| 2SanT2 - 1CriT4 | -0.17106 | 0.36550    | -0.468  | 1.0000     |

|                 |          |         |        |                      |
|-----------------|----------|---------|--------|----------------------|
| 2SanT3 - 1CriT4 | -0.28739 | 0.36578 | -0.786 | 1.0000               |
| 2SanT4 - 1CriT4 | -0.15784 | 0.36547 | -0.432 | 1.0000               |
| 2SanT5 - 1CriT4 | -0.42762 | 0.36616 | -1.168 | 0.9995               |
| 2SanT6 - 1CriT4 | 0.18708  | 0.38066 | 0.491  | 1.0000               |
| 3RevT1 - 1CriT4 | -1.32791 | 0.38693 | -3.432 | 0.0594               |
| 3RevT2 - 1CriT4 | -0.64540 | 0.36688 | -1.759 | 0.9539               |
| 3RevT3 - 1CriT4 | -1.80535 | 0.36149 | -4.994 | <b>&lt;0.001 ***</b> |
| 3RevT4 - 1CriT4 | -0.56824 | 0.36661 | -1.550 | 0.9869               |
| 3RevT5 - 1CriT4 | -3.47861 | 0.42117 | -8.259 | <b>&lt;0.001 ***</b> |
| 3RevT6 - 1CriT4 | -3.35078 | 0.41464 | -8.081 | <b>&lt;0.001 ***</b> |
| 1CriT6 - 1CriT5 | -0.04904 | 0.42633 | -0.115 | 1.0000               |
| 2SanT1 - 1CriT5 | -2.03544 | 0.40069 | -5.080 | <b>&lt;0.001 ***</b> |
| 2SanT2 - 1CriT5 | -0.43264 | 0.39237 | -1.103 | 0.9998               |
| 2SanT3 - 1CriT5 | -0.54897 | 0.39263 | -1.398 | 0.9958               |
| 2SanT4 - 1CriT5 | -0.41942 | 0.39234 | -1.069 | 0.9999               |
| 2SanT5 - 1CriT5 | -0.68920 | 0.39299 | -1.754 | 0.9550               |
| 2SanT6 - 1CriT5 | -0.07450 | 0.40653 | -0.183 | 1.0000               |
| 3RevT1 - 1CriT5 | -1.58949 | 0.41241 | -3.854 | <b>0.0146 *</b>      |
| 3RevT2 - 1CriT5 | -0.90698 | 0.39365 | -2.304 | 0.6783               |
| 3RevT3 - 1CriT5 | -2.06693 | 0.38864 | -5.318 | <b>&lt;0.001 ***</b> |
| 3RevT4 - 1CriT5 | -0.82982 | 0.39340 | -2.109 | 0.8100               |
| 3RevT5 - 1CriT5 | -3.74019 | 0.44468 | -8.411 | <b>&lt;0.001 ***</b> |
| 3RevT6 - 1CriT5 | -3.61236 | 0.43851 | -8.238 | <b>&lt;0.001 ***</b> |
| 2SanT1 - 1CriT6 | -1.98640 | 0.42089 | -4.720 | <b>&lt;0.001 ***</b> |
| 2SanT2 - 1CriT6 | -0.38360 | 0.41297 | -0.929 | 1.0000               |
| 2SanT3 - 1CriT6 | -0.49993 | 0.41322 | -1.210 | 0.9993               |
| 2SanT4 - 1CriT6 | -0.37037 | 0.41295 | -0.897 | 1.0000               |
| 2SanT5 - 1CriT6 | -0.64015 | 0.41356 | -1.548 | 0.9870               |
| 2SanT6 - 1CriT6 | -0.02545 | 0.42645 | -0.060 | 1.0000               |
| 3RevT1 - 1CriT6 | -1.54045 | 0.43206 | -3.565 | <b>0.0381 *</b>      |
| 3RevT2 - 1CriT6 | -0.85794 | 0.41419 | -2.071 | 0.8311               |
| 3RevT3 - 1CriT6 | -2.01788 | 0.40943 | -4.929 | <b>&lt;0.001 ***</b> |
| 3RevT4 - 1CriT6 | -0.78078 | 0.41395 | -1.886 | 0.9178               |
| 3RevT5 - 1CriT6 | -3.69115 | 0.46296 | -7.973 | <b>&lt;0.001 ***</b> |
| 3RevT6 - 1CriT6 | -3.56332 | 0.45704 | -7.797 | <b>&lt;0.001 ***</b> |
| 2SanT2 - 2SanT1 | 1.60280  | 0.38645 | 4.148  | <b>&lt;0.01 **</b>   |
| 2SanT3 - 2SanT1 | 1.48648  | 0.38671 | 3.844  | <b>0.0148 *</b>      |
| 2SanT4 - 2SanT1 | 1.61603  | 0.38642 | 4.182  | <b>&lt;0.01 **</b>   |
| 2SanT5 - 2SanT1 | 1.34625  | 0.38708 | 3.478  | 0.0510               |
| 2SanT6 - 2SanT1 | 1.96095  | 0.40081 | 4.892  | <b>&lt;0.001 ***</b> |
| 3RevT1 - 2SanT1 | 0.44596  | 0.40678 | 1.096  | 0.9998               |
| 3RevT2 - 2SanT1 | 1.12847  | 0.38775 | 2.910  | 0.2456               |
| 3RevT3 - 2SanT1 | -0.03148 | 0.38266 | -0.082 | 1.0000               |
| 3RevT4 - 2SanT1 | 1.20562  | 0.38749 | 3.111  | 0.1505               |
| 3RevT5 - 2SanT1 | -1.70475 | 0.43947 | -3.879 | <b>0.0131 *</b>      |
| 3RevT6 - 2SanT1 | -1.57691 | 0.43322 | -3.640 | <b>0.0296 *</b>      |
| 2SanT3 - 2SanT2 | -0.11633 | 0.37808 | -0.308 | 1.0000               |
| 2SanT4 - 2SanT2 | 0.01322  | 0.37778 | 0.035  | 1.0000               |
| 2SanT5 - 2SanT2 | -0.25656 | 0.37845 | -0.678 | 1.0000               |
| 2SanT6 - 2SanT2 | 0.35814  | 0.39249 | 0.912  | 1.0000               |
| 3RevT1 - 2SanT2 | -1.15685 | 0.39858 | -2.902 | 0.2486               |
| 3RevT2 - 2SanT2 | -0.47434 | 0.37914 | -1.251 | 0.9989               |
| 3RevT3 - 2SanT2 | -1.63429 | 0.37393 | -4.371 | <b>&lt;0.01 **</b>   |
| 3RevT4 - 2SanT2 | -0.39718 | 0.37888 | -1.048 | 0.9999               |
| 3RevT5 - 2SanT2 | -3.30755 | 0.43189 | -7.658 | <b>&lt;0.001 ***</b> |
| 3RevT6 - 2SanT2 | -3.17972 | 0.42553 | -7.472 | <b>&lt;0.001 ***</b> |

|                 |          |         |        |                      |
|-----------------|----------|---------|--------|----------------------|
| 2SanT4 - 2SanT3 | 0.12955  | 0.37805 | 0.343  | 1.0000               |
| 2SanT5 - 2SanT3 | -0.14023 | 0.37872 | -0.370 | 1.0000               |
| 2SanT6 - 2SanT3 | 0.47447  | 0.39275 | 1.208  | 0.9993               |
| 3RevT1 - 2SanT3 | -1.04052 | 0.39884 | -2.609 | 0.4449               |
| 3RevT2 - 2SanT3 | -0.35801 | 0.37941 | -0.944 | 1.0000               |
| 3RevT3 - 2SanT3 | -1.51796 | 0.37421 | -4.056 | <b>&lt;0.01</b> **   |
| 3RevT4 - 2SanT3 | -0.28085 | 0.37915 | -0.741 | 1.0000               |
| 3RevT5 - 2SanT3 | -3.19122 | 0.43213 | -7.385 | <b>&lt;0.001</b> *** |
| 3RevT6 - 2SanT3 | -3.06339 | 0.42577 | -7.195 | <b>&lt;0.001</b> *** |
| 2SanT5 - 2SanT4 | -0.26978 | 0.37842 | -0.713 | 1.0000               |
| 2SanT6 - 2SanT4 | 0.34492  | 0.39246 | 0.879  | 1.0000               |
| 3RevT1 - 2SanT4 | -1.17007 | 0.39855 | -2.936 | 0.2305               |
| 3RevT2 - 2SanT4 | -0.48756 | 0.37911 | -1.286 | 0.9984               |
| 3RevT3 - 2SanT4 | -1.64751 | 0.37390 | -4.406 | <b>&lt;0.01</b> **   |
| 3RevT4 - 2SanT4 | -0.41040 | 0.37885 | -1.083 | 0.9998               |
| 3RevT5 - 2SanT4 | -3.32078 | 0.43187 | -7.689 | <b>&lt;0.001</b> *** |
| 3RevT6 - 2SanT4 | -3.19294 | 0.42550 | -7.504 | <b>&lt;0.001</b> *** |
| 2SanT6 - 2SanT5 | 0.61470  | 0.39311 | 1.564  | 0.9852               |
| 3RevT1 - 2SanT5 | -0.90029 | 0.39919 | -2.255 | 0.7143               |
| 3RevT2 - 2SanT5 | -0.21778 | 0.37978 | -0.573 | 1.0000               |
| 3RevT3 - 2SanT5 | -1.37773 | 0.37458 | -3.678 | <b>0.0276</b> *      |
| 3RevT4 - 2SanT5 | -0.14062 | 0.37952 | -0.371 | 1.0000               |
| 3RevT5 - 2SanT5 | -3.05099 | 0.43245 | -7.055 | <b>&lt;0.001</b> *** |
| 3RevT6 - 2SanT5 | -2.92316 | 0.42610 | -6.860 | <b>&lt;0.001</b> *** |
| 3RevT1 - 2SanT6 | -1.51499 | 0.41253 | -3.672 | <b>0.0270</b> *      |
| 3RevT2 - 2SanT6 | -0.83248 | 0.39378 | -2.114 | 0.8062               |
| 3RevT3 - 2SanT6 | -1.99243 | 0.38876 | -5.125 | <b>&lt;0.001</b> *** |
| 3RevT4 - 2SanT6 | -0.75532 | 0.39353 | -1.919 | 0.9036               |
| 3RevT5 - 2SanT6 | -3.66570 | 0.44479 | -8.241 | <b>&lt;0.001</b> *** |
| 3RevT6 - 2SanT6 | -3.53786 | 0.43862 | -8.066 | <b>&lt;0.001</b> *** |
| 3RevT2 - 3RevT1 | 0.68251  | 0.39985 | 1.707  | 0.9654               |
| 3RevT3 - 3RevT1 | -0.47744 | 0.39491 | -1.209 | 0.9993               |
| 3RevT4 - 3RevT1 | 0.75967  | 0.39960 | 1.901  | 0.9113               |
| 3RevT5 - 3RevT1 | -2.15070 | 0.45017 | -4.777 | <b>&lt;0.001</b> *** |
| 3RevT6 - 3RevT1 | -2.02287 | 0.44408 | -4.555 | <b>&lt;0.001</b> *** |
| 3RevT3 - 3RevT2 | -1.15995 | 0.37528 | -3.091 | 0.1570               |
| 3RevT4 - 3RevT2 | 0.07716  | 0.38021 | 0.203  | 1.0000               |
| 3RevT5 - 3RevT2 | -2.83321 | 0.43306 | -6.542 | <b>&lt;0.001</b> *** |
| 3RevT6 - 3RevT2 | -2.70538 | 0.42672 | -6.340 | <b>&lt;0.001</b> *** |
| 3RevT4 - 3RevT3 | 1.23711  | 0.37502 | 3.299  | 0.0904               |
| 3RevT5 - 3RevT3 | -1.67327 | 0.42850 | -3.905 | <b>0.0119</b> *      |
| 3RevT6 - 3RevT3 | -1.54543 | 0.42209 | -3.661 | <b>0.0284</b> *      |
| 3RevT5 - 3RevT4 | -2.91037 | 0.43283 | -6.724 | <b>&lt;0.001</b> *** |
| 3RevT6 - 3RevT4 | -2.78254 | 0.42648 | -6.524 | <b>&lt;0.001</b> *** |
| 3RevT6 - 3RevT5 | 0.12783  | 0.47420 | 0.270  | 1.0000               |



**Table S10.** Tukey test comparisons for chestnut leaves EPT richness (EPTS). Significance codes:  
 \*\*\*  $\leq 0.001$ ; \*\*  $\leq 0.01$ ; \*  $\leq 0.05$ .

| Comparison      | Estimate   | Std. Error | Z Value | p-Value    |
|-----------------|------------|------------|---------|------------|
| 1CriT2 - 1CriT1 | 1.178e-01  | 1.984e-01  | 0.594   | 1.0000     |
| 1CriT3 - 1CriT1 | -1.335e-01 | 2.205e-01  | -0.606  | 1.0000     |
| 1CriT4 - 1CriT1 | -7.859e-01 | 2.466e-01  | -3.186  | 0.1110     |
| 1CriT5 - 1CriT1 | -9.445e-01 | 2.887e-01  | -3.272  | 0.0876     |
| 1CriT6 - 1CriT1 | -8.267e-01 | 2.958e-01  | -2.795  | 0.2944     |
| 2SanT1 - 1CriT1 | -1.576e-01 | 2.127e-01  | -0.741  | 1.0000     |
| 2SanT2 - 1CriT1 | 1.892e-01  | 1.951e-01  | 0.970   | 1.0000     |
| 2SanT3 - 1CriT1 | -1.100e-01 | 2.100e-01  | -0.524  | 1.0000     |
| 2SanT4 - 1CriT1 | -4.256e-02 | 2.063e-01  | -0.206  | 1.0000     |
| 2SanT5 - 1CriT1 | 1.178e-01  | 1.984e-01  | 0.594   | 1.0000     |
| 2SanT6 - 1CriT1 | -5.349e-02 | 2.156e-01  | -0.248  | 1.0000     |
| 3RevT1 - 1CriT1 | -2.513e-01 | 2.282e-01  | -1.101  | 0.9997     |
| 3RevT2 - 1CriT1 | 1.892e-01  | 1.951e-01  | 0.970   | 1.0000     |
| 3RevT3 - 1CriT1 | -7.291e-02 | 2.011e-01  | -0.363  | 1.0000     |
| 3RevT4 - 1CriT1 | -4.372e-01 | 2.304e-01  | -1.898  | 0.9022     |
| 3RevT5 - 1CriT1 | -1.386e+00 | 3.227e-01  | -4.295  | <0.01 **   |
| 3RevT6 - 1CriT1 | -2.485e+00 | 5.204e-01  | -4.775  | <0.001 *** |
| 1CriT3 - 1CriT2 | -2.513e-01 | 2.152e-01  | -1.168  | 0.9994     |
| 1CriT4 - 1CriT2 | -9.036e-01 | 2.419e-01  | -3.735  | 0.0187 *   |
| 1CriT5 - 1CriT2 | -1.062e+00 | 2.846e-01  | -3.732  | 0.0190 *   |
| 1CriT6 - 1CriT2 | -9.445e-01 | 2.919e-01  | -3.236  | 0.0972     |
| 2SanT1 - 1CriT2 | -2.754e-01 | 2.071e-01  | -1.330  | 0.9973     |
| 2SanT2 - 1CriT2 | 7.146e-02  | 1.891e-01  | 0.378   | 1.0000     |
| 2SanT3 - 1CriT2 | -2.278e-01 | 2.044e-01  | -1.114  | 0.9997     |
| 2SanT4 - 1CriT2 | -1.603e-01 | 2.006e-01  | -0.799  | 1.0000     |
| 2SanT5 - 1CriT2 | 1.249e-16  | 1.925e-01  | 0.000   | 1.0000     |
| 2SanT6 - 1CriT2 | -1.713e-01 | 2.101e-01  | -0.815  | 1.0000     |
| 3RevT1 - 1CriT2 | -3.691e-01 | 2.231e-01  | -1.654  | 0.9703     |
| 3RevT2 - 1CriT2 | 7.146e-02  | 1.891e-01  | 0.378   | 1.0000     |
| 3RevT3 - 1CriT2 | -1.907e-01 | 1.953e-01  | -0.977  | 0.9999     |
| 3RevT4 - 1CriT2 | -5.550e-01 | 2.253e-01  | -2.463  | 0.5309     |
| 3RevT5 - 1CriT2 | -1.504e+00 | 3.191e-01  | -4.713  | <0.001 *** |
| 3RevT6 - 1CriT2 | -2.603e+00 | 5.182e-01  | -5.023  | <0.001 *** |
| 1CriT4 - 1CriT3 | -6.523e-01 | 2.603e-01  | -2.506  | 0.4994     |
| 1CriT5 - 1CriT3 | -8.109e-01 | 3.005e-01  | -2.699  | 0.3554     |
| 1CriT6 - 1CriT3 | -6.931e-01 | 3.073e-01  | -2.255  | 0.6922     |
| 2SanT1 - 1CriT3 | -2.410e-02 | 2.284e-01  | -0.106  | 1.0000     |
| 2SanT2 - 1CriT3 | 3.228e-01  | 2.122e-01  | 1.521   | 0.9873     |
| 2SanT3 - 1CriT3 | 2.353e-02  | 2.259e-01  | 0.104   | 1.0000     |
| 2SanT4 - 1CriT3 | 9.097e-02  | 2.225e-01  | 0.409   | 1.0000     |
| 2SanT5 - 1CriT3 | 2.513e-01  | 2.152e-01  | 1.168   | 0.9994     |
| 2SanT6 - 1CriT3 | 8.004e-02  | 2.311e-01  | 0.346   | 1.0000     |
| 3RevT1 - 1CriT3 | -1.178e-01 | 2.430e-01  | -0.485  | 1.0000     |
| 3RevT2 - 1CriT3 | 3.228e-01  | 2.122e-01  | 1.521   | 0.9872     |
| 3RevT3 - 1CriT3 | 6.062e-02  | 2.177e-01  | 0.279   | 1.0000     |
| 3RevT4 - 1CriT3 | -3.037e-01 | 2.450e-01  | -1.239  | 0.9988     |
| 3RevT5 - 1CriT3 | -1.253e+00 | 3.333e-01  | -3.758  | 0.0176 *   |
| 3RevT6 - 1CriT3 | -2.351e+00 | 5.270e-01  | -4.461  | <0.001 *** |
| 1CriT5 - 1CriT4 | -1.586e-01 | 3.202e-01  | -0.495  | 1.0000     |
| 1CriT6 - 1CriT4 | -4.082e-02 | 3.266e-01  | -0.125  | 1.0000     |
| 2SanT1 - 1CriT4 | 6.282e-01  | 2.538e-01  | 2.476   | 0.5223     |
| 2SanT2 - 1CriT4 | 9.751e-01  | 2.393e-01  | 4.076   | <0.01 **   |

|                 |            |           |        |                      |
|-----------------|------------|-----------|--------|----------------------|
| 2SanT3 - 1CriT4 | 6.759e-01  | 2.515e-01 | 2.687  | 0.3640               |
| 2SanT4 - 1CriT4 | 7.433e-01  | 2.485e-01 | 2.991  | 0.1861               |
| 2SanT5 - 1CriT4 | 9.036e-01  | 2.419e-01 | 3.735  | <b>0.0188 *</b>      |
| 2SanT6 - 1CriT4 | 7.324e-01  | 2.562e-01 | 2.859  | 0.2551               |
| 3RevT1 - 1CriT4 | 5.345e-01  | 2.669e-01 | 2.003  | 0.8540               |
| 3RevT2 - 1CriT4 | 9.751e-01  | 2.393e-01 | 4.076  | <b>&lt;0.01 **</b>   |
| 3RevT3 - 1CriT4 | 7.129e-01  | 2.441e-01 | 2.920  | 0.2211               |
| 3RevT4 - 1CriT4 | 3.486e-01  | 2.688e-01 | 1.297  | 0.9979               |
| 3RevT5 - 1CriT4 | -6.004e-01 | 3.512e-01 | -1.710 | 0.9592               |
| 3RevT6 - 1CriT4 | -1.699e+00 | 5.385e-01 | -3.155 | 0.1213               |
| 1CriT6 - 1CriT5 | 1.178e-01  | 3.594e-01 | 0.328  | 1.0000               |
| 2SanT1 - 1CriT5 | 7.868e-01  | 2.948e-01 | 2.669  | 0.3765               |
| 2SanT2 - 1CriT5 | 1.134e+00  | 2.824e-01 | 4.015  | <b>&lt;0.01 **</b>   |
| 2SanT3 - 1CriT5 | 8.345e-01  | 2.928e-01 | 2.850  | 0.2598               |
| 2SanT4 - 1CriT5 | 9.019e-01  | 2.902e-01 | 3.107  | 0.1401               |
| 2SanT5 - 1CriT5 | 1.062e+00  | 2.846e-01 | 3.732  | <b>0.0190 *</b>      |
| 2SanT6 - 1CriT5 | 8.910e-01  | 2.969e-01 | 3.001  | 0.1813               |
| 3RevT1 - 1CriT5 | 6.931e-01  | 3.062e-01 | 2.264  | 0.6860               |
| 3RevT2 - 1CriT5 | 1.134e+00  | 2.824e-01 | 4.015  | <b>&lt;0.01 **</b>   |
| 3RevT3 - 1CriT5 | 8.716e-01  | 2.865e-01 | 3.042  | 0.1656               |
| 3RevT4 - 1CriT5 | 5.072e-01  | 3.078e-01 | 1.648  | 0.9717               |
| 3RevT5 - 1CriT5 | -4.418e-01 | 3.819e-01 | -1.157 | 0.9995               |
| 3RevT6 - 1CriT5 | -1.540e+00 | 5.590e-01 | -2.756 | 0.3193               |
| 2SanT1 - 1CriT6 | 6.690e-01  | 3.018e-01 | 2.217  | 0.7201               |
| 2SanT2 - 1CriT6 | 1.016e+00  | 2.897e-01 | 3.507  | <b>0.0411 *</b>      |
| 2SanT3 - 1CriT6 | 7.167e-01  | 2.999e-01 | 2.390  | 0.5904               |
| 2SanT4 - 1CriT6 | 7.841e-01  | 2.973e-01 | 2.637  | 0.3991               |
| 2SanT5 - 1CriT6 | 9.445e-01  | 2.919e-01 | 3.236  | 0.0954               |
| 2SanT6 - 1CriT6 | 7.732e-01  | 3.038e-01 | 2.545  | 0.4699               |
| 3RevT1 - 1CriT6 | 5.754e-01  | 3.129e-01 | 1.839  | 0.9244               |
| 3RevT2 - 1CriT6 | 1.016e+00  | 2.897e-01 | 3.507  | <b>0.0414 *</b>      |
| 3RevT3 - 1CriT6 | 7.538e-01  | 2.937e-01 | 2.566  | 0.4514               |
| 3RevT4 - 1CriT6 | 3.895e-01  | 3.145e-01 | 1.238  | 0.9988               |
| 3RevT5 - 1CriT6 | -5.596e-01 | 3.873e-01 | -1.445 | 0.9928               |
| 3RevT6 - 1CriT6 | -1.658e+00 | 5.627e-01 | -2.947 | 0.2072               |
| 2SanT2 - 2SanT1 | 3.469e-01  | 2.040e-01 | 1.700  | 0.9614               |
| 2SanT3 - 2SanT1 | 4.763e-02  | 2.183e-01 | 0.218  | 1.0000               |
| 2SanT4 - 2SanT1 | 1.151e-01  | 2.148e-01 | 0.536  | 1.0000               |
| 2SanT5 - 2SanT1 | 2.754e-01  | 2.071e-01 | 1.330  | 0.9973               |
| 2SanT6 - 2SanT1 | 1.041e-01  | 2.237e-01 | 0.466  | 1.0000               |
| 3RevT1 - 2SanT1 | -9.369e-02 | 2.359e-01 | -0.397 | 1.0000               |
| 3RevT2 - 2SanT1 | 3.469e-01  | 2.040e-01 | 1.700  | 0.9614               |
| 3RevT3 - 2SanT1 | 8.472e-02  | 2.098e-01 | 0.404  | 1.0000               |
| 3RevT4 - 2SanT1 | -2.796e-01 | 2.380e-01 | -1.175 | 0.9994               |
| 3RevT5 - 2SanT1 | -1.229e+00 | 3.282e-01 | -3.744 | <b>0.0182 *</b>      |
| 3RevT6 - 2SanT1 | -2.327e+00 | 5.238e-01 | -4.443 | <b>&lt;0.01 **</b>   |
| 2SanT3 - 2SanT2 | -2.992e-01 | 2.012e-01 | -1.487 | 0.9901               |
| 2SanT4 - 2SanT2 | -2.318e-01 | 1.974e-01 | -1.174 | 0.9994               |
| 2SanT5 - 2SanT2 | -7.146e-02 | 1.891e-01 | -0.378 | 1.0000               |
| 2SanT6 - 2SanT2 | -2.427e-01 | 2.071e-01 | -1.172 | 0.9994               |
| 3RevT1 - 2SanT2 | -4.406e-01 | 2.202e-01 | -2.001 | 0.8539               |
| 3RevT2 - 2SanT2 | 2.498e-16  | 1.857e-01 | 0.000  | 1.0000               |
| 3RevT3 - 2SanT2 | -2.621e-01 | 1.920e-01 | -1.366 | 0.9962               |
| 3RevT4 - 2SanT2 | -6.265e-01 | 2.225e-01 | -2.816 | 0.2816               |
| 3RevT5 - 2SanT2 | -1.576e+00 | 3.171e-01 | -4.968 | <b>&lt;0.001 ***</b> |
| 3RevT6 - 2SanT2 | -2.674e+00 | 5.170e-01 | -5.173 | <b>&lt;0.001 ***</b> |

|                 |            |           |        |                      |
|-----------------|------------|-----------|--------|----------------------|
| 2SanT4 - 2SanT3 | 6.744e-02  | 2.121e-01 | 0.318  | 1.0000               |
| 2SanT5 - 2SanT3 | 2.278e-01  | 2.044e-01 | 1.114  | 0.9997               |
| 2SanT6 - 2SanT3 | 5.651e-02  | 2.211e-01 | 0.256  | 1.0000               |
| 3RevT1 - 2SanT3 | -1.413e-01 | 2.335e-01 | -0.605 | 1.0000               |
| 3RevT2 - 2SanT3 | 2.992e-01  | 2.012e-01 | 1.487  | 0.9900               |
| 3RevT4 - 2SanT3 | -3.272e-01 | 2.356e-01 | -1.389 | 0.9953               |
| 3RevT5 - 2SanT3 | -1.276e+00 | 3.265e-01 | -3.909 | <b>0.0103 *</b>      |
| 3RevT6 - 2SanT3 | -2.375e+00 | 5.227e-01 | -4.543 | <b>&lt;0.001 ***</b> |
| 2SanT5 - 2SanT4 | 1.603e-01  | 2.006e-01 | 0.799  | 1.0000               |
| 2SanT6 - 2SanT4 | -1.093e-02 | 2.177e-01 | -0.050 | 1.0000               |
| 3RevT1 - 2SanT4 | -2.088e-01 | 2.302e-01 | -0.907 | 1.0000               |
| 3RevT2 - 2SanT4 | 2.318e-01  | 1.974e-01 | 1.174  | 0.9994               |
| 3RevT3 - 2SanT4 | -3.035e-02 | 2.033e-01 | -0.149 | 1.0000               |
| 3RevT4 - 2SanT4 | -3.947e-01 | 2.324e-01 | -1.698 | 0.9623               |
| 3RevT5 - 2SanT4 | -1.344e+00 | 3.241e-01 | -4.145 | <b>&lt;0.01 **</b>   |
| 3RevT6 - 2SanT4 | -2.442e+00 | 5.213e-01 | -4.685 | <b>&lt;0.001 ***</b> |
| 2SanT6 - 2SanT5 | -1.713e-01 | 2.101e-01 | -0.815 | 1.0000               |
| 3RevT1 - 2SanT5 | -3.691e-01 | 2.231e-01 | -1.654 | 0.9703               |
| 3RevT2 - 2SanT5 | 7.146e-02  | 1.891e-01 | 0.378  | 1.0000               |
| 3RevT3 - 2SanT5 | -1.907e-01 | 1.953e-01 | -0.977 | 1.0000               |
| 3RevT4 - 2SanT5 | -5.550e-01 | 2.253e-01 | -2.463 | 0.5304               |
| 3RevT5 - 2SanT5 | -1.504e+00 | 3.191e-01 | -4.713 | <b>&lt;0.001 ***</b> |
| 3RevT6 - 2SanT5 | -2.603e+00 | 5.182e-01 | -5.023 | <b>&lt;0.001 ***</b> |
| 3RevT1 - 2SanT6 | -1.978e-01 | 2.385e-01 | -0.829 | 1.0000               |
| 3RevT2 - 2SanT6 | 2.427e-01  | 2.071e-01 | 1.172  | 0.9994               |
| 3RevT3 - 2SanT6 | -1.942e-02 | 2.127e-01 | -0.091 | 1.0000               |
| 3RevT4 - 2SanT6 | -3.837e-01 | 2.406e-01 | -1.595 | 0.9796               |
| 3RevT5 - 2SanT6 | -1.333e+00 | 3.301e-01 | -4.037 | <b>&lt;0.01 **</b>   |
| 3RevT6 - 2SanT6 | -2.431e+00 | 5.250e-01 | -4.631 | <b>&lt;0.001 ***</b> |
| 3RevT2 - 3RevT1 | 4.406e-01  | 2.202e-01 | 2.001  | 0.8544               |
| 3RevT3 - 3RevT1 | 1.784e-01  | 2.255e-01 | 0.791  | 1.0000               |
| 3RevT4 - 3RevT1 | -1.859e-01 | 2.520e-01 | -0.738 | 1.0000               |
| 3RevT5 - 3RevT1 | -1.135e+00 | 3.385e-01 | -3.353 | 0.0679               |
| 3RevT6 - 3RevT1 | -2.234e+00 | 5.303e-01 | -4.212 | <b>&lt;0.01 **</b>   |
| 3RevT3 - 3RevT2 | -2.621e-01 | 1.920e-01 | -1.366 | 0.9962               |
| 3RevT4 - 3RevT2 | -6.265e-01 | 2.225e-01 | -2.816 | 0.2792               |
| 3RevT5 - 3RevT2 | -1.576e+00 | 3.171e-01 | -4.968 | <b>&lt;0.001 ***</b> |
| 3RevT6 - 3RevT2 | -2.674e+00 | 5.170e-01 | -5.173 | <b>&lt;0.001 ***</b> |
| 3RevT4 - 3RevT3 | -3.643e-01 | 2.277e-01 | -1.600 | 0.9789               |
| 3RevT5 - 3RevT3 | -1.313e+00 | 3.208e-01 | -4.094 | <b>&lt;0.01 **</b>   |
| 3RevT6 - 3RevT3 | -2.412e+00 | 5.192e-01 | -4.645 | <b>&lt;0.001 ***</b> |
| 3RevT5 - 3RevT4 | -9.491e-01 | 3.400e-01 | -2.792 | 0.2952               |
| 3RevT6 - 3RevT4 | -2.048e+00 | 5.313e-01 | -3.854 | <b>0.0121 *</b>      |
| 3RevT6 - 3RevT5 | -1.099e+00 | 5.774e-01 | -1.903 | 0.8994               |

**Table S11.** Tukey test comparisons for chestnut leaves EPT abundance (EPTN). Significance codes: \*\*\*  $\leq 0.001$ ; \*\*  $\leq 0.01$ ; \*  $\leq 0.05$ .

| Comparison      | Estimate  | Std. Error | Z Value | p-Value              |
|-----------------|-----------|------------|---------|----------------------|
| 1CriT2 - 1CriT1 | 0.930902  | 0.272180   | 3.420   | 0.0580               |
| 1CriT3 - 1CriT1 | 1.064362  | 0.282468   | 3.768   | <b>0.0165 *</b>      |
| 1CriT4 - 1CriT1 | 0.296169  | 0.266344   | 1.112   | 0.9997               |
| 1CriT5 - 1CriT1 | 0.200671  | 0.286667   | 0.700   | 1.0000               |
| 1CriT6 - 1CriT1 | 0.754841  | 0.298050   | 2.533   | 0.4835               |
| 2SanT1 - 1CriT1 | -2.264364 | 0.337701   | -6.705  | <b>&lt;0.001 ***</b> |
| 2SanT2 - 1CriT1 | -1.151958 | 0.293384   | -3.926  | <b>0.0102 *</b>      |
| 2SanT3 - 1CriT1 | -1.658228 | 0.308387   | -5.377  | <b>&lt;0.001 ***</b> |
| 2SanT4 - 1CriT1 | -0.507944 | 0.282081   | -1.801  | 0.9380               |
| 2SanT5 - 1CriT1 | -0.500775 | 0.281990   | -1.776  | 0.9452               |
| 2SanT6 - 1CriT1 | 0.145455  | 0.287076   | 0.507   | 1.0000               |
| 3RevT1 - 1CriT1 | -2.343828 | 0.361493   | -6.484  | <b>&lt;0.001 ***</b> |
| 3RevT2 - 1CriT1 | -0.953781 | 0.289156   | -3.299  | 0.0825               |
| 3RevT3 - 1CriT1 | -1.465075 | 0.290716   | -5.040  | <b>&lt;0.001 ***</b> |
| 3RevT4 - 1CriT1 | -1.704748 | 0.310137   | -5.497  | <b>&lt;0.001 ***</b> |
| 3RevT5 - 1CriT1 | -3.496508 | 0.463931   | -7.537  | <b>&lt;0.001 ***</b> |
| 3RevT6 - 1CriT1 | -4.343805 | 0.636953   | -6.820  | <b>&lt;0.001 ***</b> |
| 1CriT3 - 1CriT2 | 0.133460  | 0.277787   | 0.480   | 1.0000               |
| 1CriT4 - 1CriT2 | -0.634733 | 0.261375   | -2.428  | 0.5661               |
| 1CriT5 - 1CriT2 | -0.730231 | 0.282056   | -2.589  | 0.4420               |
| 1CriT6 - 1CriT2 | -0.176061 | 0.293617   | -0.600  | 1.0000               |
| 2SanT1 - 1CriT2 | -3.195266 | 0.333795   | -9.573  | <b>&lt;0.001 ***</b> |
| 2SanT2 - 1CriT2 | -2.082860 | 0.288880   | -7.210  | <b>&lt;0.001 ***</b> |
| 2SanT3 - 1CriT2 | -2.589130 | 0.304105   | -8.514  | <b>&lt;0.001 ***</b> |
| 2SanT4 - 1CriT2 | -1.438846 | 0.277393   | -5.187  | <b>&lt;0.001 ***</b> |
| 2SanT5 - 1CriT2 | -1.431677 | 0.277301   | -5.163  | <b>&lt;0.001 ***</b> |
| 2SanT6 - 1CriT2 | -0.785447 | 0.282471   | -2.781  | 0.3079               |
| 3RevT1 - 1CriT2 | -3.274730 | 0.357848   | -9.151  | <b>&lt;0.001 ***</b> |
| 3RevT2 - 1CriT2 | -1.884683 | 0.284585   | -6.623  | <b>&lt;0.001 ***</b> |
| 3RevT3 - 1CriT2 | -2.395977 | 0.286170   | -8.373  | <b>&lt;0.001 ***</b> |
| 3RevT4 - 1CriT2 | -2.635650 | 0.305880   | -8.617  | <b>&lt;0.001 ***</b> |
| 3RevT5 - 1CriT2 | -4.427410 | 0.461096   | -9.602  | <b>&lt;0.001 ***</b> |
| 3RevT6 - 1CriT2 | -5.274708 | 0.634891   | -8.308  | <b>&lt;0.001 ***</b> |
| 1CriT4 - 1CriT3 | -0.768194 | 0.272072   | -2.823  | 0.2805               |
| 1CriT5 - 1CriT3 | -0.863692 | 0.291996   | -2.958  | 0.2078               |
| 1CriT6 - 1CriT3 | -0.309522 | 0.303179   | -1.021  | 0.9999               |
| 2SanT1 - 1CriT3 | -3.328726 | 0.342236   | -9.726  | <b>&lt;0.001 ***</b> |
| 2SanT2 - 1CriT3 | -2.216321 | 0.298593   | -7.423  | <b>&lt;0.001 ***</b> |
| 2SanT3 - 1CriT3 | -2.722590 | 0.313347   | -8.689  | <b>&lt;0.001 ***</b> |
| 2SanT4 - 1CriT3 | -1.572306 | 0.287495   | -5.469  | <b>&lt;0.001 ***</b> |
| 2SanT5 - 1CriT3 | -1.565138 | 0.287405   | -5.446  | <b>&lt;0.001 ***</b> |
| 2SanT6 - 1CriT3 | -0.918907 | 0.292398   | -3.143  | 0.1286               |
| 3RevT1 - 1CriT3 | -3.408190 | 0.365734   | -9.319  | <b>&lt;0.001 ***</b> |
| 3RevT2 - 1CriT3 | -2.018144 | 0.294440   | -6.854  | <b>&lt;0.001 ***</b> |
| 3RevT3 - 1CriT3 | -2.529438 | 0.295972   | -8.546  | <b>&lt;0.001 ***</b> |
| 3RevT4 - 1CriT3 | -2.769110 | 0.315069   | -8.789  | <b>&lt;0.001 ***</b> |
| 3RevT5 - 1CriT3 | -4.560870 | 0.467243   | -9.761  | <b>&lt;0.001 ***</b> |
| 3RevT6 - 1CriT3 | -5.408168 | 0.639369   | -8.459  | <b>&lt;0.001 ***</b> |
| 1CriT5 - 1CriT4 | -0.095498 | 0.276429   | -0.345  | 1.0000               |
| 1CriT6 - 1CriT4 | 0.458672  | 0.288216   | 1.591   | 0.9806               |
| 2SanT1 - 1CriT4 | -2.560533 | 0.329055   | -7.781  | <b>&lt;0.001 ***</b> |
| 2SanT2 - 1CriT4 | -1.448127 | 0.283388   | -5.110  | <b>&lt;0.001 ***</b> |

|                 |           |          |        |                      |
|-----------------|-----------|----------|--------|----------------------|
| 2SanT3 - 1CriT4 | -1.954397 | 0.298894 | -6.539 | <b>&lt;0.001 ***</b> |
| 2SanT4 - 1CriT4 | -0.804112 | 0.271670 | -2.960 | 0.2071               |
| 2SanT5 - 1CriT4 | -0.796944 | 0.271575 | -2.935 | 0.2178               |
| 2SanT6 - 1CriT4 | -0.150714 | 0.276853 | -0.544 | 1.0000               |
| 3RevT1 - 1CriT4 | -2.639997 | 0.353429 | -7.470 | <b>&lt;0.001 ***</b> |
| 3RevT2 - 1CriT4 | -1.249950 | 0.279009 | -4.480 | <b>&lt;0.001 ***</b> |
| 3RevT3 - 1CriT4 | -1.761244 | 0.280626 | -6.276 | <b>&lt;0.001 ***</b> |
| 3RevT4 - 1CriT4 | -2.000917 | 0.300699 | -6.654 | <b>&lt;0.001 ***</b> |
| 3RevT5 - 1CriT4 | -3.792676 | 0.457676 | -8.287 | <b>&lt;0.001 ***</b> |
| 3RevT6 - 1CriT4 | -4.639974 | 0.632411 | -7.337 | <b>&lt;0.001 ***</b> |
| 1CriT6 - 1CriT5 | 0.554170  | 0.307095 | 1.805  | 0.9365               |
| 2SanT1 - 1CriT5 | -2.465035 | 0.345710 | -7.130 | <b>&lt;0.001 ***</b> |
| 2SanT2 - 1CriT5 | -1.352629 | 0.302568 | -4.470 | <b>&lt;0.001 ***</b> |
| 2SanT3 - 1CriT5 | -1.858899 | 0.317138 | -5.861 | <b>&lt;0.001 ***</b> |
| 2SanT4 - 1CriT5 | -0.708614 | 0.291622 | -2.430 | 0.5648               |
| 2SanT5 - 1CriT5 | -0.701446 | 0.291534 | -2.406 | 0.5833               |
| 2SanT6 - 1CriT5 | -0.055216 | 0.296456 | -0.186 | 1.0000               |
| 3RevT1 - 1CriT5 | -2.544499 | 0.368987 | -6.896 | <b>&lt;0.001 ***</b> |
| 3RevT2 - 1CriT5 | -1.154452 | 0.298471 | -3.868 | <b>0.0125 *</b>      |
| 3RevT3 - 1CriT5 | -1.665746 | 0.299983 | -5.553 | <b>&lt;0.001 ***</b> |
| 3RevT4 - 1CriT5 | -1.905419 | 0.318839 | -5.976 | <b>&lt;0.001 ***</b> |
| 3RevT5 - 1CriT5 | -3.697178 | 0.469794 | -7.870 | <b>&lt;0.001 ***</b> |
| 3RevT6 - 1CriT5 | -4.544476 | 0.641235 | -7.087 | <b>&lt;0.001 ***</b> |
| 2SanT1 - 1CriT6 | -3.019205 | 0.355206 | -8.500 | <b>&lt;0.001 ***</b> |
| 2SanT2 - 1CriT6 | -1.906799 | 0.313374 | -6.085 | <b>&lt;0.001 ***</b> |
| 2SanT3 - 1CriT6 | -2.413069 | 0.327463 | -7.369 | <b>&lt;0.001 ***</b> |
| 2SanT4 - 1CriT6 | -1.262785 | 0.302818 | -4.170 | <b>&lt;0.01 **</b>   |
| 2SanT5 - 1CriT6 | -1.255616 | 0.302733 | -4.148 | <b>&lt;0.01 **</b>   |
| 2SanT6 - 1CriT6 | -0.609386 | 0.307477 | -1.982 | 0.8672               |
| 3RevT1 - 1CriT6 | -3.098669 | 0.377898 | -8.200 | <b>&lt;0.001 ***</b> |
| 3RevT2 - 1CriT6 | -1.708622 | 0.309420 | -5.522 | <b>&lt;0.001 ***</b> |
| 3RevT3 - 1CriT6 | -2.219916 | 0.310878 | -7.141 | <b>&lt;0.001 ***</b> |
| 3RevT4 - 1CriT6 | -2.459589 | 0.329111 | -7.473 | <b>&lt;0.001 ***</b> |
| 3RevT5 - 1CriT6 | -4.251348 | 0.476825 | -8.916 | <b>&lt;0.001 ***</b> |
| 3RevT6 - 1CriT6 | -5.098646 | 0.646404 | -7.888 | <b>&lt;0.001 ***</b> |
| 2SanT2 - 2SanT1 | 1.112406  | 0.351300 | 3.167  | 0.1205               |
| 2SanT3 - 2SanT1 | 0.606136  | 0.363923 | 1.666  | 0.9696               |
| 2SanT4 - 2SanT1 | 1.756420  | 0.341917 | 5.137  | <b>&lt;0.001 ***</b> |
| 2SanT5 - 2SanT1 | 1.763589  | 0.341842 | 5.159  | <b>&lt;0.001 ***</b> |
| 2SanT6 - 2SanT1 | 2.409819  | 0.346050 | 6.964  | <b>&lt;0.001 ***</b> |
| 3RevT1 - 2SanT1 | -0.079464 | 0.409896 | -0.194 | 1.0000               |
| 3RevT2 - 2SanT1 | 1.310583  | 0.347777 | 3.768  | <b>0.0169 *</b>      |
| 3RevT3 - 2SanT1 | 0.799289  | 0.349075 | 2.290  | 0.6720               |
| 3RevT4 - 2SanT1 | 0.559616  | 0.365407 | 1.531  | 0.9870               |
| 3RevT5 - 2SanT1 | -1.232144 | 0.502564 | -2.452 | 0.5467               |
| 3RevT6 - 2SanT1 | -2.079442 | 0.665617 | -3.124 | 0.1366               |
| 2SanT3 - 2SanT2 | -0.506270 | 0.323222 | -1.566 | 0.9835               |
| 2SanT4 - 2SanT2 | 0.644014  | 0.298227 | 2.159  | 0.7660               |
| 2SanT5 - 2SanT2 | 0.651183  | 0.298141 | 2.184  | 0.7483               |
| 2SanT6 - 2SanT2 | 1.297413  | 0.302956 | 4.283  | <b>&lt;0.01 **</b>   |
| 3RevT1 - 2SanT2 | -1.191870 | 0.374229 | -3.185 | 0.1152               |
| 3RevT2 - 2SanT2 | 0.198177  | 0.304928 | 0.650  | 1.0000               |
| 3RevT3 - 2SanT2 | -0.313117 | 0.306407 | -1.022 | 0.9999               |
| 3RevT4 - 2SanT2 | -0.552790 | 0.324891 | -1.701 | 0.9630               |
| 3RevT5 - 2SanT2 | -2.344549 | 0.473922 | -4.947 | <b>&lt;0.001 ***</b> |
| 3RevT6 - 2SanT2 | -3.191847 | 0.644266 | -4.954 | <b>&lt;0.001 ***</b> |

|                 |           |          |        |                      |
|-----------------|-----------|----------|--------|----------------------|
| 2SanT4 - 2SanT3 | 1.150284  | 0.312998 | 3.675  | <b>0.0249 *</b>      |
| 2SanT5 - 2SanT3 | 1.157453  | 0.312916 | 3.699  | <b>0.0225 *</b>      |
| 2SanT6 - 2SanT3 | 1.803683  | 0.317507 | 5.681  | <b>&lt;0.001 ***</b> |
| 3RevT1 - 2SanT3 | -0.685600 | 0.386103 | -1.776 | 0.9452               |
| 3RevT2 - 2SanT3 | 0.704447  | 0.319389 | 2.206  | 0.7336               |
| 3RevT3 - 2SanT3 | 0.193153  | 0.320802 | 0.602  | 1.0000               |
| 3RevT4 - 2SanT3 | -0.046520 | 0.338501 | -0.137 | 1.0000               |
| 3RevT5 - 2SanT3 | -1.838279 | 0.483354 | -3.803 | <b>0.0158 *</b>      |
| 3RevT6 - 2SanT3 | -2.685577 | 0.651235 | -4.124 | <b>&lt;0.01 **</b>   |
| 2SanT5 - 2SanT4 | 0.007168  | 0.287025 | 0.025  | 1.0000               |
| 2SanT6 - 2SanT4 | 0.653399  | 0.292024 | 2.237  | 0.7110               |
| 3RevT1 - 2SanT4 | -1.835884 | 0.365435 | -5.024 | <b>&lt;0.001 ***</b> |
| 3RevT2 - 2SanT4 | -0.445838 | 0.294069 | -1.516 | 0.9882               |
| 3RevT3 - 2SanT4 | -0.957131 | 0.295603 | -3.238 | 0.0987               |
| 3RevT4 - 2SanT4 | -1.196804 | 0.314722 | -3.803 | <b>0.0150 *</b>      |
| 3RevT5 - 2SanT4 | -2.988564 | 0.467009 | -6.399 | <b>&lt;0.001 ***</b> |
| 3RevT6 - 2SanT4 | -3.835862 | 0.639198 | -6.001 | <b>&lt;0.001 ***</b> |
| 2SanT6 - 2SanT5 | 0.646230  | 0.291936 | 2.214  | 0.7270               |
| 3RevT1 - 2SanT5 | -1.843053 | 0.365365 | -5.044 | <b>&lt;0.001 ***</b> |
| 3RevT2 - 2SanT5 | -0.453006 | 0.293981 | -1.541 | 0.9859               |
| 3RevT3 - 2SanT5 | -0.964300 | 0.295516 | -3.263 | 0.0919               |
| 3RevT4 - 2SanT5 | -1.203973 | 0.314641 | -3.827 | <b>0.0139 *</b>      |
| 3RevT5 - 2SanT5 | -2.995732 | 0.466954 | -6.415 | <b>&lt;0.001 ***</b> |
| 3RevT6 - 2SanT5 | -3.843030 | 0.639158 | -6.013 | <b>&lt;0.001 ***</b> |
| 3RevT1 - 2SanT6 | -2.489283 | 0.369304 | -6.740 | <b>&lt;0.001 ***</b> |
| 3RevT2 - 2SanT6 | -1.099236 | 0.298864 | -3.678 | <b>0.0245 *</b>      |
| 3RevT3 - 2SanT6 | -1.610530 | 0.300373 | -5.362 | <b>&lt;0.001 ***</b> |
| 3RevT4 - 2SanT6 | -1.850203 | 0.319207 | -5.796 | <b>&lt;0.001 ***</b> |
| 3RevT5 - 2SanT6 | -3.641963 | 0.470043 | -7.748 | <b>&lt;0.001 ***</b> |
| 3RevT6 - 2SanT6 | -4.489260 | 0.641418 | -6.999 | <b>&lt;0.001 ***</b> |
| 3RevT2 - 3RevT1 | 1.390047  | 0.370924 | 3.748  | <b>0.0187 *</b>      |
| 3RevT3 - 3RevT1 | 0.878753  | 0.372141 | 2.361  | 0.6178               |
| 3RevT4 - 3RevT1 | 0.639080  | 0.387502 | 1.649  | 0.9721               |
| 3RevT5 - 3RevT1 | -1.152680 | 0.518850 | -2.222 | 0.7223               |
| 3RevT6 - 3RevT1 | -1.999977 | 0.677998 | -2.950 | 0.2094               |
| 3RevT3 - 3RevT2 | -0.511294 | 0.302362 | -1.691 | 0.9653               |
| 3RevT4 - 3RevT2 | -0.750967 | 0.321079 | -2.339 | 0.6339               |
| 3RevT5 - 3RevT2 | -2.542726 | 0.471317 | -5.395 | <b>&lt;0.001 ***</b> |
| 3RevT6 - 3RevT2 | -3.390024 | 0.642352 | -5.278 | <b>&lt;0.001 ***</b> |
| 3RevT4 - 3RevT3 | -0.239673 | 0.322485 | -0.743 | 1.0000               |
| 3RevT5 - 3RevT3 | -2.031432 | 0.472275 | -4.301 | <b>&lt;0.01 **</b>   |
| 3RevT6 - 3RevT3 | -2.878730 | 0.643055 | -4.477 | <b>&lt;0.001 ***</b> |
| 3RevT5 - 3RevT4 | -1.791759 | 0.484472 | -3.698 | <b>0.0233 *</b>      |
| 3RevT6 - 3RevT4 | -2.639057 | 0.652065 | -4.047 | <b>&lt;0.01 **</b>   |
| 3RevT6 - 3RevT5 | -0.847298 | 0.737724 | -1.149 | 0.9996               |

**Table S12.** Tukey test comparisons for chestnut leaves shredder abundance (ShN). Significance codes: \*\*\*  $\leq 0.001$ ; \*\*  $\leq 0.01$ ; \*  $\leq 0.05$ .

| Comparison      | Estimate | Std. Error | Z Value | p-Value              |
|-----------------|----------|------------|---------|----------------------|
| 1CriT2 - 1CriT1 | 0.88864  | 0.28269    | 3.144   | 0.1221               |
| 1CriT3 - 1CriT1 | 1.09380  | 0.29316    | 3.731   | <b>0.0196 *</b>      |
| 1CriT4 - 1CriT1 | 0.28398  | 0.27648    | 1.027   | 0.9999               |
| 1CriT5 - 1CriT1 | 0.24946  | 0.29715    | 0.840   | 1.0000               |
| 1CriT6 - 1CriT1 | 0.61273  | 0.31014    | 1.976   | 0.8606               |
| 2SanT1 - 1CriT1 | -2.99573 | 0.41104    | -7.288  | <b>&lt;0.001 ***</b> |
| 2SanT2 - 1CriT1 | -1.63243 | 0.31827    | -5.129  | <b>&lt;0.001 ***</b> |
| 2SanT3 - 1CriT1 | -2.13553 | 0.34133    | -6.257  | <b>&lt;0.001 ***</b> |
| 2SanT4 - 1CriT1 | -1.13095 | 0.30352    | -3.726  | <b>0.0175 *</b>      |
| 2SanT5 - 1CriT1 | -1.11696 | 0.30320    | -3.684  | <b>0.0210 *</b>      |
| 2SanT6 - 1CriT1 | -0.23553 | 0.30146    | -0.781  | 1.0000               |
| 3RevT1 - 1CriT1 | -3.44772 | 0.50083    | -6.884  | <b>&lt;0.001 ***</b> |
| 3RevT2 - 1CriT1 | -1.78271 | 0.32414    | -5.500  | <b>&lt;0.001 ***</b> |
| 3RevT3 - 1CriT1 | -2.58272 | 0.35508    | -7.274  | <b>&lt;0.001 ***</b> |
| 3RevT4 - 1CriT1 | -2.06142 | 0.33728    | -6.112  | <b>&lt;0.001 ***</b> |
| 3RevT5 - 1CriT1 | -4.70048 | 0.76029    | -6.182  | <b>&lt;0.001 ***</b> |
| 3RevT6 - 1CriT1 | -5.39363 | 1.03829    | -5.195  | <b>&lt;0.001 ***</b> |
| 1CriT3 - 1CriT2 | 0.20516  | 0.28856    | 0.711   | 1.0000               |
| 1CriT4 - 1CriT2 | -0.60466 | 0.27160    | -2.226  | 0.7050               |
| 1CriT5 - 1CriT2 | -0.63918 | 0.29261    | -2.184  | 0.7343               |
| 1CriT6 - 1CriT2 | -0.27591 | 0.30580    | -0.902  | 1.0000               |
| 2SanT1 - 1CriT2 | -3.88437 | 0.40777    | -9.526  | <b>&lt;0.001 ***</b> |
| 2SanT2 - 1CriT2 | -2.52107 | 0.31404    | -8.028  | <b>&lt;0.001 ***</b> |
| 2SanT3 - 1CriT2 | -3.02417 | 0.33738    | -8.964  | <b>&lt;0.001 ***</b> |
| 2SanT4 - 1CriT2 | -2.01959 | 0.29908    | -6.753  | <b>&lt;0.001 ***</b> |
| 2SanT5 - 1CriT2 | -2.00560 | 0.29875    | -6.713  | <b>&lt;0.001 ***</b> |
| 2SanT6 - 1CriT2 | -1.12417 | 0.29699    | -3.785  | <b>0.0151 *</b>      |
| 3RevT1 - 1CriT2 | -4.33636 | 0.49815    | -8.705  | <b>&lt;0.001 ***</b> |
| 3RevT2 - 1CriT2 | -2.67135 | 0.31999    | -8.348  | <b>&lt;0.001 ***</b> |
| 3RevT3 - 1CriT2 | -3.47136 | 0.35129    | -9.882  | <b>&lt;0.001 ***</b> |
| 3RevT4 - 1CriT2 | -2.95006 | 0.33329    | -8.851  | <b>&lt;0.001 ***</b> |
| 3RevT5 - 1CriT2 | -5.58912 | 0.75853    | -7.368  | <b>&lt;0.001 ***</b> |
| 3RevT6 - 1CriT2 | -6.28227 | 1.03700    | -6.058  | <b>&lt;0.001 ***</b> |
| 1CriT4 - 1CriT3 | -0.80982 | 0.28248    | -2.867  | 0.2435               |
| 1CriT5 - 1CriT3 | -0.84434 | 0.30274    | -2.789  | 0.2891               |
| 1CriT6 - 1CriT3 | -0.48108 | 0.31551    | -1.525  | 0.9860               |
| 2SanT1 - 1CriT3 | -4.08954 | 0.41510    | -9.852  | <b>&lt;0.001 ***</b> |
| 2SanT2 - 1CriT3 | -2.72623 | 0.32350    | -8.427  | <b>&lt;0.001 ***</b> |
| 2SanT3 - 1CriT3 | -3.22933 | 0.34621    | -9.328  | <b>&lt;0.001 ***</b> |
| 2SanT4 - 1CriT3 | -2.22475 | 0.30900    | -7.200  | <b>&lt;0.001 ***</b> |
| 2SanT5 - 1CriT3 | -2.21076 | 0.30868    | -7.162  | <b>&lt;0.001 ***</b> |
| 2SanT6 - 1CriT3 | -1.32933 | 0.30697    | -4.330  | <b>&lt;0.01 **</b>   |
| 3RevT1 - 1CriT3 | -4.54152 | 0.50417    | -9.008  | <b>&lt;0.001 ***</b> |
| 3RevT2 - 1CriT3 | -2.87651 | 0.32928    | -8.736  | <b>&lt;0.001 ***</b> |
| 3RevT3 - 1CriT3 | -3.67652 | 0.35977    | -10.219 | <b>&lt;0.001 ***</b> |
| 3RevT4 - 1CriT3 | -3.15523 | 0.34222    | -9.220  | <b>&lt;0.001 ***</b> |
| 3RevT5 - 1CriT3 | -5.79428 | 0.76249    | -7.599  | <b>&lt;0.001 ***</b> |
| 3RevT6 - 1CriT3 | -6.48743 | 1.03990    | -6.238  | <b>&lt;0.001 ***</b> |
| 1CriT5 - 1CriT4 | -0.03452 | 0.28662    | -0.120  | 1.0000               |
| 1CriT6 - 1CriT4 | 0.32874  | 0.30007    | 1.096   | 0.9997               |
| 2SanT1 - 1CriT4 | -3.27971 | 0.40349    | -8.128  | <b>&lt;0.001 ***</b> |
| 2SanT2 - 1CriT4 | -1.91641 | 0.30847    | -6.213  | <b>&lt;0.001 ***</b> |

|                 |          |         |        |                      |
|-----------------|----------|---------|--------|----------------------|
| 2SanT3 - 1CriT4 | -2.41951 | 0.33220 | -7.283 | <b>&lt;0.001 ***</b> |
| 2SanT4 - 1CriT4 | -1.41493 | 0.29323 | -4.825 | <b>&lt;0.001 ***</b> |
| 2SanT5 - 1CriT4 | -1.40094 | 0.29289 | -4.783 | <b>&lt;0.001 ***</b> |
| 2SanT6 - 1CriT4 | -0.51951 | 0.29109 | -1.785 | 0.9378               |
| 3RevT1 - 1CriT4 | -3.73170 | 0.49466 | -7.544 | <b>&lt;0.001 ***</b> |
| 3RevT2 - 1CriT4 | -2.06669 | 0.31452 | -6.571 | <b>&lt;0.001 ***</b> |
| 3RevT3 - 1CriT4 | -2.86670 | 0.34632 | -8.278 | <b>&lt;0.001 ***</b> |
| 3RevT4 - 1CriT4 | -2.34541 | 0.32804 | -7.150 | <b>&lt;0.001 ***</b> |
| 3RevT5 - 1CriT4 | -4.98446 | 0.75624 | -6.591 | <b>&lt;0.001 ***</b> |
| 3RevT6 - 1CriT4 | -5.67761 | 1.03532 | -5.484 | <b>&lt;0.001 ***</b> |
| 1CriT6 - 1CriT5 | 0.36326  | 0.31922 | 1.138  | 0.9996               |
| 2SanT1 - 1CriT5 | -3.24519 | 0.41793 | -7.765 | <b>&lt;0.001 ***</b> |
| 2SanT2 - 1CriT5 | -1.88189 | 0.32712 | -5.753 | <b>&lt;0.001 ***</b> |
| 2SanT3 - 1CriT5 | -2.38499 | 0.34959 | -6.822 | <b>&lt;0.001 ***</b> |
| 2SanT4 - 1CriT5 | -1.38041 | 0.31279 | -4.413 | <b>&lt;0.001 ***</b> |
| 2SanT5 - 1CriT5 | -1.36642 | 0.31248 | -4.373 | <b>&lt;0.01 **</b>   |
| 2SanT6 - 1CriT5 | -0.48499 | 0.31079 | -1.561 | 0.90826              |
| 3RevT1 - 1CriT5 | -3.69718 | 0.50650 | -7.299 | <b>&lt;0.001 ***</b> |
| 3RevT2 - 1CriT5 | -2.03217 | 0.33284 | -6.106 | <b>&lt;0.001 ***</b> |
| 3RevT3 - 1CriT5 | -2.83218 | 0.36303 | -7.801 | <b>&lt;0.001 ***</b> |
| 3RevT4 - 1CriT5 | -2.31088 | 0.34564 | -6.686 | <b>&lt;0.001 ***</b> |
| 3RevT5 - 1CriT5 | -4.94994 | 0.76404 | -6.479 | <b>&lt;0.001 ***</b> |
| 3RevT6 - 1CriT5 | -5.64309 | 1.04103 | -5.421 | <b>&lt;0.001 ***</b> |
| 2SanT1 - 1CriT6 | -3.60846 | 0.42726 | -8.446 | <b>&lt;0.001 ***</b> |
| 2SanT2 - 1CriT6 | -2.24515 | 0.33897 | -6.623 | <b>&lt;0.001 ***</b> |
| 2SanT3 - 1CriT6 | -2.74826 | 0.36070 | -7.619 | <b>&lt;0.001 ***</b> |
| 2SanT4 - 1CriT6 | -1.74367 | 0.32516 | -5.363 | <b>&lt;0.001 ***</b> |
| 2SanT5 - 1CriT6 | -1.72969 | 0.32486 | -5.324 | <b>&lt;0.001 ***</b> |
| 2SanT6 - 1CriT6 | -0.84826 | 0.32323 | -2.624 | 0.3984               |
| 3RevT1 - 1CriT6 | -4.06044 | 0.51423 | -7.896 | <b>&lt;0.001 ***</b> |
| 3RevT2 - 1CriT6 | -2.39544 | 0.34449 | -6.954 | <b>&lt;0.001 ***</b> |
| 3RevT3 - 1CriT6 | -3.19545 | 0.37374 | -8.550 | <b>&lt;0.001 ***</b> |
| 3RevT4 - 1CriT6 | -2.67415 | 0.35687 | -7.493 | <b>&lt;0.001 ***</b> |
| 3RevT5 - 1CriT6 | -5.31321 | 0.76918 | -6.908 | <b>&lt;0.001 ***</b> |
| 3RevT6 - 1CriT6 | -6.00635 | 1.04482 | -5.749 | <b>&lt;0.001 ***</b> |
| 2SanT2 - 2SanT1 | 1.36330  | 0.43320 | 3.147  | 0.1192               |
| 2SanT3 - 2SanT1 | 0.86020  | 0.45041 | 1.910  | 0.8925               |
| 2SanT4 - 2SanT1 | 1.86478  | 0.42248 | 4.414  | <b>&lt;0.01 **</b>   |
| 2SanT5 - 2SanT1 | 1.87877  | 0.42225 | 4.449  | <b>&lt;0.01 **</b>   |
| 2SanT6 - 2SanT1 | 2.76020  | 0.42100 | 6.556  | <b>&lt;0.001 ***</b> |
| 3RevT1 - 2SanT1 | -0.45199 | 0.58069 | -0.778 | 1.0000               |
| 3RevT2 - 2SanT1 | 1.21302  | 0.43753 | 2.772  | 0.2995               |
| 3RevT3 - 2SanT1 | 0.41301  | 0.46092 | 0.896  | 1.0000               |
| 3RevT4 - 2SanT1 | 0.93431  | 0.44735 | 2.089  | 0.7972               |
| 3RevT5 - 2SanT1 | -1.70475 | 0.81511 | -2.091 | 0.7963               |
| 3RevT6 - 2SanT1 | -2.39790 | 1.07908 | -2.222 | 0.7078               |
| 2SanT3 - 2SanT2 | -0.50310 | 0.36771 | -1.368 | 0.9958               |
| 2SanT4 - 2SanT2 | 0.50148  | 0.33292 | 1.506  | 0.9879               |
| 2SanT5 - 2SanT2 | 0.51547  | 0.33263 | 1.550  | 0.9837               |
| 2SanT6 - 2SanT2 | 1.39690  | 0.33104 | 4.220  | <b>&lt;0.01 **</b>   |
| 3RevT1 - 2SanT2 | -1.81529 | 0.51918 | -3.496 | <b>0.0412 *</b>      |
| 3RevT2 - 2SanT2 | -0.15028 | 0.35182 | -0.427 | 1.0000               |
| 3RevT3 - 2SanT2 | -0.95029 | 0.38051 | -2.497 | 0.4951               |
| 3RevT4 - 2SanT2 | -0.42900 | 0.36396 | -1.179 | 0.9993               |
| 3RevT5 - 2SanT2 | -3.06805 | 0.77250 | -3.972 | <b>&lt;0.01 **</b>   |
| 3RevT6 - 2SanT2 | -3.76120 | 1.04726 | -3.591 | <b>0.0302 *</b>      |



|                 |          |         |        |                      |
|-----------------|----------|---------|--------|----------------------|
| 2SanT4 - 2SanT3 | 1.00458  | 0.35502 | 2.830  | 0.2617               |
| 2SanT5 - 2SanT3 | 1.01857  | 0.35475 | 2.871  | 0.2397               |
| 2SanT6 - 2SanT3 | 1.90000  | 0.35326 | 5.378  | <b>&lt;0.001 ***</b> |
| 3RevT1 - 2SanT3 | -1.31219 | 0.53362 | -2.459 | 0.5249               |
| 3RevT2 - 2SanT3 | 0.35282  | 0.37281 | 0.946  | 1.0000               |
| 3RevT3 - 2SanT3 | -0.44719 | 0.39999 | -1.118 | 0.9997               |
| 3RevT4 - 2SanT3 | 0.07411  | 0.38428 | 0.193  | 1.0000               |
| 3RevT5 - 2SanT3 | -2.56495 | 0.78228 | -3.279 | 0.0831               |
| 3RevT6 - 2SanT3 | -3.25810 | 1.05449 | -3.090 | 0.1390               |
| 2SanT5 - 2SanT4 | 0.01399  | 0.31854 | 0.044  | 1.0000               |
| 2SanT6 - 2SanT4 | 0.89542  | 0.31689 | 2.826  | 0.2662               |
| 3RevT1 - 2SanT4 | -2.31677 | 0.51027 | -4.540 | <b>&lt;0.001 ***</b> |
| 3RevT2 - 2SanT4 | -0.65176 | 0.33854 | -1.925 | 0.8856               |
| 3RevT3 - 2SanT4 | -1.45177 | 0.36826 | -3.942 | <b>&lt;0.01 **</b>   |
| 3RevT4 - 2SanT4 | -0.93048 | 0.35113 | -2.650 | 0.3807               |
| 3RevT5 - 2SanT4 | -3.56953 | 0.76654 | -4.657 | <b>&lt;0.001 ***</b> |
| 3RevT6 - 2SanT4 | -4.26268 | 1.04287 | -4.087 | <b>&lt;0.01 **</b>   |
| 2SanT6 - 2SanT5 | 0.88143  | 0.31658 | 2.784  | 0.2932               |
| 3RevT1 - 2SanT5 | -2.33076 | 0.51007 | -4.569 | <b>&lt;0.001 ***</b> |
| 3RevT2 - 2SanT5 | -0.66575 | 0.33825 | -1.968 | 0.8658               |
| 3RevT3 - 2SanT5 | -1.46576 | 0.36800 | -3.983 | <b>&lt;0.01 **</b>   |
| 3RevT4 - 2SanT5 | -0.94446 | 0.35086 | -2.692 | 0.3522               |
| 3RevT5 - 2SanT5 | -3.58352 | 0.76641 | -4.676 | <b>&lt;0.001 ***</b> |
| 3RevT6 - 2SanT5 | -4.27667 | 1.04278 | -4.101 | <b>&lt;0.01 **</b>   |
| 3RevT1 - 2SanT6 | -3.21219 | 0.50904 | -6.310 | <b>&lt;0.001 ***</b> |
| 3RevT2 - 2SanT6 | -1.54718 | 0.33669 | -4.595 | <b>&lt;0.001 ***</b> |
| 3RevT3 - 2SanT6 | -2.34719 | 0.36657 | -6.403 | <b>&lt;0.001 ***</b> |
| 3RevT4 - 2SanT6 | -1.82589 | 0.34935 | -5.227 | <b>&lt;0.001 ***</b> |
| 3RevT5 - 2SanT6 | -4.46495 | 0.76572 | -5.831 | <b>&lt;0.001 ***</b> |
| 3RevT6 - 2SanT6 | -5.15810 | 1.04227 | -4.949 | <b>&lt;0.001 ***</b> |
| 3RevT2 - 3RevT1 | 1.66501  | 0.52280 | 3.185  | 0.1061               |
| 3RevT3 - 3RevT1 | 0.86500  | 0.54252 | 1.594  | 0.9785               |
| 3RevT4 - 3RevT1 | 1.38629  | 0.53104 | 2.611  | 0.4081               |
| 3RevT5 - 3RevT1 | -1.25276 | 0.86388 | -1.450 | 0.9919               |
| 3RevT6 - 3RevT1 | -1.94591 | 1.11637 | -1.743 | 0.9494               |
| 3RevT3 - 3RevT2 | -0.80001 | 0.38544 | -2.076 | 0.8063               |
| 3RevT4 - 3RevT2 | -0.27871 | 0.36910 | -0.755 | 1.0000               |
| 3RevT5 - 3RevT2 | -2.91777 | 0.77493 | -3.765 | <b>0.0171 *</b>      |
| 3RevT6 - 3RevT2 | -3.61092 | 1.04906 | -3.442 | 0.0501               |
| 3RevT4 - 3RevT3 | 0.52130  | 0.39655 | 1.315  | 0.9973               |
| 3RevT5 - 3RevT3 | -2.11776 | 0.78837 | -2.686 | 0.3553               |
| 3RevT6 - 3RevT3 | -2.81091 | 1.05903 | -2.654 | 0.3783               |
| 3RevT5 - 3RevT4 | -2.63906 | 0.78052 | -3.381 | 0.0602               |
| 3RevT6 - 3RevT4 | -3.33220 | 1.05319 | -3.164 | 0.1135               |
| 3RevT6 - 3RevT5 | -0.69315 | 1.25439 | -0.553 | 1.0000               |

**Table S13.** Indicator species analysis results for both leaf types. Significance codes: \*\*\*  $\leq 0.001$ ; \*\*  $\leq 0.01$ ; \*  $\leq 0.05$ .

| Leaf Type              | Site     | Taxon                   | IndVal | <i>p</i>  |
|------------------------|----------|-------------------------|--------|-----------|
| <i>Quercus robur</i>   | Crissolo | Limnephilidae           | 0.982  | 0.001 *** |
|                        |          | <i>Nemoura</i>          | 0.879  | 0.001 *** |
|                        |          | <i>Protonemura</i>      | 0.840  | 0.001 *** |
|                        |          | <i>Dugesia</i>          | 0.831  | 0.001 *** |
|                        |          | <i>Crenobia</i>         | 0.787  | 0.001 *** |
|                        |          | Tipulidae               | 0.617  | 0.001 *** |
|                        |          | Hydracarina             | 0.560  | 0.001 *** |
|                        |          | Psychodidae             | 0.408  | 0.003 **  |
|                        |          | Sericostomatidae        | 0.309  | 0.019 *   |
|                        | Sanfront | <i>Amphinemura</i>      | 0.781  | 0.001 *** |
|                        |          | Hydropsichidae          | 0.774  | 0.001 *** |
|                        |          | <i>Paraleptophlebia</i> | 0.720  | 0.001 *** |
|                        |          | Rhyacophilidae          | 0.407  | 0.032 *   |
|                        |          | Naididae                | 0.378  | 0.010 **  |
|                        | Revello  | Ceratopogonidae         | 0.617  | 0.001 *** |
| <i>Castanea sativa</i> | Crissolo | Limnephilidae           | 0.962  | 0.001 *** |
|                        |          | <i>Protonemura</i>      | 0.745  | 0.001 *** |
|                        |          | <i>Dugesia</i>          | 0.690  | 0.001 *** |
|                        |          | <i>Crenobia</i>         | 0.636  | 0.001 *** |
|                        |          | <i>Isoperla</i>         | 0.610  | 0.001 *** |
|                        |          | Hydracarina             | 0.508  | 0.001 *** |
|                        |          | Simuliidae              | 0.479  | 0.010 **  |
|                        |          | Tipulidae               | 0.458  | 0.001 *** |
|                        |          | Hydraenidae             | 0.287  | 0.028 *   |
|                        | Sanfront | <i>Amphinemura</i>      | 0.779  | 0.001 *** |
|                        |          | <i>Paraleptophlebia</i> | 0.659  | 0.001 *** |
|                        |          | <i>Habroleptoides</i>   | 0.610  | 0.001 *** |
|                        | Revello  | Ceratopogonidae         | 0.682  | 0.001 *** |

**Table S14.** List of macroinvertebrates total abundances and functional feeding groups in Crissolo sampling site regarding both leaf types. P = Predator; Sh = Shredder; Sc = Scraper; F = Filterer; Cg = Collector–gatherer.

| Leaf Type                                      | Order         | Taxon              | Abundance  | FFG |
|------------------------------------------------|---------------|--------------------|------------|-----|
| <i>Quercus robur</i><br><i>Castanea sativa</i> | Plecoptera    | <i>Perlodes</i>    | 6<br>6     | P   |
| <i>Quercus robur</i><br><i>Castanea sativa</i> | Plecoptera    | <i>Isoperla</i>    | 47<br>49   | P   |
| <i>Quercus robur</i><br><i>Castanea sativa</i> | Plecoptera    | <i>Nemoura</i>     | 309<br>544 | Sh  |
| <i>Quercus robur</i><br><i>Castanea sativa</i> | Plecoptera    | <i>Amphinemura</i> | 46<br>15   | Sh  |
| <i>Quercus robur</i><br><i>Castanea sativa</i> | Plecoptera    | <i>Protonemura</i> | 159<br>100 | Sh  |
| <i>Quercus robur</i><br><i>Castanea sativa</i> | Plecoptera    | <i>Leuctra</i>     | 342<br>399 | Sh  |
| <i>Quercus robur</i><br><i>Castanea sativa</i> | Plecoptera    | <i>Chloroperla</i> | 54<br>65   | P   |
| <i>Quercus robur</i>                           | Plecoptera    | <i>Dictyogenus</i> | 1          | P   |
| <i>Quercus robur</i><br><i>Castanea sativa</i> | Ephemeroptera | <i>Ecdyonurus</i>  | 16<br>10   | Sc  |
| <i>Castanea sativa</i>                         | Ephemeroptera | <i>Epeorus</i>     | 2          | Sc  |
| <i>Quercus robur</i><br><i>Castanea sativa</i> | Ephemeroptera | <i>Rhithrogena</i> | 4<br>1     | Sc  |
| <i>Quercus robur</i><br><i>Castanea sativa</i> | Ephemeroptera | <i>Baetis</i>      | 31<br>61   | Cg  |
| <i>Quercus robur</i><br><i>Castanea sativa</i> | Ephemeroptera | <i>Serratella</i>  | 3<br>1     | Cg  |
| <i>Quercus robur</i><br><i>Castanea sativa</i> | Trichoptera   | Hydropsichidae     | 1<br>2     | F   |
| <i>Quercus robur</i><br><i>Castanea sativa</i> | Trichoptera   | Rhyacophilidae     | 2<br>3     | P   |
| <i>Quercus robur</i>                           | Trichoptera   | Sericostomatidae   | 10         | Sh  |

|                                                |             |                 |             |    |
|------------------------------------------------|-------------|-----------------|-------------|----|
| <i>Castanea sativa</i>                         |             |                 | 8           |    |
| <i>Quercus robur</i><br><i>Castanea sativa</i> | Trichoptera | Limnephilidae   | 924<br>1355 | Sh |
| <i>Quercus robur</i><br><i>Castanea sativa</i> | Trichoptera | Beraeidae       | 2<br>1      | Sc |
| <i>Quercus robur</i><br><i>Castanea sativa</i> | Trichoptera | Goeridae        | 2<br>1      | Sc |
| <i>Quercus robur</i><br><i>Castanea sativa</i> | Diptera     | Chironomidae    | 426<br>317  | Cg |
| <i>Quercus robur</i><br><i>Castanea sativa</i> | Diptera     | Simuliidae      | 22<br>54    | F  |
| <i>Quercus robur</i>                           | Diptera     | Blephariceridae | 2           | Sc |
| <i>Quercus robur</i><br><i>Castanea sativa</i> | Diptera     | Athericidae     | 4<br>3      | P  |
| <i>Quercus robur</i><br><i>Castanea sativa</i> | Diptera     | Tipulidae       | 30<br>17    | Sh |
| <i>Castanea sativa</i>                         | Diptera     | Limoniidae      | 2           | P  |
| <i>Quercus robur</i><br><i>Castanea sativa</i> | Diptera     | Empididae       | 2<br>2      | P  |
| <i>Quercus robur</i><br><i>Castanea sativa</i> | Diptera     | Psychodidae     | 7<br>2      | Sc |
| <i>Quercus robur</i>                           | Coleoptera  | Elmidae         | 2           | Cg |
| <i>Castanea sativa</i>                         | Coleoptera  | Hydraenidae     | 4           | Sc |
| <i>Castanea sativa</i>                         | Oligochaeta | Naididae        | 1           | Cg |
| <i>Quercus robur</i><br><i>Castanea sativa</i> | Tricladida  | <i>Dugesia</i>  | 224<br>45   | P  |
| <i>Quercus robur</i><br><i>Castanea sativa</i> | Tricladida  | <i>Crenobia</i> | 148<br>69   | P  |
| <i>Quercus robur</i><br><i>Castanea sativa</i> | Arachnida   | Hydracarina     | 23<br>19    | P  |

**Table S15.** List of macroinvertebrates total abundances and functional feeding groups in Sanfront sampling site regarding both leaf types. P = Predator; Sh = Shredder; Sc = Scraper; F = Filterer; Cg = Collector–gatherer.

| Leaf Type                                      | Order         | Taxon              | Abundance  | FFG |
|------------------------------------------------|---------------|--------------------|------------|-----|
| <i>Quercus robur</i><br><i>Castanea sativa</i> | Plecoptera    | <i>Perla</i>       | 2<br>2     | P   |
| <i>Quercus robur</i><br><i>Castanea sativa</i> | Plecoptera    | <i>Perlodes</i>    | 1<br>1     | P   |
| <i>Quercus robur</i><br><i>Castanea sativa</i> | Plecoptera    | <i>Isoperla</i>    | 30<br>5    | P   |
| <i>Quercus robur</i><br><i>Castanea sativa</i> | Plecoptera    | <i>Nemoura</i>     | 80<br>73   | Sh  |
| <i>Quercus robur</i><br><i>Castanea sativa</i> | Plecoptera    | <i>Amphinemura</i> | 276<br>222 | Sh  |
| <i>Quercus robur</i><br><i>Castanea sativa</i> | Plecoptera    | <i>Protonemura</i> | 10<br>14   | Sh  |
| <i>Quercus robur</i><br><i>Castanea sativa</i> | Plecoptera    | <i>Leuctra</i>     | 252<br>225 | Sh  |
| <i>Quercus robur</i><br><i>Castanea sativa</i> | Plecoptera    | <i>Chloroperla</i> | 32<br>36   | P   |
| <i>Quercus robur</i><br><i>Castanea sativa</i> | Plecoptera    | <i>Capnia</i>      | 1<br>2     | Sh  |
| <i>Castanea sativa</i>                         | Plecoptera    | Taeniopterygidae   | 1          | Sh  |
| <i>Quercus robur</i><br><i>Castanea sativa</i> | Ephemeroptera | <i>Ecdyonurus</i>  | 28<br>42   | Sc  |
| <i>Quercus robur</i>                           | Ephemeroptera | <i>Epeorus</i>     | 2          | Sc  |
| <i>Quercus robur</i><br><i>Castanea sativa</i> | Ephemeroptera | <i>Rhithrogena</i> | 137<br>61  | Sc  |
| <i>Quercus robur</i><br><i>Castanea sativa</i> | Ephemeroptera | <i>Electrogena</i> | 7<br>4     | Sc  |
| <i>Castanea sativa</i>                         | Ephemeroptera | <i>Heptagenia</i>  | 1          | Sc  |
| <i>Quercus robur</i><br><i>Castanea sativa</i> | Ephemeroptera | <i>Baetis</i>      | 109<br>73  | Cg  |

|                                                |               |                         |              |      |
|------------------------------------------------|---------------|-------------------------|--------------|------|
| <i>Quercus robur</i><br><i>Castanea sativa</i> | Ephemeroptera | <i>Serratella</i>       | 5<br>1       | Cg   |
| <i>Quercus robur</i><br><i>Castanea sativa</i> | Ephemeroptera | <i>Habroleptoides</i>   | 14<br>50     | Cg   |
| <i>Quercus robur</i><br><i>Castanea sativa</i> | Ephemeroptera | <i>Paraleptophlebia</i> | 90<br>98     | Cg   |
| <i>Quercus robur</i><br><i>Castanea sativa</i> | Trichoptera   | Hydropsichidae          | 109<br>76    | F    |
| <i>Quercus robur</i><br><i>Castanea sativa</i> | Trichoptera   | Rhyacophilidae          | 17<br>14     | P    |
| <i>Castanea sativa</i>                         | Trichoptera   | Sericostomatidae        | 1            | Sh   |
| <i>Quercus robur</i><br><i>Castanea sativa</i> | Trichoptera   | Limnephilidae           | 13<br>6      | Sh   |
| <i>Castanea sativa</i>                         | Trichoptera   | Odontoceridae           | 1            | Sc   |
| <i>Quercus robur</i>                           | Trichoptera   | Beraeidae               | 1            | Sc   |
| <i>Quercus robur</i><br><i>Castanea sativa</i> | Diptera       | Chironomidae            | 3686<br>4516 | Cg   |
| <i>Quercus robur</i><br><i>Castanea sativa</i> | Diptera       | Simuliidae              | 4<br>1       | F    |
| <i>Quercus robur</i><br><i>Castanea sativa</i> | Diptera       | Ceratopogonidae         | 15<br>20     | P    |
| <i>Quercus robur</i><br><i>Castanea sativa</i> | Diptera       | Athericidae             | 2<br>8       | P    |
| <i>Castanea sativa</i>                         | Diptera       | Tipulidae               | 1            | Sh   |
| <i>Quercus robur</i><br><i>Castanea sativa</i> | Diptera       | Limoniidae              | 1<br>1       | P    |
| <i>Quercus robur</i><br><i>Castanea sativa</i> | Diptera       | Empididae               | 9<br>10      | P    |
| <i>Quercus robur</i>                           | Diptera       | Culicidae               | 1            | F/Cg |
| <i>Quercus robur</i><br><i>Castanea sativa</i> | Coleoptera    | Elmidae                 | 9<br>9       | Cg   |
| <i>Castanea sativa</i>                         | Coleoptera    | Dytiscidae              | 1            | P    |

|                                                |             |                 |         |      |
|------------------------------------------------|-------------|-----------------|---------|------|
| <i>Quercus robur</i><br><i>Castanea sativa</i> | Coleoptera  | Gyrinidae       | 2<br>2  | P    |
| <i>Quercus robur</i><br><i>Castanea sativa</i> | Oligochaeta | Naididae        | 9<br>11 | Cg   |
| <i>Castanea sativa</i>                         | Oligochaeta | Lumbriculidae   | 3       | Cg   |
| <i>Quercus robur</i><br><i>Castanea sativa</i> | Crustacea   | Gammaridae      | 1<br>5  | Sh   |
| <i>Quercus robur</i><br><i>Castanea sativa</i> | Arachnida   | Hydracarina     | 7<br>3  | P    |
| <i>Quercus robur</i>                           | Nematoda    | Nematoda indet. | 3       | P/Cg |

**Table S16.** List of macroinvertebrates total abundances and functional feeding groups in Revello sampling site regarding both leaf types. P = Predator; Sh = Shredder; Sc = Scraper; F = Filterer; Cg = Collector–gatherer.

| Leaf Type              | Order         | Taxon              | Abundance | FFG |
|------------------------|---------------|--------------------|-----------|-----|
| <i>Castanea sativa</i> | Plecoptera    | <i>Perla</i>       | 1         | P   |
| <i>Castanea sativa</i> | Plecoptera    | <i>Perlodes</i>    | 1         | P   |
| <i>Quercus robur</i>   | Plecoptera    | <i>Isoperla</i>    | 3<br>5    | P   |
| <i>Quercus robur</i>   | Plecoptera    | <i>Nemoura</i>     | 19<br>27  | Sh  |
| <i>Quercus robur</i>   | Plecoptera    | <i>Amphinemura</i> | 50<br>71  | Sh  |
| <i>Quercus robur</i>   | Plecoptera    | <i>Protonemura</i> | 2         | Sh  |
| <i>Quercus robur</i>   | Plecoptera    | <i>Leuctra</i>     | 49<br>149 | Sh  |
| <i>Quercus robur</i>   | Plecoptera    | <i>Chloroperla</i> | 2         | P   |
| <i>Castanea sativa</i> | Plecoptera    | <i>Capnia</i>      | 1         | Sh  |
| <i>Quercus robur</i>   | Ephemeroptera | <i>Ecdyonurus</i>  | 42<br>27  | Sc  |

|                      |               |                         |            |    |
|----------------------|---------------|-------------------------|------------|----|
| <i>Quercus robur</i> | Ephemeroptera | <i>Rhithrogena</i>      | 117<br>109 | Sc |
| <i>Quercus robur</i> | Ephemeroptera | <i>Electrogena</i>      | 5<br>5     | Sc |
| <i>Quercus robur</i> | Ephemeroptera | <i>Baetis</i>           | 74<br>104  | Cg |
| <i>Quercus robur</i> | Ephemeroptera | <i>Serratella</i>       | 3          | Cg |
| <i>Quercus robur</i> | Ephemeroptera | <i>Habroleptoides</i>   | 10<br>6    | Cg |
| <i>Quercus robur</i> | Ephemeroptera | <i>Paraleptophlebia</i> | 9<br>20    | Cg |
| <i>Quercus robur</i> | Trichoptera   | Hydropsichidae          | 27         | F  |



|                        |             |                  |              |    |
|------------------------|-------------|------------------|--------------|----|
|                        |             |                  | 58           |    |
| <i>Quercus robur</i>   | Trichoptera | Rhyacophilidae   | 6<br>16      | P  |
| <i>Castanea sativa</i> | Trichoptera | Sericostomatidae | 1            | Sh |
| <i>Castanea sativa</i> | Trichoptera | Limnephilidae    | 8            | Sh |
| <i>Quercus robur</i>   | Trichoptera | Philopotamidae   | 1            | F  |
| <i>Quercus robur</i>   | Trichoptera | Beraeidae        | 1<br>1       | Sc |
| <i>Quercus robur</i>   | Diptera     | Chironomidae     | 2000<br>2269 | Cg |
| <i>Quercus robur</i>   | Diptera     | Simuliidae       | 8<br>30      | F  |
| <i>Quercus robur</i>   | Diptera     | Ceratopogonidae  | 83<br>104    | P  |
| <i>Castanea sativa</i> | Diptera     | Athericidae      | 2            | P  |
| <i>Quercus robur</i>   | Diptera     | Limoniidae       | 1<br>3       | P  |
| <i>Castanea sativa</i> | Diptera     | Empididae        | 1            | P  |
| <i>Quercus robur</i>   | Coleoptera  | Elmidae          | 3<br>24      | Cg |
| <i>Castanea sativa</i> | Coleoptera  | Dytiscidae       | 1            | P  |
| <i>Quercus robur</i>   | Coleoptera  | Hydraenidae      | 2<br>1       | Sc |
| <i>Castanea sativa</i> | Coleoptera  | Dryopidae        | 1            | Cg |
| <i>Castanea sativa</i> | Coleoptera  | Gyrinidae        | 1            | P  |
| <i>Quercus robur</i>   | Oligochaeta | Naididae         | 4<br>3       | Cg |
| <i>Quercus robur</i>   | Oligochaeta | Lumbricidae      | 7            | Cg |
| <i>Castanea sativa</i> | Crustacea   | Gammaridae       | 2            | Sh |

|                        |              |                 |        |      |
|------------------------|--------------|-----------------|--------|------|
| <i>Quercus robur</i>   | Arachnida    | Hydracarina     | 3<br>1 | P    |
| <i>Castanea sativa</i> | Nematoda     | Nematoda indet. | 1      | P/Cg |
| <i>Castanea sativa</i> | Nematomorpha | Gordiidae       | 1      | P    |
